1 **Preprint**

2

3 **EntireAxon: Deep learning deciphers four distinct patterns of axonal**  
4 **degeneration**

5

6

7 **Alex Palumbo**<sup>1,2,3,\*</sup> (ORCID: 0000-0002-1631-785X), **Philipp Grüning**<sup>4</sup> (ORCID: 0000-0003-  
8 2946-4020), **Svenja Kim Landt**<sup>1,2</sup> (ORCID: 0000-0002-4133-7035), **Lara Eleen Heckmann**<sup>1,2</sup>  
9 (ORCID: 0000-0003-1264-9715), **Luisa Bartram**<sup>1</sup>, **Alessa Pabst**<sup>1,2</sup> (ORCID: 0000-0003-1938-  
10 3753), **Charlotte Flory**<sup>1,2</sup> (ORCID: 0000-0001-5049-6380), **Maulana Ikhsan**<sup>1,2,3</sup> (ORCID: 0000-  
11 0002-8756-4524), **Sören Pietsch**<sup>1,2,5</sup>, **Reinhard Schulz**<sup>6</sup>, **Christopher Kren**<sup>7</sup>, **Norbert Koop**<sup>7</sup>,  
12 **Johannes Boltze**<sup>1,2,8</sup> (ORCID: 0000-0003-3956-4164, **Amir Madany Mamlouk**<sup>4</sup> (ORCID: 0000-  
13 0001-9709-1620) **and Marietta Zille**<sup>1,2,3,\*</sup> (ORCID: 0000-0002-0609-8956)

14

15 <sup>1</sup> Fraunhofer Research Institution for Marine Biotechnology and Cell Technology, Lübeck, Germany

16 <sup>2</sup> Institute for Medical and Marine Biotechnology, University of Lübeck, Lübeck, Germany

17 <sup>3</sup> Institute for Experimental and Clinical Pharmacology and Toxicology, University of Lübeck, Lübeck, Germany

18 <sup>4</sup> Institute for Neuro- and Bioinformatics, University of Lübeck, Lübeck, Germany

19 <sup>5</sup> Department of Neonatology, Universitätsklinikum Leipzig, Leipzig, Germany

20 <sup>6</sup> Wissenschaftliche Werkstätten, University of Lübeck, Lübeck, Germany

21 <sup>7</sup> Medical Laser Center Lübeck GmbH, Lübeck, Germany

22 <sup>8</sup> School of Life Sciences, The University of Warwick, Gibbet Hill Campus, Coventry, United Kingdom

23 \* Correspondance to: alex.palumbo@uni-luebeck.de; m.zille@uni-luebeck.de

24

25 **Abstract**

26 Different axonal degeneration (AxD) patterns have been described depending on the biological  
27 condition. Until now, it remains unclear whether they are restricted to one specific condition or  
28 can occur concomitantly. Here, we present a novel microfluidic device in combination with a  
29 deep learning tool, the EntireAxon, for the high-throughput analysis of AxD. We evaluated the  
30 progression of AxD in an *in vitro* model of hemorrhagic stroke and observed that axonal  
31 swellings preceded axon fragmentation. We further identified four distinct morphological  
32 patterns of AxD (granular, retraction, swelling, and transport degeneration) that occur  
33 concomitantly. These findings indicate a morphological heterogeneity of AxD under  
34 pathophysiologic conditions. The newly developed microfluidic device along with the  
35 EntireAxon deep learning tool enable the systematic analysis of AxD but also unravel a so far  
36 unknown intricacy in which AxD can occur in a disease context.

37

38

## 39 **Introduction**

40 Axonal degeneration (AxD) is a process in which axons disintegrate physiologically during  
41 nervous system development and aging, or as a pathological element of degenerative nervous  
42 system diseases<sup>1-3</sup>. During development and neural circuit assembly, inappropriately grown  
43 axons can undergo axonal retraction, axonal shedding or local AxD<sup>4,5</sup>. Axonal retraction is  
44 characterized by retraction bulb formation at the distal tip, and subsequent pullback<sup>4</sup>. During  
45 axonal shedding, the axon sheds small vesicles, called axosomes<sup>6</sup>. Local AxD is characterized  
46 by axon disintegration into separated axonal fragments<sup>5</sup>.

47 Acutely and chronically injured axons may degenerate retrogradely (dying-back mechanism),  
48 anterogradely or in a Wallerian degeneration pattern, ultimately resulting in the generation of  
49 axonal fragments<sup>7-9</sup>. Another morphological feature that occurs during AxD in development  
50 and disease is axon swelling. The swollen axon contains disorganized cytoskeleton and  
51 organelles resulting from an interruption of axonal transport, reactive oxygen species exposure  
52 or nutrient deprivation<sup>8,10,11</sup>. Both axonal swellings and axonal fragments represent hallmarks  
53 of AxD independent of the biological context<sup>2,12,13</sup>. Therefore, it is relevant to detect the  
54 different degeneration patterns and to ascertain their underlying morphological changes to  
55 better understand their role in AxD during development and pathophysiology.

56 To assess the spatiotemporal progression of the different AxD patterns, morphological changes  
57 of axons must be recorded continuously. However, available software fails to automatically  
58 detect and quantify high axon numbers and the morphological features of AxD (swellings and  
59 fragments). The reason may be two-fold: 1) Available software relies on image binarization<sup>14,15</sup>,  
60 which can lead to information loss and low sensitivity as thin axons may not be recognized. 2)  
61 The analysis requires subjective and time-consuming manual annotations, e.g., thresholding  
62 and defining the region of interest<sup>16-18</sup>. So far, immunostained images were used to investigate  
63 morphological changes in AxD as the analysis of phase-contrast images has been limited by the  
64 lower target-to-background signal. Immunofluorescence images, however, entail certain

65 disadvantages such as photobleaching and the requirement for cell fixation, which allows only  
66 to observe a single time point. Hence, a software tool for the automatized detection and  
67 quantification of the morphological patterns of AxD in long-term live cell imaging is required  
68 to improve the sensitivity and throughput, which will overcome current limitations in  
69 understanding AxD.

70 In this study, we hypothesized that axons can undergo different AxD patterns, which rely on  
71 different underlying morphological features and depend on the severity of AxD. To  
72 systematically study AxD in a high-throughput manner, we fabricated a microfluidic device in  
73 the format of a conventional cell culture plate containing 16 independent microfluidic units that  
74 separate axons from their somata. We also developed a novel deep learning tool called  
75 “EntireAxon” to analyze AxD in phase-contrast time-lapse recordings. Our newly developed  
76 detection algorithm can sensitively and specifically recognize axons, axonal swellings and  
77 axonal fragments during AxD in an *in vitro* model of hemorrhagic stroke and its performance  
78 is equal to human expert rating. EntireAxon enabled the identification of four different  
79 morphological patterns of AxD based on a histogram analysis of segmentation changes over  
80 time. These patterns occurred concomitantly and in a concentration-dependent manner in  
81 hemin-induced AxD.

## 82 **Results**

83

### 84 **A novel microfluidic device for the high-throughput analysis of axonal degeneration**

85 Experimental models such as microfluidic devices have been developed to spatially separate  
86 axons from their somata<sup>19,20</sup>. Thus, the axons can be treated in an isolated manner to investigate  
87 AxD. The major limiting factor of commercially available microfluidic devices is that they are  
88 single, individual systems and hence, can only be used to assess one condition, which is time-  
89 consuming and precludes high-throughput analyses.

90 To overcome this limitation, we manufactured a microfluidic device containing 16 individual  
91 microfluidic units by using the soft lithography technique replica molding (**Fig. 1, suppl.**  
92 **Fig. 1**). The spatial separation of axons from their somata was confirmed by immunostaining  
93 (**Fig. 1c**) using the established dendritic marker MAP2 and axonal marker synaptophysin<sup>21,22</sup>.

94

### 95 **The EntireAxon convolutional neural network (CNN) recognizes axons and the** 96 **morphological features of AxD**

97 To enable the systematic high-throughput analysis of AxD over time in phase-contrast  
98 microscopy, we trained the EntireAxon CNN to segment all relevant features of AxD, i.e.  
99 axons, axonal swellings, and axonal fragments (**Fig. 2**).

100 Specifically, we adapted a standard u-net with ResNet-50 encoder<sup>23,24</sup> and used a CNN  
101 ensemble, which combines predictions from multiple CNNs to generate a final output and is  
102 superior to individual CNNs<sup>25-27</sup>. To validate the training success, a separate labeled validation  
103 set unknown to the EntireAxon was created (ground truth was labeled by human expert 1).  
104 While the EntireAxon CNN recognized the class ‘background’ better than the three axon classes  
105 ‘axon’, ‘axonal swelling’, and ‘axonal fragment’ (mean F1 score: 0.995), axon-specific  
106 segmentation revealed the highest mean F1 score for the class ‘axon’ (0.780), followed by the  
107 classes ‘axonal swelling’ (0.567), and ‘axonal fragment’ (0.301) (**Fig. 3a**). The comparably

108 lower performance of the CNN to recognize axonal fragments may be explained by the  
109 disproportional distribution of pixels in the training data with a mean of 96.42 % of pixels  
110 belonging to the class ‘background’, while only 2.77% represented the class ‘axon’, 0.58%  
111 ‘axonal swelling’, and 0.23 % ‘axonal fragment’.

112 Next, we compared the performance of the trained EntireAxon CNN on the ground truth  
113 (human expert 1) with the performance of two additional human experts. The EntireAxon CNN  
114 reached higher mean F1 scores for all classes, except for the class ‘axonal fragment’, where  
115 human expert 2 outperformed the EntireAxon CNN (**Fig. 3b**). This may have been due to the  
116 fact that the EntireAxon CNN was trained on images labeled by the same human expert (1) that  
117 labeled the ground truth. To assess whether its performance is more generalizable across the  
118 different experts, we compared the EntireAxon CNN to each of the human experts on the  
119 consensus labels of the two other human experts (**Fig. 3c-d**). Visual inspection of the labels  
120 showed a wide overlap between the different experts, but also that there was considerable  
121 uncertainty, especially for the classification of axonal fragments (**Fig. 3c**). When comparing the  
122 mean F1 scores for all classes, the EntireAxon reached similar or even higher scores than the  
123 other three experts (**Fig. 3d**). Collectively, this suggests that the EntireAxon CNN sensitively  
124 and specifically recognizes axons and the morphological features of AxD, i.e. axonal swellings  
125 and axonal fragments.

126

### 127 **AxD progresses concentration- and time-dependent**

128 We then applied the EntireAxon CNN to assess AxD in an *in vitro* model of hemorrhagic  
129 stroke<sup>28</sup>. Accordingly, axons were exposed to the hemolysis product hemin and recorded by  
130 time-lapse microscopy for 24 hours. Hemin induced concentration- and time-dependent  
131 morphological changes leading to AxD compared to vehicle-treated axons (**Fig. 4 and suppl.**  
132 **Videos 1-4**). Area under the curve (AUC) analyses revealed a significant decrease in axon area  
133 in all three hemin concentrations (50  $\mu$ M vs. 0  $\mu$ M:  $p=0.026$ ; 100  $\mu$ M vs. 0  $\mu$ M:  $p=0.018$ ,

134 200  $\mu\text{M}$  vs. 0  $\mu\text{M}$ :  $p < 0.001$ ). The axonal swelling area also increased in all three concentrations  
135 (50  $\mu\text{M}$  vs. 0  $\mu\text{M}$ :  $p = 0.012$ , 100  $\mu\text{M}$  vs. 0  $\mu\text{M}$ :  $p = 0.005$ , 200  $\mu\text{M}$  vs. 0  $\mu\text{M}$ :  $p = 0.016$ ), while the  
136 axonal fragment area was elevated only for axons treated with 100 and 200  $\mu\text{M}$  hemin (vs.  
137 0  $\mu\text{M}$ :  $p = 0.004$ , **suppl. Fig. 2**).

138 Comparing the time course of AxD between hemin- and vehicle-treated axons (0  $\mu\text{M}$ ), the axon  
139 area decreased starting at 11.5 hours at 200  $\mu\text{M}$  ( $p = 0.020$ , from 15 hours onwards  $p < 0.001$ ), at  
140 14 hours at 100  $\mu\text{M}$  ( $p = 0.040$ , from 18.5 hours onwards  $p < 0.001$ ), and at 15 hours at 50  $\mu\text{M}$   
141 ( $p = 0.018$ , from 19 hours onwards  $p < 0.001$ ). Hemin treatment also an elevated axonal fragment  
142 area starting at 9 hours at 200  $\mu\text{M}$  ( $p = 0.037$ ) and at 17 hours at 100  $\mu\text{M}$  hemin ( $p = 0.044$ ).  
143 Interestingly, the axonal swelling area increased prior to the changes in axon and axonal  
144 fragment area, i.e. starting at 6 hours at 200  $\mu\text{M}$  ( $p = 0.010$ ) and 100  $\mu\text{M}$  ( $p = 0.019$ ), and at  
145 8 hours at 50  $\mu\text{M}$  hemin ( $p = 0.030$ ). For the highest hemin concentration, the increase was only  
146 transient (until 18.5 hours), suggesting that axonal swellings preceded the fragmentation of the  
147 axon.

148 The results of the time course analysis were further substantiated by live cell fluorescent  
149 staining (calcein AM), which indicated the starting point of AxD after hemin treatment between  
150 8 and 12 hours for 200  $\mu\text{M}$  hemin, between 12 and 16 hours for 100  $\mu\text{M}$  hemin and 16 and  
151 20 hours for 50  $\mu\text{M}$  hemin (**suppl. Fig. 3**). Taken together, the EntireAxon CNN was able to  
152 quantify the degree of AxD and to determine the underlying temporal progression.

153

154 **The EntireAxon recurrent neural network (RNN) recognizes four distinct patterns of**  
155 **AxD**

156 AxD time series data revealed that different morphological patterns of degeneration can occur  
157 in the same axons over time (**Fig. 5** and **suppl. Videos 5-8**). We therefore classified the  
158 following four morphological patterns of AxD based on the time-lapse recordings:

159 i) Granular degeneration: AxD resulting in granular separated fragments.

160 ii) Retraction degeneration: AxD in which the distal part of the axon retracts ultimately  
161 resulting in granular degeneration.

162 iii) Swelling degeneration: AxD with the enlargement of axonal swellings and subsequent  
163 granular degeneration.

164 iv) Transport degeneration: AxD in which axonal swellings of constant size, which do not  
165 enlarge, are transported along the axon resulting in granular degeneration.

166 We hypothesized that the different morphological AxD patterns can occur concomitantly. We  
167 therefore trained the EntireAxon RNN to identify changes in class segregation over time using  
168 a training dataset of AxD segmentation recordings (**Fig. 6a**). For each time point, the RNN  
169 computed the probability of a change in class for each pixel of an image relative to the previous  
170 time point.

171 Based on the 16 different possible class changes, the RNN determined seven clusters (cluster  
172 0-6) that were characterized by an idiosyncratic segmentation pattern over 24 hours (**Suppl.**  
173 **Fig. 4**). All clusters showed a decrease in the class ‘axon’ and an increase in the class  
174 ‘background’, although to different degrees, temporal patterns, and some of them with  
175 concomitant increases in either the class ‘axonal swelling’ and/or ‘axonal fragment’. In cluster  
176 0, there was an early decrease in the class ‘axon’, which then continued more linearly as well  
177 as a later rise in the class ‘axonal fragment’. In contrast to cluster 0, cluster 1 showed no increase  
178 in the class ‘axonal fragment’ and a linear decrease in the class ‘axon’ from the start. In cluster  
179 2, there was a strong increase in the class ‘axonal swelling’. Cluster 3 demonstrated an early  
180 and lasting high level of the class ‘axonal swelling’ with a later increase in the class ‘axonal  
181 fragment’. Cluster 4 showed a rapid decrease in the class ‘axon’ concomitant with an increase  
182 in the classes ‘background’ and ‘axonal swelling’. Cluster 5 was similar to cluster 1, but with  
183 an early drop in the class ‘axon’. Cluster 6 showed an increase in the class ‘axonal swelling’  
184 similar to but to a greater extent than cluster 2.



185 The RNN categorized each cluster to one of the four morphological patterns (**Fig. 6b**): i)  
186 Granular degeneration was defined by clusters that describe the degeneration of axons into  
187 axonal fragments, i.e. clusters 0, 1, 3, and 5. ii) Retraction degeneration only included the  
188 clusters 1 and 5, indicating the retraction of the axon followed by its fragmentation. iii) Swelling  
189 degeneration was characterized by the three clusters that included the class ‘axonal swelling,  
190 i.e. clusters 2, 3, and 6, as well as cluster 5 showing the exchange of the class ‘axon’ for  
191 ‘background’. iv) Transport degeneration was the only pattern that relied on cluster 4 and was  
192 also characterized partly on clusters 0, 1, 2, and 6. Although some clusters overlap among  
193 morphological patterns, the unique combination of the different clusters allows to distinguish  
194 all four morphological patterns.

195 To validate the EntireAxon RNN, a 10-fold cross-validation was performed, which  
196 demonstrated its ability to distinguish between the four morphological patterns of AxD (**Fig.**  
197 **6c**). These data confirm that the combination of the different AxD features as well as their  
198 spatiotemporal progression defines distinct morphological AxD patterns.

199

### 200 **The morphological patterns of AxD depend on the extent of AxD**

201 We then applied the EntireAxon RNN to quantify the occurrence of the different morphological  
202 patterns of AxD (**Fig. 7**). Hemin-treated axons underwent granular, retraction, swelling, and  
203 transport degeneration concomitantly as these patterns occur either close to or at the exact same  
204 locations (**Fig. 7a**). Hemin concentration-dependently increased all morphological AxD  
205 patterns, with granular degeneration being significantly increased for the 100  $\mu$ M ( $p=0.004$ )  
206 and 200  $\mu$ M hemin samples ( $p=0.001$ ), while swelling degeneration was significantly increased  
207 for 50  $\mu$ M ( $p=0.006$ ) and 100  $\mu$ M ( $p=0.004$ ) hemin-treated compared to vehicle-treated axons.  
208 Neither retraction nor transport degeneration differed among the investigated concentration  
209 (**Fig. 7b**).

210 Collectively, our data suggest that hemin gradually shifts the morphological pattern of AxD  
211 from swelling degeneration to granular degeneration, which is in accordance with our findings  
212 that axonal swellings preceded axonal fragmentation.

## 213 Discussion

214 We here describe for the first time the concomitant occurrence of four different morphological  
215 patterns of AxD under pathophysiological conditions, i.e. granular, retraction, swelling, and  
216 transport degeneration. These rely on time- and concentration-dependent changes of the  
217 morphological features of AxD, with axonal swellings preceding axon fragmentation. The  
218 herein introduced complementary tools consisting of a novel microfluidic device and the  
219 EntireAxon deep learning platform allow to increase the experimental yield and the in-depth  
220 high-throughput analysis of AxD.

221  
222 The extent of AxD has been mainly investigated with a focus on axon fragmentation so far. To  
223 quantify axon fragmentation, Sasaki and colleagues introduced the AxD index as the ratio of  
224 fragmented axon area versus total axonal area<sup>14</sup>. However, the AxD index did not include  
225 axonal swellings, which is another characteristic feature of degenerating axons<sup>11,29</sup>. Hence, the  
226 precise spatiotemporal role of axonal swellings in AxD remains elusive.

227 The herein presented EntireAxon CNN performs an automatic segmentation and quantification  
228 of axons and morphological features relevant to AxD, including axonal swellings and  
229 fragments, on phase-contrast time-lapse microscopy images (**Fig. 2**). The EntireAxon CNN  
230 recognized the four classes ‘background’, ‘axon’, ‘axonal swelling’, and ‘axonal fragment’,  
231 with the highest mean F1 score for the class ‘background’ (**Fig. 3a**) as background pixels  
232 covered most of the image.

233 Although the performance of the EntireAxon CNN on the axon-related classes was comparably  
234 lower due to the imbalanced prevalence of each class in the images, the comparison with human  
235 experts revealed that the EntireAxon CNN reached a similar performance level. As expected,  
236 its performance was slightly better than the human experts on the ground truth as both, ground  
237 truth and training data, were labeled by the same human expert (**Fig. 3b**). Interestingly, when  
238 comparing the EntireAxon CNN with a human expert on the consensus label of the other two

239 human experts, not only was the EntireAxon CNN as good as or even better than the human  
240 expert, but the mean F1 scores were also higher than on the ground truth labels (**Fig. 3d**). This  
241 may be because pixels that were differentially assigned by the human expert, i.e. more difficult  
242 to classify, were excluded from the comparison. Taken together, these findings demonstrate  
243 that the EntireAxon CNN is suitable to quantify automatically and in a high-throughput manner  
244 AxD and its accompanying morphological changes.

245 Using the newly developed EntireAxon CNN, we were able to investigate AxD in an *in vitro*  
246 model of hemorrhagic stroke. To our knowledge, this is the first *in vitro* study to characterize  
247 AxD after hemorrhagic stroke. AxD is an active and commonly observed process in  
248 intracerebral hemorrhage<sup>30,31</sup>, with larger hematomas being associated with a more severe  
249 progression of white matter injury resulting in poor motor and functional recovery<sup>30,32</sup>. As the  
250 underlying mechanisms of AxD in hemorrhagic stroke remain to be elucidated and represent a  
251 research priority in the field<sup>33</sup>, we investigated the morphological changes that can occur in  
252 axons in response to hemorrhage.

253 We therefore modeled hemorrhagic stroke by exposing outgrown axons from primary cortical  
254 neurons to the hemolysis product hemin. In our model, AxD started within 12 to 18 hours after  
255 the administration of hemin (**Fig. 4** and **suppl. Fig. 3**). Similar AxD starting time points have  
256 been observed *in vitro* in other models. For instance, under circumstances of growth factor  
257 withdrawal, axons undergo AxD at 12-24 hours<sup>11,34,35</sup>.

258 We further demonstrated that the relative axon area decreased with increasing hemin  
259 concentrations, while the axonal fragment area increased. Our results are in accordance with  
260 other experimental conditions such as axotomy-mediated or paclitaxel-induced AxD, in which  
261 the axonal fragments also increased<sup>14,36</sup>. As the axonal swelling area preceded the increase of  
262 axonal fragments and axon area loss, our findings are also in line with results reported in a  
263 model of experimental autoimmune encephalomyelitis indicating that axonal swelling  
264 anticipates fragmentation<sup>10</sup>.

265 Interestingly, axonal swellings and axonal fragments were related to different morphological  
266 patterns of AxD in our model. Specifically, we observed axons that showed signs of axonal  
267 retraction, enlarging of axonal swellings and axonal transport before degeneration (**Fig. 5**).  
268 These findings led to the hypothesis that different morphological patterns of AxD can occur  
269 concomitantly and should therefore be detectable based on our segmentation data. We therefore  
270 trained the EntireAxon RNN to quantify the occurrence of granular, retraction, swelling, and  
271 transport degeneration based on the clusters of unique changes of classes over time (**Fig. 6** and  
272 **suppl. Fig.4**):

273 i) Granular degeneration has previously been observed in retrograde, anterograde, Wallerian  
274 and local AxD<sup>5,7-9</sup>. ii) Retraction degeneration has been described in axonal retraction and  
275 shedding<sup>4,6</sup>. iii) Swelling degeneration was previously reported in experimental autoimmune  
276 encephalitis and growth factor deprivation<sup>10,11</sup>. iv) In contrast, transport degeneration has not  
277 been reported before. However, microtubule breaks have been demonstrated in an *in vitro*  
278 model of axonal stretch injury. Those developed into axonal swellings resulting in axonal  
279 transport interruption with AxD as a consequence<sup>37</sup>. The underlying molecular mechanisms of  
280 the different patterns of AxD need to be further investigated, which could be greatly facilitated  
281 by the EntireAxon RNN that is able to automatically detect the different morphological patterns  
282 in time-lapse recording due to its capacity to relate each output to previous images in the stacks  
283 by its current units.

284 All four patterns occurred concomitantly in hemin-induced AxD (**Fig. 7**), which may point to  
285 a potential synergy of the different patterns of AxD. Interestingly, we also observed a  
286 concentration-dependent effect, whereat swelling degeneration was significantly increased at  
287 lower hemin concentrations while granular degeneration occurred more frequently at higher  
288 hemin concentrations. This is in line with our data suggesting that axonal swellings precede  
289 axon fragmentation. To what extent our model of hemin-induced AxD in hemorrhagic stroke

290 is molecularly similar to developmental or pathophysiological AxD needs to be further  
291 investigated.

292 To compare different experimental conditions of AxD, we herein propose a novel monolithic  
293 microfluidic device consisting of 16 individual microfluidic units that enable the parallel and  
294 separated treatment and/or manipulation of axons and somata (**Fig. 1**). The currently available  
295 microfluidic devices do not allow high-throughput experiments as they comprise only single  
296 microfluidic units<sup>20,38</sup>. Although some devices can harbor multiple experimental conditions,  
297 they employ a radial design where a single soma compartment is used, in which influence from  
298 one experimental condition to another experimental condition cannot be excluded due to the  
299 potential of retrograde signaling<sup>39,40</sup>. Another option is the parallel use of multiple individual  
300 devices, which allows to handle up to 12 devices in a conventional 12-well plate<sup>18</sup>. Compared  
301 to our microfluidic device, this procedure is time-consuming in both the manufacturing process  
302 and the adjustment for recordings.

303

#### 304 **Limitations and outlook**

305 i) Our microfluidic device currently does not allow to investigate AxD at more proximal axonal  
306 parts to the soma such as the axonal initial segment. Since intracerebral hemorrhage often  
307 occurs in deep brain regions, affecting axons of near-by neurons as well as more distal axonal  
308 trajectories, comparing AxD in distal and proximal axonal regions may be of interest.  
309 Shortening the length of the microgrooves or including a more proximal compartment, are  
310 possible modifications of the current design.

311 ii) Our results are based on unmyelinated axons. Therefore, the time course and morphological  
312 changes may be different in co-culture with oligodendrocytes. This warrants possible future  
313 investigations.

314 iii) The observed effects of AxD in hemorrhagic stroke within this study were based on hemin  
315 toxicity, and we cannot exclude that other hemolysis products such as thrombin or bilirubin

316 have different effects. Additional studies should investigate differences of hemolysis products  
317 to increase our understanding of the mechanisms of AxD in hemorrhagic stroke.

318 iv) The overall CNN performance may be further improved with more general inputs. For  
319 example, the segmentation of fragment pixels cannot be done accurately from a single image  
320 at a specific time point as the whole process of AxD, ultimately resulting in the disintegration  
321 of the axons (i.e. the generation of axonal fragments), needs to be considered. CNNs using 3D  
322 convolutions could, in principle, perform a segmentation over an entire time-lapse recording  
323 and model temporal dependencies. However, we decided against the 3D approach, as it severely  
324 restricts general applicability due to its greatly increased effort to label suitable time series for  
325 training. In this context, the identification of the images that will yield the best results is crucial  
326 to effectively reduce labeling costs, which we have previously described using an active  
327 learning method<sup>41</sup>.

328

### 329 **Conclusion**

330 Taken together, our approach enables the systematic investigation of AxD in a high-throughput  
331 manner. In combination with the microfluidic device, the EntireAxon expands our possibilities  
332 to track AxD by detecting axons, axonal swellings and axonal fragments and identifying the  
333 related different morphological patterns of AxD. This will help to tackle the complex processes  
334 of AxD and may significantly enhance our understanding of AxD in health and disease. It may  
335 also support the development of novel treatment approaches for neurodegenerative diseases.

336

## 337 **Online methods**

338

339 Chemicals and reagents are listed in the **supplementary information (suppl. Tables 4-5)**.

340

### 341 **Fabrication of a high-throughput microfluidic device based on soft lithographic replica** 342 **molding**

343 Thirty-two wells were milled in a polymethyl methacrylate (PMMA) plate of the size of a  
344 conventional cell culture plate (**Fig. 1, suppl. Fig. 1**) using a universal milling machine (Mikron  
345 WF21C, Mikron Holding AG) with a 1 mm triple tooth cutter (HSS-CO8 Type N, Horex) at a  
346 precision of 0.01 mm. During the milling procedure, we applied a half-synthetic cooling  
347 lubricant (Opta Cool 600 HS, Wisura GmbH) on a mineral base to reduce the amount of debris.  
348 Additionally, we milled screw holes in the intermediate spaces between each microfluidic unit  
349 to later detach the PMMA from the negative casting mold. To remove debris, we washed the  
350 PMMA plate by sonication (Sonicator Elmasonic S, Elma Schmidbauer GmbH) at room  
351 temperature for 30 minutes. Next, we lasered the microgrooves on the PMMA plate to connect  
352 both milled compartments of each individual microfluidic unit by using an Excimerlaser  
353 (Excistar XS 193 nm, Coherent). The PMMA plate was then washed again by sonication at  
354 room temperature for 30 minutes.

355 Polydimethylsiloxane (PDMS) was prepared in a 1:10 ratio and mixed properly before inducing  
356 vacuum at 0.5 Torr in a vacuum desiccator (Jeio Tech VDC-31) for 30 minutes. After the PDMS  
357 was poured into an empty aluminum basin to cover the ground, we applied vacuum at 0.5 Torr  
358 for 30 minutes to remove air bubbles. The PDMS was cured at room temperature for 48 hours.  
359 We put the PMMA plate on top of the PDMS ground with the milled and lasered structures  
360 showing upwards. Half of each well of the microfluidic units was filled with PDMS before  
361 curing at room temperature for 48 hours. We mixed the epoxy solution in a 1:1 ratio and poured  
362 it over the microfluidic device to cover its surface by at least 1 cm. Vacuum was applied at 0.5



363 Torr for 10 minutes to remove all air bubbles located above the channel side of the microfluidic  
364 device. The epoxy was cured at room temperature for a minimum of 2 hours. We subsequently  
365 detached the epoxy from the PMMA plate via a metallic block that consisted of screw holes in  
366 the intermediate spaces between the individual systems. The epoxy represented a negative  
367 casting mold to produce the microfluidic devices using PDMS.

368 PDMS was prepared as described above. We poured the PDMS into the negative epoxy casting  
369 mold and applied vacuum at 0.5 Torr for 30 minutes. The liquid PDMS was cured at 75 °C for  
370 2 hours to induce the polymerization. We peeled the microfluidic devices from the casting mold  
371 and punched the wells with an 8 mm biopsy punch (DocCheck Shop GmbH) to ensure a  
372 sufficient amount of medium for cell culture. We cleaned customized 115 x 78 x 1 mm glass  
373 slides by sonication (Sonicator Elmasonic S, Elma Schmidbauer GmbH) and subsequently  
374 cleaned them by ethanol before plasma treatment (High Power Expanded Plasma Cleaner,  
375 Harrick Plasma). Plasma was applied at 45 W and 0.5 Torr for 2 minutes to activate the silanol  
376 groups of the glass slides and the microfluidic devices enabling firm attachment.

377 We washed the microfluidic devices with ethanol and then twice with distilled water to remove  
378 any debris. After aspirating the distilled water, except from the inside of the compartments,  
379 0.1 mg/mL of poly-d-lysine solution (PDL) in 0.02 M borate buffer (0.25 % (w/v) borate acid,  
380 0.38 % (w/v) sodium tetraborate in distilled water, pH 8.5) was used for coating at 4 °C  
381 overnight. We aspirated the PDL the next morning, not removing it from the compartments,  
382 and added 50 µg/mL of laminin as a second coating surface for incubation at 4 °C overnight.  
383 At the day of neuron isolation, the microfluidic devices were washed twice with pre-warmed  
384 medium after aspirating the laminin. Immediately prior to cell seeding, we aspirated the  
385 medium from the wells without removing it from the compartments.

386

387 **Experimental animals**

388 Crl:CD1 (ICR) Swiss outbred mice (Charles River) were used. The animals were kept at 20-  
389 22 °C, 30-70 % humidity in a 12-hour/12-hour light/dark cycle and were fed a normal chow  
390 diet (Altromin Spezialfutter GmbH) *ad libitum*. Animal experiments followed the protocol of  
391 the “NIH Guide for the care and use of laboratory animals” and were approved by the  
392 Schleswig-Holstein Ministry for Energy Transition, Agriculture, Environment, Nature and  
393 Digitalization (under the prospective contingent animal license number 2017-07-06 Zille).

394

### 395 **Isolation and culture of primary cortical neurons**

396 We isolated primary cortical neurons (PCNs) from murine E14 embryos after decapitation as  
397 previously described<sup>28</sup>. We seeded the PCNs at a density of 10,000 cells/mm<sup>2</sup> in 5 µL  
398 MEM+Glutamax medium into one compartment (soma compartment) of each microfluidic unit  
399 of the device. The cells adhered at 37 °C for 30 minutes. In order to promote the growth of the  
400 axons in one direction into the other compartment (axonal compartment) by medium microflux,  
401 150 µL of MEM+Glutamax medium were applied to the well of the soma compartment, while  
402 100 µL were added to the well of the axonal compartment. PCNs were cultured at 37 °C in a  
403 humidified 5 % CO<sub>2</sub> atmosphere. We changed from MEM+Glutamax medium to Neurobasal  
404 Plus Medium containing 2 % B-27 Plus Supplement, 1 mM sodium pyruvate and 1 %  
405 penicillin/streptomycin at day-in vitro (DIV) 1. The volume differences among the wells  
406 ensured the microflux for the directional axonal growth over the following days.

407

### 408 **Immunofluorescence**

409 Soma and axonal compartments in the microfluidic units were fixed at room temperature for  
410 1 hour in 4 % formaldehyde solution in PBS. They were washed twice with PBS and  
411 permeabilized with blocking solution (2 % BSA, 0.5% Triton-X-100 and 1x PBS) at room  
412 temperature for 1 hour. We incubated the neurons/axons on both compartments with primary  
413 antibodies against synaptophysin (1:250) and MAP2 (1:4000) at 4 °C overnight. The next day,

414 both compartments were washed three times with PBS and incubated with the secondary  
415 antibodies anti-mouse Alexa Fluor 546 (1:500) and anti-rabbit Alexa Fluor 488 (1:500) at room  
416 temperature for 1 hour. After washing three times with PBS, both compartments were incubated  
417 with DAPI (1  $\mu\text{g}/\text{mL}$ ) for nuclear counterstaining at room temperature for 10 minutes. Both  
418 compartments were finally washed three times with PBS prior to fluorescence microscopy.

419

#### 420 **Selection of microfluidic units for hemin treatment and time-lapse recording**

421 At DIV 6 or 7, microfluidic devices were considered for recording if they met the following  
422 inclusion criteria: i) axon growth through at least 80 % of all microgrooves and ii) axon length  
423 of at least 150  $\mu\text{m}$  from the end of the microgrooves. Microfluidic units were randomly assigned  
424 to experimental conditions.

425

#### 426 **Time-lapse recording of axonal degeneration**

427 Microfluidic units were randomly selected and axons were treated with 0 (vehicle), 50, 100,  
428 and 200  $\mu\text{M}$  hemin. For the treatment, the media was removed from the wells of the  
429 microfluidic units; hemin was diluted in the collected media and added back to the respective  
430 wells. The media volume between the two wells was equalized during the treatment to prevent  
431 any microflux. We started the recordings at 1 hour after treatment to allow for the adjustment  
432 of the well plates to the humidity of the incubation chamber of the microscope and the setup of  
433 the recording positions. We recorded AxD with a 30-minutes interval for 24 hours using an  
434 Olympus IX81 time-lapse microscope (Olympus Deutschland GmbH) with a 10X objective  
435 (0.3 NA Ph1) at 37  $^{\circ}\text{C}$ , 5 %  $\text{CO}_2$  and 65 % humidity.

436

#### 437 **Live cell fluorescent staining**

438 To evaluate axonal vitality, we washed the axonal compartment once with PBS and incubated  
439 the axonal compartment with calcein AM (4  $\mu$ M) for 30 minutes at 37 °C at the end of the time-  
440 lapse recording or in 4-hour intervals upon hemin treatment.

441

#### 442 **Training of the EntireAxon CNN for the segmentation of phase-contrast microscopic** 443 **images**

444 We trained the EntireAxon CNN for the image-wise semantic segmentation of AxD features.  
445 To this end, we adapted a standard u-net with ResNet-50 encoder<sup>23</sup> to automatically determine  
446 the class probability for each pixel of an input image. Our segmentation aimed to classify each  
447 pixel of a microscopic image of a time-lapse recording into one of four classes: ‘background’,  
448 ‘axon’, ‘axonal swelling’, and ‘axonal fragment’.

449 For the training dataset, we selected 33 images and created corresponding image labels (masks)  
450 using GIMP (v.2.10.14, RRID:SCR\_003182). For each image, a label image with the same  
451 height and width was created, in which each pixel value denotes a pixel class. Specifically, the  
452 classes ‘background’, ‘axon’, ‘axonal swelling’, and ‘axonal fragment’ had the values 0, 1, 2,  
453 and 3, respectively. For each pixel of the input image, we retained 4 values that are the  
454 probability distribution of the pixel over the 4 classes. To create a segmentation map, we  
455 assigned each pixel the most probable class. During training, the CNN observed an input image,  
456 produced an output and compared this output to the label. Via backpropagation, the weights of  
457 the network were adapted so that the output better fitted the label. The pixelwise loss function,  
458 from which the weight changes were derived, was the cross-entropy loss:

$$459 \quad \text{Loss}(P, Y) = -\sum_{x,y,c} Y(x, y, c) \log(P(x, y, c));$$

460 With  $P(x, y, c)$  and  $Y(x, y, c)$  being the probability of class  $c$  at pixel  $(x, y)$  for the prediction  
461 and ground truth of the network, respectively.

462

463 We trained a mean ensemble consisting of eight neural networks for 180 epochs using the Adam  
464 optimizer, a batch size of four and a learning rate of 0.001 that decreased by a factor of ten after  
465 every 60 epochs. The input images were standardized by the image-net mean and standard  
466 deviation<sup>42</sup>. For data augmentation, we used random cropping (size 512 x 512), image flipping  
467 along the horizontal axis and rotation by a random angle between -90° and +90°.

468

### 469 **Validation of the EntireAxon CNN compared to human experts**

470 To measure how well the EntireAxon CNN segments unknown images, we used a second  
471 validation set comprising eight images that were labeled by three human experts. Importantly,  
472 the EntireAxon CNN did not update its parameters during training to fit the validation set, but  
473 only used the training set.

474 For each image, the EntireAxon CNN inferred a segmentation. We generated a binary mask  
475 from the prediction of the network, where 1 denotes the respective class and 0 all other classes.  
476 We computed a binary label mask in the same manner. We counted the true positive (TP), false  
477 positive (FP), and false negative (FN) pixels and computed the recall (sensitivity) and  
478 precision<sup>43</sup>:

$$479 \quad \text{Recall} = \frac{TP}{TP + FN}$$

$$480 \quad \text{Precision} = \frac{TP}{TP + FP}$$

481 Recall and precision were calculated for each class separately on each validation image. The  
482 mean recall and precision over all eight validation images was determined subsequently.

483 A mean of 96.42 % of pixels in the axonal images were ‘background’ pixels, while only 2.77 %  
484 represented the class ‘axon’, 0.58 % ‘axonal swelling’, and 0.23 % ‘axonal fragment’ pixels.

485 This reflects a challenging degree of class imbalance, where the probability of having any  
486 positives for a class in a validation image is low. Thus, we did not use the computed recall and  
487 precision of the individual images or the mean recall and precision to compute the mean F1

488 score, i.e. the harmonic mean of recall and precision. This has been shown to lead to bias,  
489 especially when a high degree of class imbalance is present in the dataset<sup>43</sup> as it may result in  
490 undefined values for an image for recall (due to the absence of TP), precision (in case the CNN  
491 does not recognize the few positives), and F1 score (in case either recall or precision are  
492 undefined). To avoid bias, we computed the total TP, FP, and FN of all validation images from  
493 which we calculated the mean F1 score<sup>43</sup>:

$$494 \quad \text{mean F1 score} = \frac{2 * TP_{total}}{2 * TP_{total} + FP_{total} + FN_{total}}$$

495 In addition, we computed a consensus label between human expert 1 and 2, 1 and 3 as well as  
496 2 and 3 and compared the EntireAxon CNN versus the remaining expert (human expert 3, 2,  
497 and 1, respectively) to the consensus labels. Mean F1 scores for all classes were computed as  
498 described above.

499

## 500 **Image preprocessing**

501 Prior to the analysis of AxD after hemin exposure, we preprocessed the time-lapse recordings  
502 in ImageJ (v1.52a, RRID: RRID:SCR\_003070) using a custom-written macro. Specifically,  
503 each individual recording was converted from a 16-bit into an 8-bit recording to make it  
504 compatible with the ImageNet (8-bit) pre-trained ResNet-50. The recording was aligned  
505 automatically with the ImageJ plug-in “Linear Stack Alignment with SIFT” as described  
506 previously<sup>44</sup>. The following settings were used: initial Gaussian blur of 1.6 pixel, 3 steps per  
507 scale octave, minimum image size of 64 pixel, maximum image size of 1024 pixel, feature  
508 descriptor size of 4, 8 feature descriptor orientation bins, closest/next closest ratio of 0.92,  
509 maximal alignment error of 25 pixel; inlier ratio of 0.05, expected transformation as rigid,  
510 “interpolate” and “show info” checked. Black edges appearing on the recording after alignment  
511 were cropped.

512

### 513 **AxD analysis using the EntireAxon CNN**

514 All recordings of AxD after hemin exposure were automatically analyzed by the trained  
515 EntireAxon CNN, which classified each pixel as one of the four different classes ‘background’,  
516 ‘axon’, ‘axonal swelling’, and ‘axonal fragment. For each experimental condition (i.e. hemin  
517 concentration), the sum percentage of all pixels per class on all images of that experimental day  
518 were added at each time point ( $Axon_{t_{1.5-24h}}$ ,  $Axonal\ swelling_{t_{1.5-24h}}$ ,  $Axonal\ fragment_{t_{1.5-24h}}$ ). To  
519 determine the changes for the classes ‘axon’, ‘axonal swelling’, and ‘axonal fragment’ over  
520 time, we calculated the sum percentage of pixels for all given time points ( $t_i$  with  $i = 1.5$  to  
521 24 hours) of the corresponding class over the sum of the pixels of all three classes at baseline:

$$522 \quad \textit{normalized 'class' area} (t_i)$$
$$523 \quad = \frac{\textit{'Class'}_{t_i}}{Axon_{t_{1.5h}} + Axonal\ swelling_{t_{1.5h}} + Axonal\ fragment_{t_{1.5h}}} * 100$$

524

### 525 **Classification of the morphological patterns of AxD using attention-based RNN**

526 We used the segmentation videos to identify four morphological patterns of AxD: i) granular,  
527 ii) retraction, iii) swelling, and iv) transport degeneration. To reduce the dimensions of the  
528 input, each frame was converted into a histogram. To compute a histogram for a frame  $t_i$ , we  
529 compared the pixels of the frames  $t_i$  and  $t_{i+1}$ . Each pixel was assigned into one of 16 classes that  
530 consisted of the pairwise tuples  $(c_1, c_2) \in \{0,1,2,3\}^2$  of the four segmentation classes. For  
531 example, the class (background, axon) means that in frame  $t_i$ , the pixel was classified as  
532 background while in frame  $t_{i+1}$ , it was an axon pixel. For T time steps, we therefore computed  
533 T-1 histograms. Additionally, we normalized each histogram to sum up to 1:

$$534 \quad H(t_i, (c_1, c_2)) := H_0(t_i, (c_1, c_2)) / \sum_{a,b} H_0(t_i, (a, b))$$

535 Note that, the histograms were computed over small patches (height and width < 90 pixels)  
536 during training and during inference on windows of size 32x32 pixels.

537 We used an encoder-decoder RNN with attention<sup>45</sup>. The encoder  $f_{enc}$  consisted of a gated  
538 recurrent unit (GRU) that obtained the histogram time sequence  $H$  as input. The encoder  
539 computed the hidden representation of the histograms:

$$540 \quad V = f_{enc}(H); V \in \mathbb{R}^{T \times d}, H \in \mathbb{R}^{T \times 16}$$

541 For our purpose, we used an architecture that was able to base the decision for a degeneration  
542 class on the previous class predictions. To this end, the output  $\vec{o}_i$  was computed iteratively in  
543  $C+1$  steps as a sum of the previous output and the output of the decoder  $f_{dec}$ :

$$544 \quad \vec{o}_i = \vec{o}_{i-1} + f_{dec}(\sigma(\vec{o}_{i-1}), \vec{s}_{i-1}); \vec{o} \in \mathbb{R}^C, \vec{s}_{i-1} \in \mathbb{R}^d$$

$$545 \quad f_{dec}(\sigma(\vec{o}_{i-1}), \vec{s}_{i-1}) = W_{out} \vec{z}_i; W_{out} \in \mathbb{R}^{C \times d}$$

546  $C$  is the number of degeneration classes (4) and  $d$  is the hidden dimension (we used 256);  $i =$   
547  $1, \dots, C + 1$ .  $\sigma$  is the sigmoid function. The decoder employed a GRU that depended on the  
548 context vector  $\vec{c}_i$  and the hidden state vector  $\vec{s}_{i-1}$ :

$$549 \quad \vec{z}_i, \vec{s}_i = GRU(\vec{c}_i, \vec{s}_{i-1}); \vec{z}_i \in \mathbb{R}^d$$

550 The context vector is a weighted sum of the encoder representations. At each iteration, these  
551 weights can change, enabling the network to focus on different time-steps. We assumed that a  
552 specific pattern of degeneration happened only in a limited number of time frames that were  
553 smaller than the whole input video. The weights depended on the current state of the decoder  
554 and the current output:

$$555 \quad \vec{c}_i = V^T \vec{\alpha}_i; \vec{\alpha}_i \in \mathbb{R}^T$$

$$556 \quad \vec{\alpha}_i = \text{Softmax}(W_{att} [\vec{s}_{i-1}, \text{ReLU}(W_{in} \vec{o}_{i-1})]); W_{att} \in \mathbb{R}^{T \times 2d}, W_{in} \in \mathbb{R}^{d \times C}$$

557 Here,  $[\vec{a}, \vec{b}]$  is the concatenation of two vectors. The final output  $y$  is normalized by the sigmoid  
558 function:

$$559 \quad y = \sigma(\vec{o}_{C+1}) \in [0, 1]^C.$$

560 Apart from the weights used by the GRUs,  $W_{in}$ ,  $W_{att}$ , and  $W_{out}$  are learnable weights.



561 The EntireAxon RNN was trained with 162 images for 60 epochs using the lamb optimizer<sup>46</sup>  
562 with a batch size of 128. We used a learning rate of 0.01 that was reduced by a factor of ten  
563 every 15 epochs and an additional weight decay of 0.0001. The two GRUs (encoder and  
564 decoder) contained three layers, and we used dropout with a p-value of 0.9. To increase the  
565 RNN robustness against varying axon thickness, we also added eroded versions of the  
566 segmentation data using a cross-shape as kernel with the sizes three, five, and seven.  
567 Accordingly, each image existed six times in the dataset: three eroded versions and three  
568 unchanged copies, to keep a 50 % chance of having the original image for training.

569

#### 570 **Ten-fold cross-validation of the RNN**

571 To validate the RNN, we used ten-fold cross-validation<sup>47</sup>. For the given 162 training images,  
572 we determined ten separate test sets (nine sets containing 17 images and one set including nine  
573 images) and, each time, trained with the remaining 145 (153) images as described above. Mean  
574 recall, precision, and F1 score over the ten sets were determined as described above.

575

#### 576 **Analysis of morphological pattern of AxD using the EntireAxon RNN**

577 All segmentations of AxD after hemin exposure were automatically analyzed with the trained  
578 EntireAxon RNN, which predicted the occurrence of the four morphological patterns of AxD  
579 in a pixel-wise manner. To note: A pixel can be predicted to belong to 0, 1 or multiple  
580 morphological patterns. Only pixels previously identified as degenerated over time were  
581 considered by applying a ‘fragmentation mask’ that included all no-background pixels that  
582 changed to either background or fragment during the recording time.

583 For each experimental condition (i.e. hemin concentration), the percentage of the occurrence of  
584 each morphological pattern was calculated as the sum of all pixels per morphological pattern  
585 on all images of that experimental day divided by the ‘fragmentation mask’ as follows:

586 *'morphological pattern'* [%]

$$587 = \frac{\sum \text{pixel of morphological pattern}_i}{\sum \text{pixel no background} \rightarrow \text{background or fragment}} * 100$$

588

### 589 **Statistical analysis**

590 Normality was evaluated with the Kolmogorov-Smirnov test, variance homogeneity using the  
591 Levené test, and sphericity by the Mauchly test. When the data were normally distributed and  
592 variance homogeneity was met, one-way ANOVA followed by the Bonferroni post hoc test  
593 was performed. In case the data were not normally distributed, the Kruskal-Wallis test was  
594 performed for multiple comparisons of independent groups followed by the post hoc Mann-  
595 Whitney U test with  $\alpha$ -correction according to Bonferroni to adjust for the inflation of type I  
596 error due to multiple testing. For the repeated testing with covariates, a repeated measures  
597 ANOVA was performed with Greenhouse-Geisser adjustment if sphericity was not given. Data  
598 are represented as mean  $\pm$  standard deviation (SD) except for the nonparametric data of the  
599 AUC for axonal fragments as well as retraction and swelling degeneration, where medians are  
600 given. A value of  $p < 0.05$  was considered statistically significant. For the Kruskal-Wallis test  
601 followed by Mann-Whitney U,  $p = 0.05/k$  was used, with  $k$  as the number of single hypotheses.  
602  $K = 3$  for AUC analyses (comparison of three different concentrations of hemin vs. 0  $\mu\text{M}$  hemin),  
603 thus  $\alpha = 0.0167$  was considered statistically significant.  $K = 6$  for swelling degeneration  
604 (comparison of four different concentrations of hemin against each other), thus  $\alpha = 0.0083$  was  
605 considered statistically significant. The detailed statistical analyses can be found in the **suppl.**  
606 **Tables 1-3**. All statistical analyses were performed with IBM SPSS version 23  
607 (RRID:SCR\_002865).  
608

## 609 **Acknowledgments**

610 This work was supported by a Fraunhofer MEF grant (Project number 600199) to M.Z.

611

## 612 **Author contributions**

613 M.Z. designed the experiments. A. Palumbo, A. Pabst and M.Z. designed the device. A.

614 Palumbo, A. Pabst, S.P., R.S., C.K., and N.K. carried out the fabrication of the device. S.K.L.

615 performed the immunostaining of the somata and axons and analyzed the respective data. P.G.

616 and A.M.M. developed the deep learning tool, P.G., L.H., and L.B. developed the algorithms

617 to retrieve the output. A. Palumbo, S.K.L. and L.H. labeled the images for the deep learning

618 training and validation. A. Palumbo and C.F. performed the time-lapse recordings of AxD. A.

619 Palumbo conducted the live cell imaging, the determination of the morphological patterns of

620 AxD and analyzed the data for the respective experiments. A. Palumbo, P.G., A.M.M., J.B.,

621 and M.Z. discussed and interpreted the data. M.Z. performed the statistical analysis. A.

622 Palumbo, M.I. and M.Z. performed the graphical artwork. A. Palumbo, P.G., and M.Z. wrote

623 the manuscript. All authors discussed and commented on the final version of the manuscript.

624

## 625 **Competing interest statement**

626 A. Palumbo, P.G., and M.Z. declare that they have filed a patent for the microfluidic device and

627 the EntireAxon deep learning algorithm to quantify axonal degeneration (European Patent

628 Office, file number: 20152016.0, in revision). All other authors declare no conflict of interest.

629

## 630 **Data availability**

631 The data and code are available upon reasonable request to the corresponding authors.

632

## 633 References

- 634 1. Luo, L. & O’Leary, D. D. M. Axon Retraction and Degeneration in Development and  
635 Disease. *Annu. Rev. Neurosci.* **28**, 127–156 (2005).
- 636 2. Lingor, P., Koch, J. C., Tönges, L. & Bähr, M. Axonal degeneration as a therapeutic  
637 target in the CNS. *Cell Tissue Res* **349**, 289–311 (2012).
- 638 3. Salvadores, N., Sanhueza, M., Manque, P. & Court, F. A. Axonal Degeneration during  
639 Aging and Its Functional Role in Neurodegenerative Disorders. *Front. Neurosci.* **11**, 451  
640 (2017).
- 641 4. Pease, S. E. & Segal, R. A. Preserve and protect: maintaining axons within functional  
642 circuits. *Trends in Neurosciences* **37**, 572–582 (2014).
- 643 5. Neukomm, L. J. & Freeman, M. R. Diverse cellular and molecular modes of axon  
644 degeneration. *Trends in Cell Biology* **24**, 515–523 (2014).
- 645 6. Bishop, D. L., Misgeld, T., Walsh, M. K., Gan, W.-B. & Lichtman, J. W. Axon  
646 Branch Removal at Developing Synapses by Axosome Shedding. *Neuron* **44**, 651–661  
647 (2004).
- 648 7. Cavanagh, J. B. The ‘dying back’ process. A common denominator in many naturally  
649 occurring and toxic neuropathies. *Arch. Pathol. Lab. Med.* **103**, 659–664 (1979).
- 650 8. Coleman, M. P. Axon degeneration mechanisms: commonality amid diversity. *Nat*  
651 *Rev Neurosci* **6**, 889–898 (2005).
- 652 9. Beirowski, B. *et al.* The progressive nature of Wallerian degeneration in wild-type and  
653 slow Wallerian degeneration (Wlds) nerves. *BMC Neurosci* **6**, 6 (2005).
- 654 10. Nikić, I. *et al.* A reversible form of axon damage in experimental autoimmune  
655 encephalomyelitis and multiple sclerosis. *Nat Med* **17**, 495–499 (2011).
- 656 11. Yong, Y. *et al.* p75NTR and DR6 Regulate Distinct Phases of Axon Degeneration  
657 Demarcated by Spheroid Rupture. *J. Neurosci.* **39**, 9503–9520 (2019).
- 658 12. Saxena, S. & Caroni, P. Mechanisms of axon degeneration: From development to  
659 disease. *Progress in Neurobiology* **83**, 174–191 (2007).
- 660 13. Wang, J. T., Medress, Z. A. & Barres, B. A. Axon degeneration: Molecular  
661 mechanisms of a self-destruction pathway. *J Cell Biol* **196**, 7–18 (2012).
- 662 14. Sasaki, Y., Vohra, B. P. S., Lund, F. E. & Milbrandt, J. Nicotinamide Mononucleotide  
663 Adenylyl Transferase-Mediated Axonal Protection Requires Enzymatic Activity But Not  
664 Increased Levels of Neuronal Nicotinamide Adenine Dinucleotide. *Journal of Neuroscience*  
665 **29**, 5525–5535 (2009).
- 666 15. Becker, T. & Madany, A. Morphology-based Features for Adaptive Mitosis Detection  
667 of In Vitro Stem Cell Tracking Data. *Methods Inf Med* **51**, 449–456 (2012).
- 668 16. Pool, M., Thiemann, J., Bar-Or, A. & Fournier, A. E. NeuriteTracer: A novel ImageJ  
669 plugin for automated quantification of neurite outgrowth. *Journal of Neuroscience Methods*  
670 **168**, 134–139 (2008).
- 671 17. Ho, S.-Y. *et al.* NeurphologyJ: An automatic neuronal morphology quantification  
672 method and its application in pharmacological discovery. *BMC Bioinformatics* **12**, 230  
673 (2011).
- 674 18. Li, Y. *et al.* AxonQuant: A Microfluidic Chamber Culture-Coupled Algorithm That  
675 Allows High-Throughput Quantification of Axonal Damage. *Neurosignals* **22**, 14–29 (2014).
- 676 19. Campenot, R. B. Development of sympathetic neurons in compartmentalized cultures.  
677 *Developmental Biology* **93**, 13–21 (1982).
- 678 20. Park, J. W., Vahidi, B., Taylor, A. M., Rhee, S. W. & Jeon, N. L. Microfluidic culture  
679 platform for neuroscience research. *Nat Protoc* **1**, 2128–2136 (2006).
- 680 21. Dehmelt, L. & Halpain, S. The MAP2/Tau family of microtubule-associated proteins.  
681 *Genome Biol* **6**, 204 (2004).
- 682 22. Wiedenmann, B. & Franke, W. W. Identification and localization of synaptophysin, an

- 683 integral membrane glycoprotein of Mr 38,000 characteristic of presynaptic vesicles. *Cell* **41**,  
684 1017–1028 (1985).
- 685 23. Ronneberger, O., Fischer, P. & Brox, T. U-Net: Convolutional Networks for  
686 Biomedical Image Segmentation. Preprint at <https://arxiv.org/abs/1505.04597> (2015).
- 687 24. He, K., Zhang, X., Ren, S. & Sun, J. Deep Residual Learning for Image Recognition.  
688 Preprint at <https://arxiv.org/abs/1512.03385> (2015).
- 689 25. Dietterich, T. G. Ensemble Methods in Machine Learning. in *Multiple Classifier*  
690 *Systems* vol. 1857 1–15 (Springer Berlin Heidelberg, 2000).
- 691 26. Huang, H.-K. *et al.* Mixture of deep CNN-based ensemble model for image retrieval.  
692 in *2016 IEEE 5th Global Conference on Consumer Electronics* 1–2 (IEEE, 2016).  
693 doi:10.1109/GCCE.2016.7800375.
- 694 27. Vuola, A. O., Akram, S. U. & Kannala, J. Mask-RCNN and U-Net Ensembled for  
695 Nuclei Segmentation. in *2019 IEEE 16th International Symposium on Biomedical Imaging*  
696 *(ISBI 2019)* 208–212 (IEEE, 2019). doi:10.1109/ISBI.2019.8759574.
- 697 28. Zille, M. *et al.* Neuronal Death After Hemorrhagic Stroke In Vitro and In Vivo Shares  
698 Features of Ferroptosis and Necroptosis. *Stroke* **48**, 1033–1043 (2017).
- 699 29. Cui, Y. *et al.* Axonal degeneration in an in vitro model of ischemic white matter  
700 injury. *Neurobiology of Disease* **134**, 104672 (2020).
- 701 30. Venkatasubramanian, C. *et al.* Natural History and Prognostic Value of Corticospinal  
702 Tract Wallerian Degeneration in Intracerebral Hemorrhage. *JAMA* **2**, (2013).
- 703 31. Tao, C., Hu, X., Li, H. & You, C. White Matter Injury after Intracerebral Hemorrhage:  
704 Pathophysiology and Therapeutic Strategies. *Front. Hum. Neurosci.* **11**, 422 (2017).
- 705 32. Chen, X. *et al.* The Impact of Intracerebral Hemorrhage on the Progression of White  
706 Matter Hyperintensity. *Front. Hum. Neurosci.* **12**, 471 (2018).
- 707 33. Hemorrhagic Stroke Academia Industry (HEADS) Roundtable Participants. Basic and  
708 Translational Research in Intracerebral Hemorrhage: Limitations, Priorities, and  
709 Recommendations. *Stroke* **49**, 1308–1314 (2018).
- 710 34. Nikolaev, A., McLaughlin, T., O’Leary, D. D. M. & Tessier-Lavigne, M. APP binds  
711 DR6 to trigger axon pruning and neuron death via distinct caspases. *Nature* **457**, 981–989  
712 (2009).
- 713 35. Maor-Nof, M. *et al.* Axonal Degeneration Is Regulated by a Transcriptional Program  
714 that Coordinates Expression of Pro- and Anti-degenerative Factors. *Neuron* **92**, 991–1006  
715 (2016).
- 716 36. Pease-Raissi, S. E. *et al.* Paclitaxel Reduces Axonal Bclw to Initiate IP3R1-Dependent  
717 Axon Degeneration. *Neuron* **96**, 373–386.e6 (2017).
- 718 37. Tang-Schomer, M. D., Johnson, V. E., Baas, P. W., Stewart, W. & Smith, D. H.  
719 Partial interruption of axonal transport due to microtubule breakage accounts for the  
720 formation of periodic varicosities after traumatic axonal injury. *Experimental Neurology* **233**,  
721 364–372 (2012).
- 722 38. Van Laar, V., Arnold, B. & Berman, S. Primary Embryonic Rat Cortical Neuronal  
723 Culture and Chronic Rotenone Treatment in Microfluidic Culture Devices. *BIO-PROTOCOL*  
724 **9**, (2019).
- 725 39. Hosmane, S., Yang, I. H., Ruffin, A., Thakor, N. & Venkatesan, A. Circular  
726 compartmentalized microfluidic platform: Study of axon–glia interactions. *Lab Chip* **10**, 741  
727 (2010).
- 728 40. Biffi, E. *Microfluidic and Compartmentalized Platforms for Neurobiological*  
729 *Research*. (2015).
- 730 41. Grüning, P., Palumbo, A., Zille, M., Barth, E. & Madany Mamlouk, Amir. A task-  
731 dependent active learning method for axon segmentation with CNNs. *Proc AUTOMED* **1**,  
732 (2020).
- 733 42. Deng, J. *et al.* ImageNet: A large-scale hierarchical image database. in *2009 IEEE*

- 734 *Conference on Computer Vision and Pattern Recognition* 248–255 (IEEE, 2009).  
735 doi:10.1109/CVPR.2009.5206848.
- 736 43. Forman, G. & Scholz, M. Apples-to-apples in cross-validation studies: pitfalls in  
737 classifier performance measurement. *SIGKDD Explor. Newsl.* **12**, 49 (2010).
- 738 44. Lowe, D. G. Distinctive Image Features from Scale-Invariant Keypoints. *International*  
739 *Journal of Computer Vision* **60**, 91–110 (2004).
- 740 45. Bahdanau, D., Cho, K. & Bengio, Y. Neural Machine Translation by Jointly Learning  
741 to Align and Translate. Preprint at <https://arxiv.org/abs/1409.0473> (2016).
- 742 46. You, Y. *et al.* Large Batch Optimization for Deep Learning: Training BERT in 76  
743 minutes. Preprint at <https://arxiv.org/abs/1904.00962> (2020).
- 744 47. Hastie, T., Tibshirani, R. & Friedman, J. *The Elements of Statistical Learning*.  
745 (Springer New York, 2009). doi:10.1007/978-0-387-84858-7.  
746

747 **Figures**

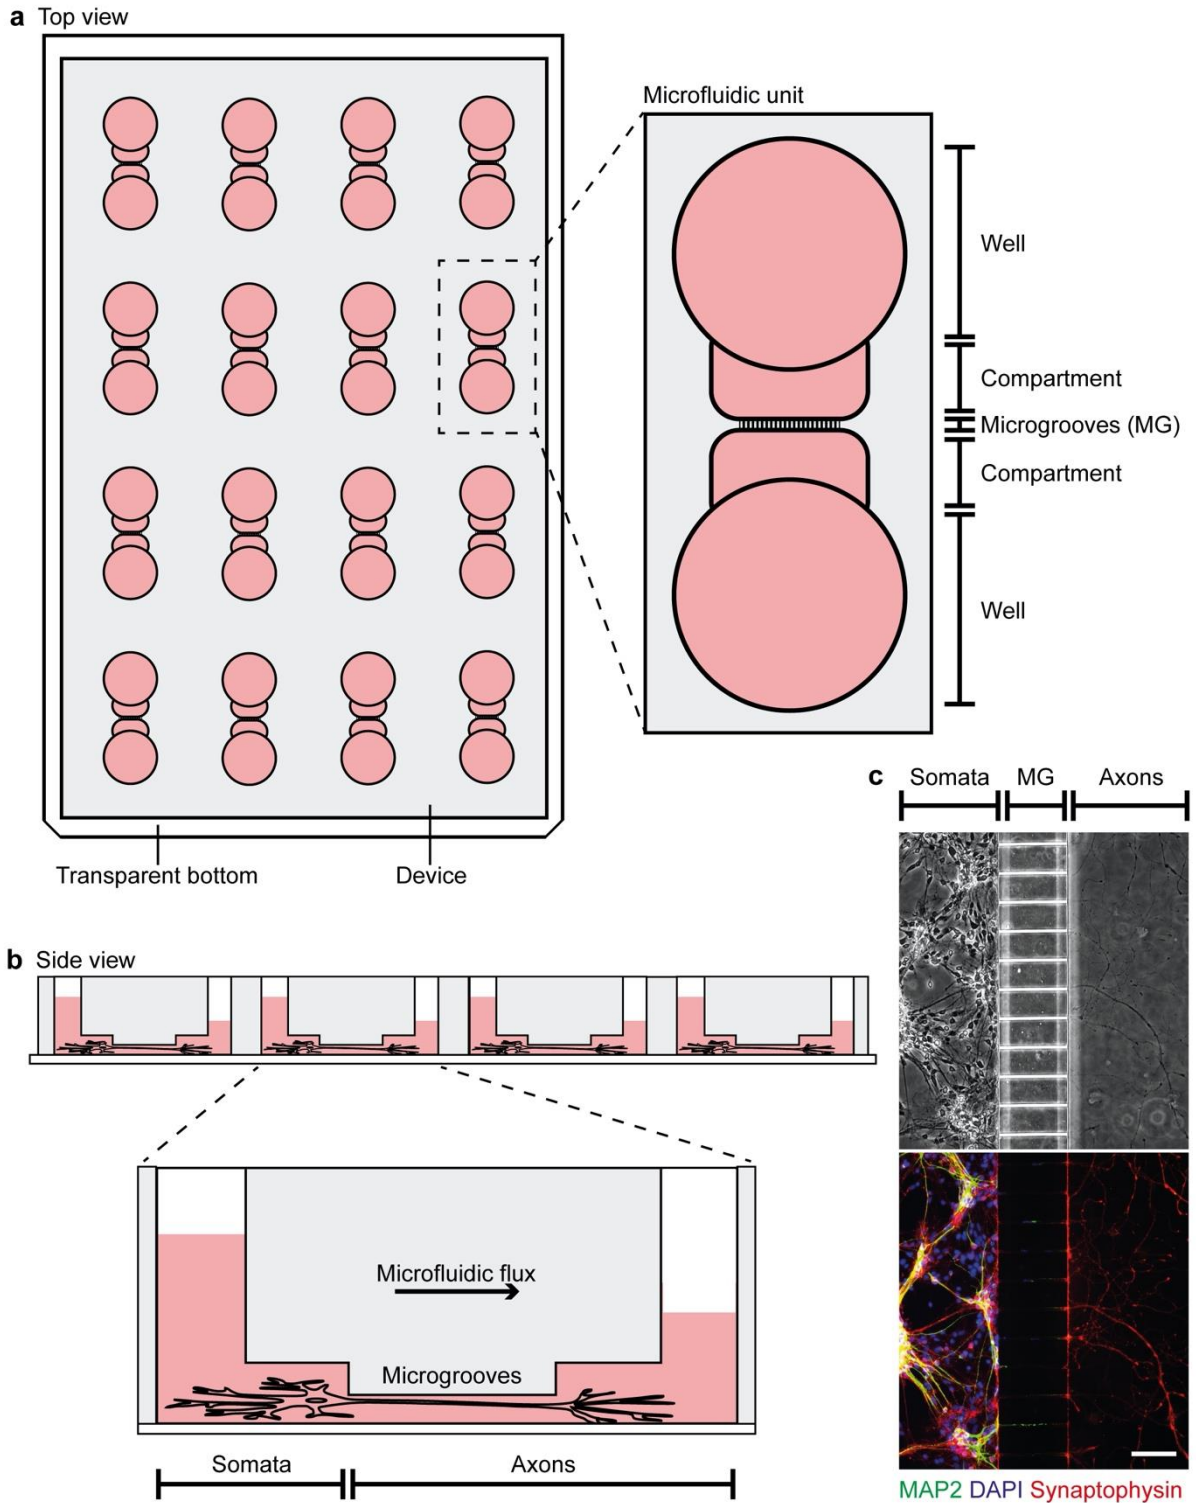

748  
749  
750  
751  
752  
753  
754  
755  
756

**Fig. 1 Microfluidic device for the high-throughput cultivation of axons.** **a**, The microfluidic device incorporates 16 individual microfluidic units for axon cultivation. One microfluidic unit consists of two wells that are connected through compartments and microgrooves (MG). **b**, Primary cortical neurons are seeded into the soma compartment from which their axons grow through the MG into the axon compartment. Directed growth is supported by culture medium microflux due to different medium volumes between the two wells. **c**, Phase-contrast image of axons that were spatially separated from their somata by the MG at *day in vitro* 7, which we confirmed by immunofluorescence staining of dendrites using microtubule-associated protein 2 (MAP2, green) and axons using synaptophysin (red). DAPI (blue) was used for nuclear counterstaining (top). Scalebar, 100  $\mu\text{m}$ .

757

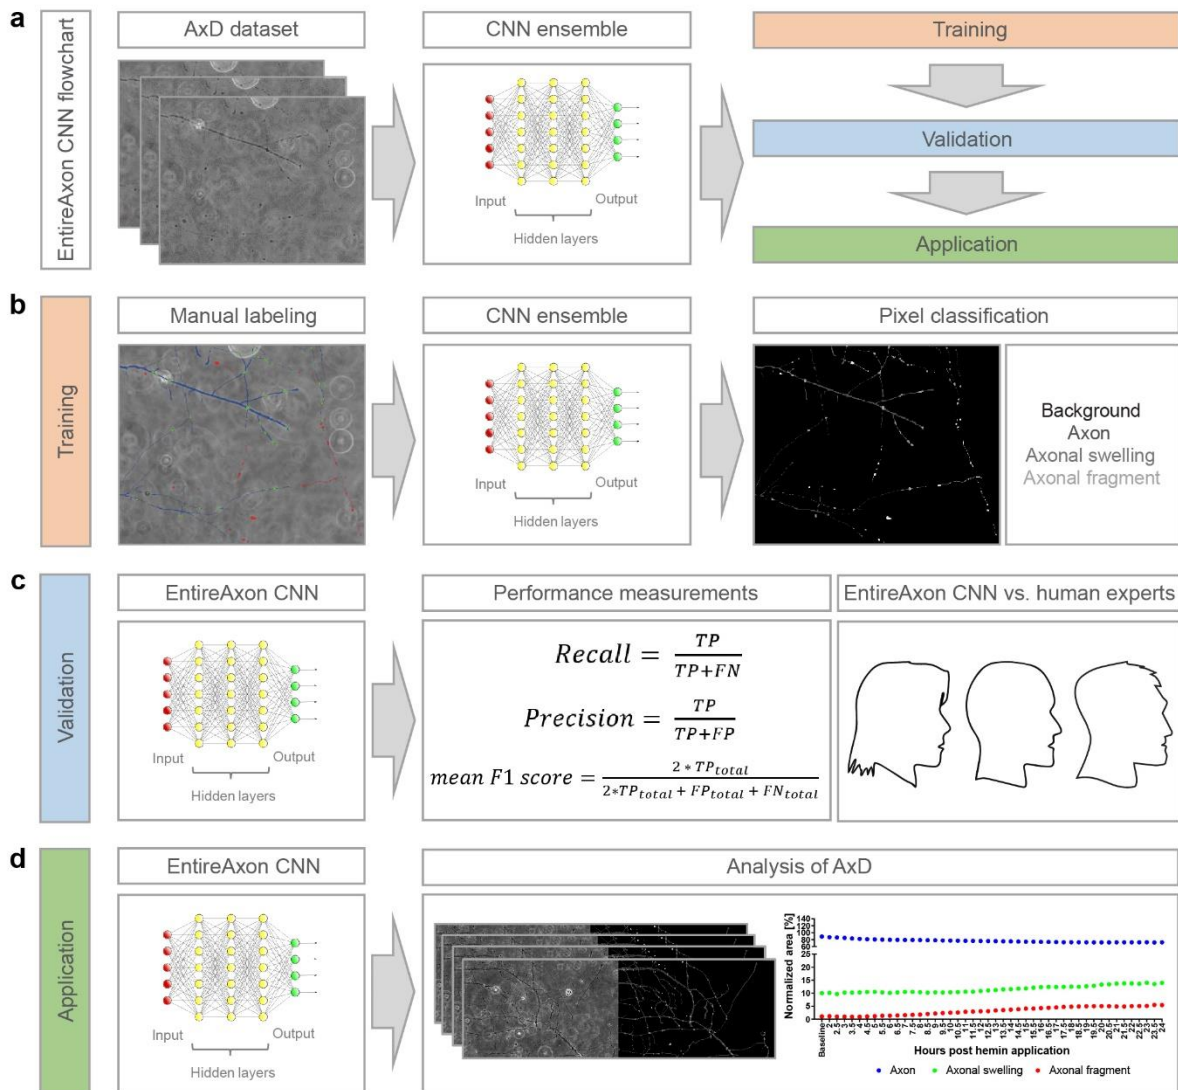

758  
759  
760  
761  
762  
763  
764  
765  
766  
767

**Fig. 2 EntireAxon convolutional neural network (CNN) for the high-throughput analysis of axonal degeneration (AxD).** **a**, The flow chart of the EntireAxon CNN. The AxD data was separated into training, validation, and testing data. **b**, We manually labeled the training data to segment each pixel into the four classes ‘background’, ‘axon’, ‘axonal swelling’, and ‘axonal fragment’, which are displayed in the output image in black, dark grey, intermediate grey, and light grey, respectively. We trained an ensemble comprising 8 CNNs to segment the four classes. **c**, The EntireAxon CNN was validated with a separate validation dataset to assess its performance (recall, precision, and mean F1 score), which was compared to human experts. **d**, The EntireAxon CNN was applied to data on AxD induced by the exposure of hemin, which is used to model of hemorrhagic stroke *in vitro*.



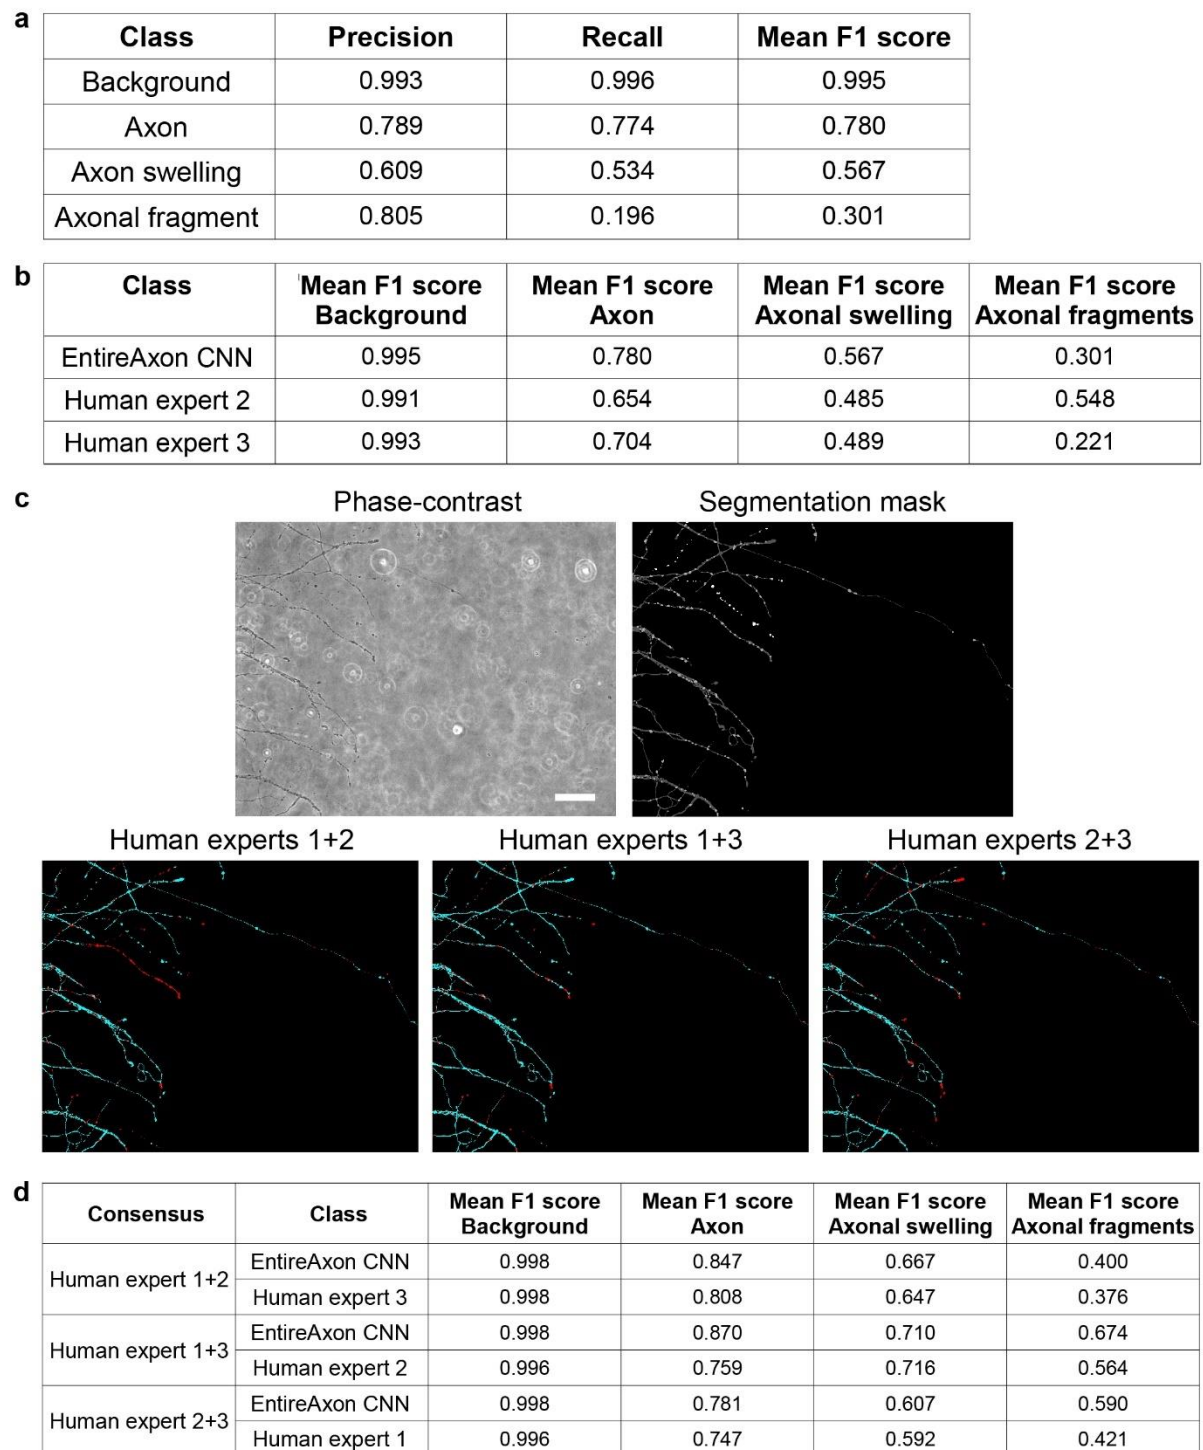

768

769

770

771

772

773

774

775

776

777

**Fig. 3 The EntireAxon convolutional neural network (CNN) sensitively and specifically recognizes features of axonal degeneration (AxD).** **a**, Validation of the EntireAxon CNN performance for all four classes ‘background’, ‘axon’, ‘axonal swelling’ and ‘axonal fragment’ in before unseen phase-contrast microscopic images. **b**, Comparison of the mean F1 scores between the EntireAxon CNN and two human experts on the ground truth (human expert 1 who also labeled the training images) to recognize background, axon, axonal swelling and axonal fragments. **c**, Phase-contrast validation image, its EntireAxon CNN segmentation mask, and the consensus labeling masks of two human experts that show the overlap (cyan) or difference (red) between the labels. Scalebar, 100  $\mu$ m. **d**, Comparison of the mean F1 scores between the EntireAxon CNN and the human expert on the consensus labeling of the other two human experts.

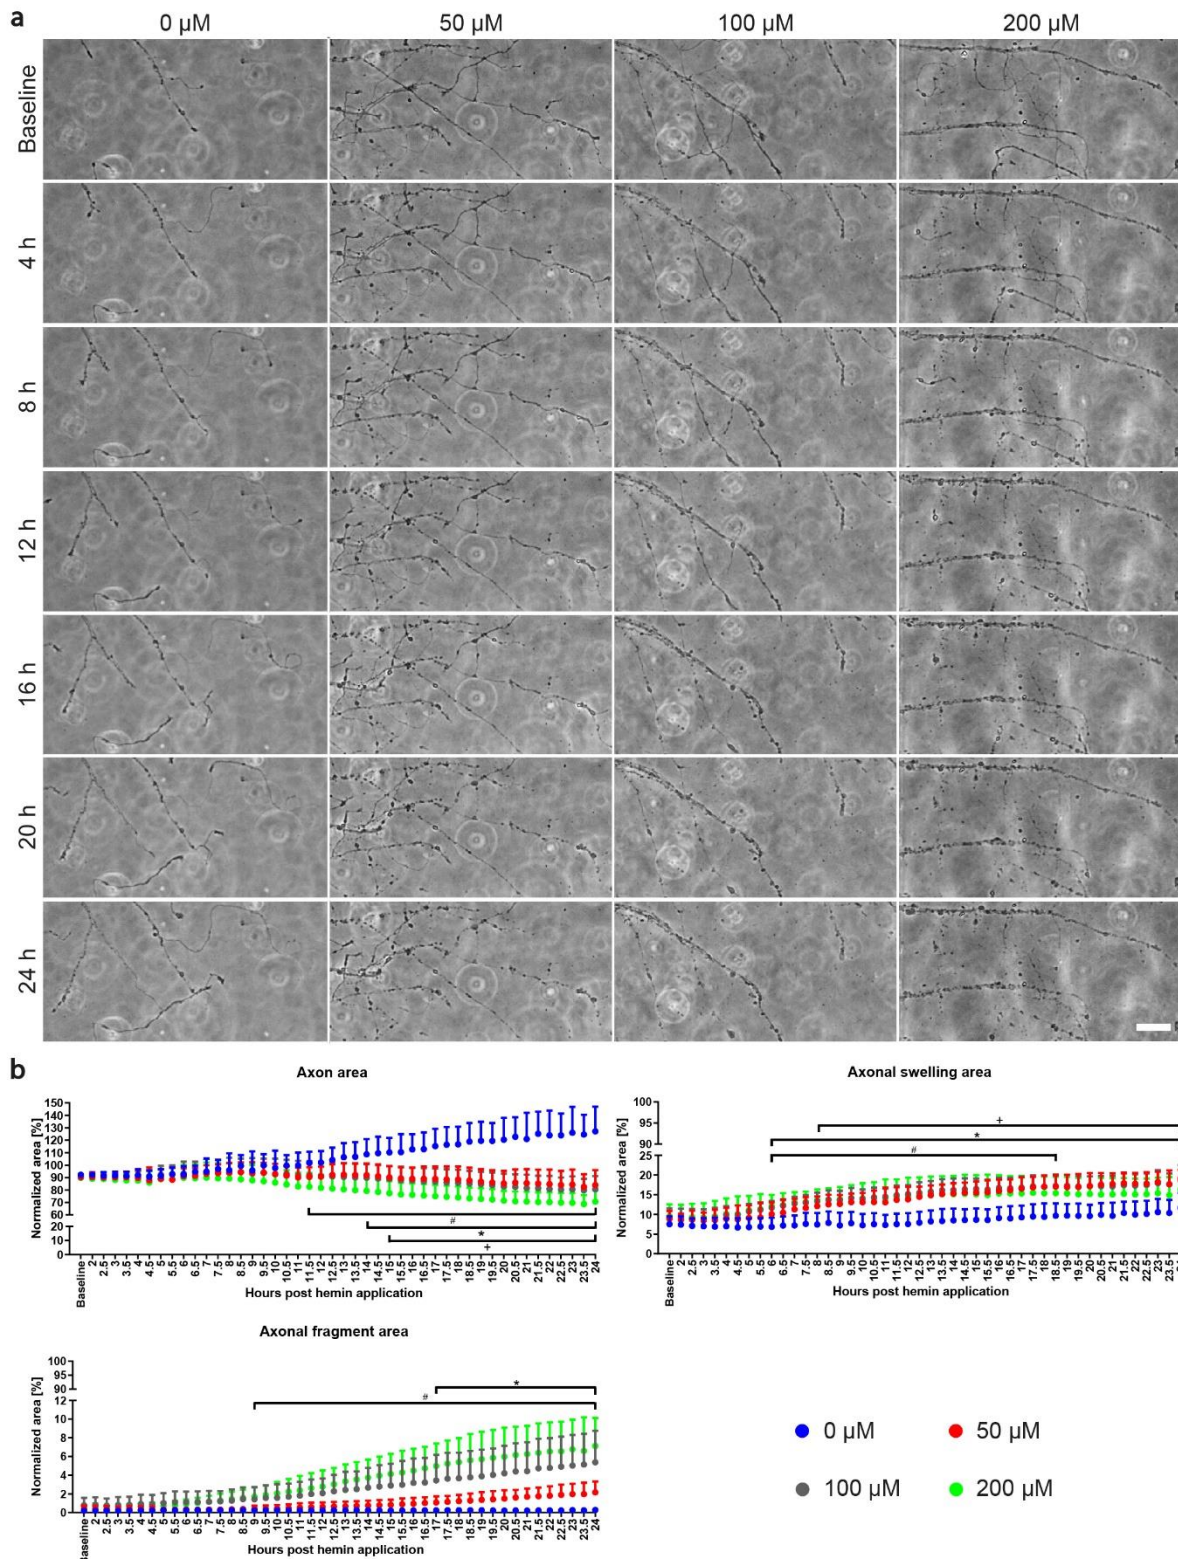

778  
779  
780  
781  
782  
783  
784  
785  
786  
787

**Fig. 4 Hemin-induced axonal degeneration (AxD) progresses time- and concentration-dependently.** **a**, Axons treated with hemin (50, 100, 200  $\mu\text{M}$ ) degenerated compared to vehicle-treated axons (0  $\mu\text{M}$ ) that continued to grow. Scalebar, 50  $\mu\text{m}$ . For complete time-lapse videos including segmentation, refer to **suppl. Videos 1-4**. **b**, Quantification of AxD over 24 hours in phase-contrast images. For AUC analyses, please refer to **suppl. Fig. 2**. To determine the time course, the sum of pixels in each class and hemin concentration over time was normalized to the baseline of that class and condition. The quantification of the phase-contrast images over 24 hours revealed significantly smaller axon areas starting at 11.5 hours (200  $\mu\text{M}$ ), 14 hours (100  $\mu\text{M}$ ), and 15 hours (50  $\mu\text{M}$ ) after hemin treatment compared to control (0  $\mu\text{M}$ ). The axonal fragment area significantly increased from 9.5 hours onwards (200  $\mu\text{M}$  vs. 0  $\mu\text{M}$ ) and from 17.5 hours (100  $\mu\text{M}$  vs. 0  $\mu\text{M}$ ), while the axonal swelling area increased from 6 hours onwards (100-200  $\mu\text{M}$ ) and from 8 hours (50  $\mu\text{M}$ ).  $n=6$  independent cultures of primary cortical

788 neurons. Means  $\pm$  SD are given. +, \*, #  $p < 0.05$ ; + = 50  $\mu$ M vs. 0  $\mu$ M, \* = 100  $\mu$ M vs. 0  $\mu$ M, # = 200  $\mu$ M vs. 0  $\mu$ M. For exact  
789  $p$  values, refer to **suppl. Tab. 1**.

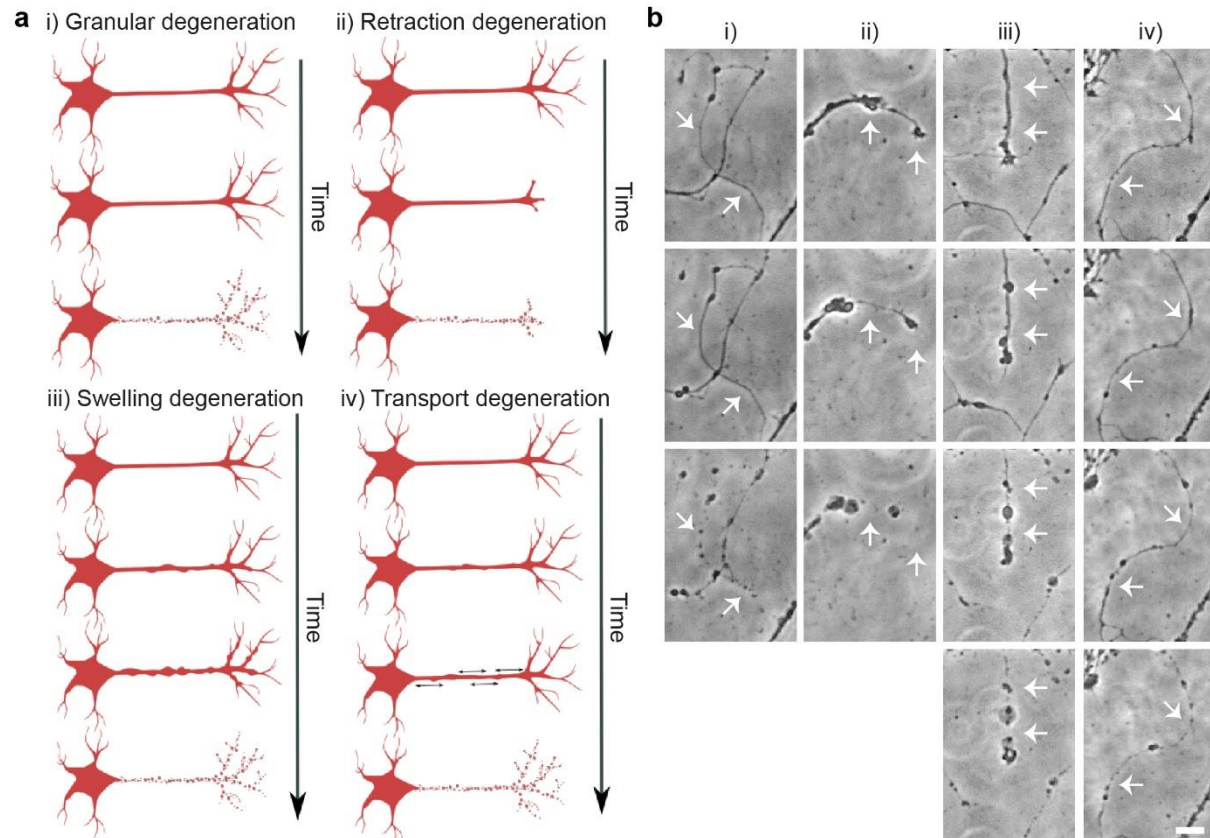

790  
791  
792  
793  
794  
795  
796  
797  
798  
799

**Fig. 5 Axonal degeneration (AxD) is a morphologically heterogeneous process.** **a**, Schematic overview of the proposed AxD morphological patterns: i) granular degeneration, ii) retraction degeneration, iii) swelling degeneration, and iv) transport degeneration. **b**, Phase-contrast recordings of the four different morphological patterns of AxD. Granular degeneration (i) is characterized by the fragmentation of the axon (white arrows). During retraction degeneration (ii), the axonal growth cone retracts in the proximal direction and the part of the axon in proximity of the growth cone disintegrates accompanied by axonal swellings (white arrows). During swelling degeneration (iii), many axonal swellings enlarge resulting in axonal fragments (white arrows). During transport degeneration (iv), axonal swellings are transported along the axon prior to the degeneration of the axon (white arrows). Scalebar, 20  $\mu\text{m}$ . For complete time-lapse videos including segmentation, refer to **suppl. Videos 5-8**.

800

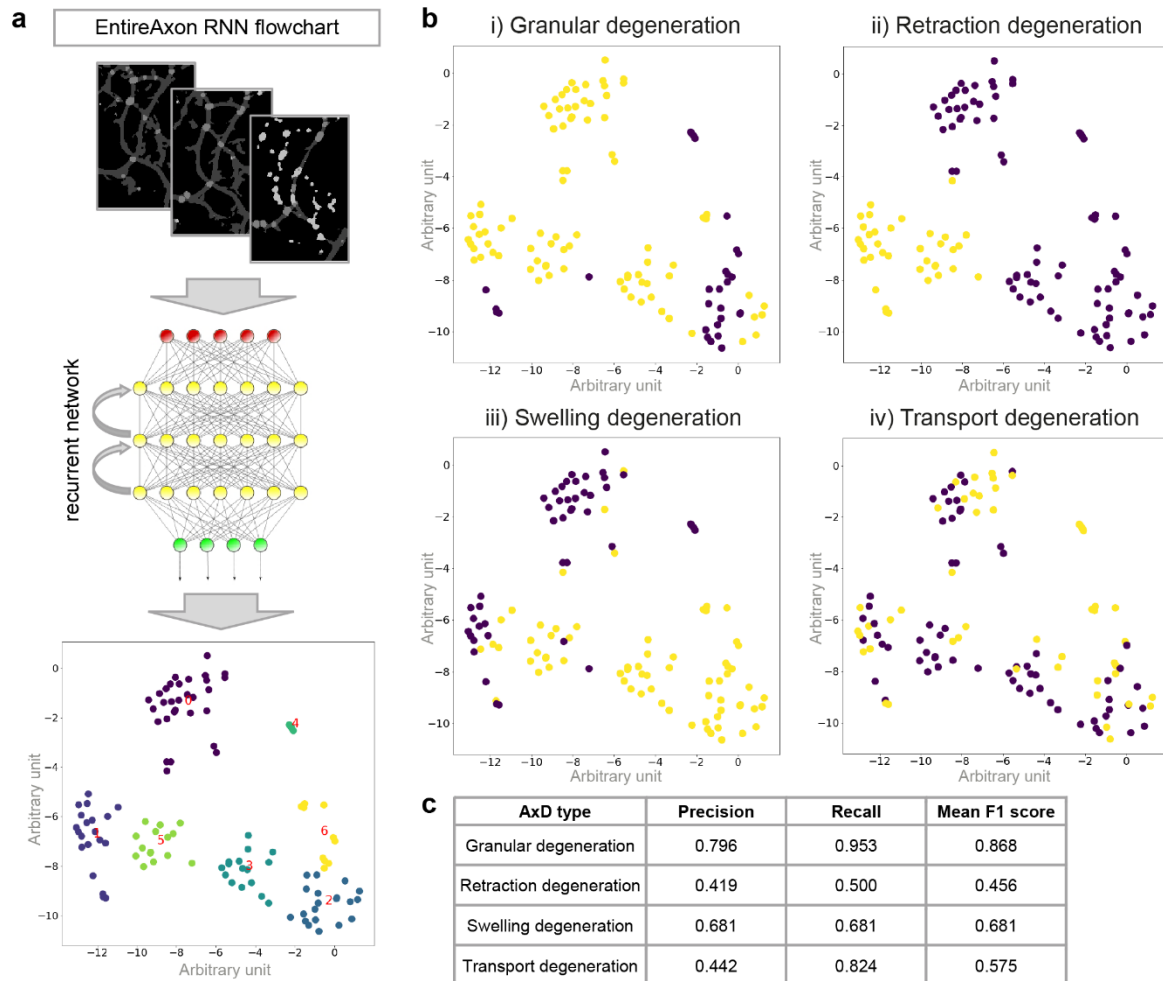

801  
 802 **Fig. 6 The EntireAxon RNN deciphers four distinct patterns of axonal degeneration (AxD).** **a**, Schematic workflow of  
 803 recurrent neural network (RNN) to recognize and quantify morphological patterns of AxD based on the identification of seven  
 804 clusters. The EntireAxon CNN segmentation masks were used for the RNN training, which determined the change in class  
 805 over time. Based on the 16 different possible class changes, the RNN determined seven clusters (cluster 0-6). **b**, The clusters  
 806 classify the four different morphological patterns of AxD with yellow indicating included and purple indicating excluded  
 807 clusters: i) granular, ii) retraction, iii) swelling, and iv) transport degeneration. Clusters of granular degeneration overlap with  
 808 recognized clusters of other morphological patterns (retraction, swelling, and transport degeneration). For more details on the  
 809 morphological changes underlying the cluster analysis, refer to **Suppl. Fig. 4**. **c**, 10-fold cross-validation of the four  
 810 morphological patterns of AxD.

811  
 812

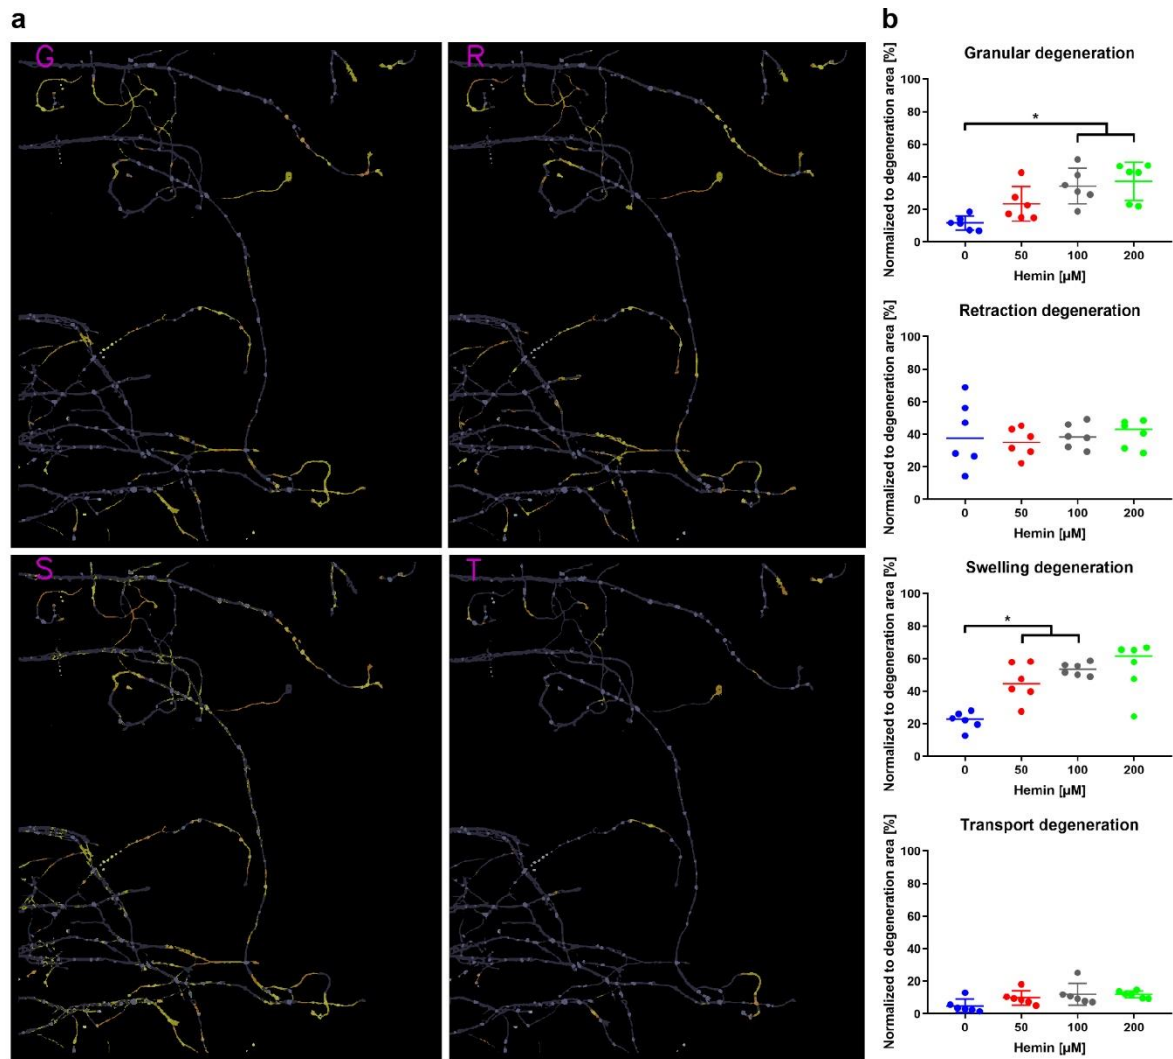

813

814 **Fig. 7 Hemin induces concentration-dependent differences in the morphological patterns of axonal degeneration (AxD).**  
815 **a.** The classification of granular (G), retraction (R), swelling (S), and transport degeneration (T) in axons treated with 200  $\mu\text{M}$   
816 hemin. Scalebar, 100  $\mu\text{m}$ . For the complete time-lapse video including segmentation, refer to **suppl. Videos 9.** **b.**  
817 Quantification of the four morphological patterns of AxD in hemin-induced AxD.  $n=6$  independent cultures of primary cortical  
818 neurons. Means  $\pm$  SD are given for granular and transport degeneration and, medians are given for retraction and swelling  
819 degeneration. \*  $p < 0.05$  vs. 0  $\mu\text{M}$  for granular degeneration, \*  $p < 0.0083$  vs. 0  $\mu\text{M}$  for swelling degeneration due to manual  
820 Bonferroni correction for nonparametric data. For exact  $p$  values, refer to **suppl. Tab. 3.**

821

822

823
