23 \* Corresponding authors:

24 Alex Palumbo

25 Postal address: Fraunhofer Research and Development Center for Marine and Cellular  
26 Biotechnology, Fraunhofer Research Institution for Individualized and Cell-Based Medical  
27 Engineering, Mönkhofer Weg 239a, 23562, Lübeck, Germany

28 Email: alex.palumbo@uni-luebeck.de

29 Phone: +49 451 3101 7227

30

31 Marietta Zille

32 Postal address: Institute for Experimental and Clinical Pharmacology and Toxicology, University  
33 of Lübeck, Ratzeburger Allee 160, 23562, Lübeck, Germany

34 Email: m.zille@uni-luebeck.de

35 Phone: +49 451 3101 7227

36

37 **ORCID**

38 Alex Palumbo ORCID: 0000-0002-1631-785X

39 Philipp Grüning ORCID: 0000-0003-2946-4020

40 Svenja Kim Landt ORCID: 0000-0002-4133-7035

41 Lara Eleen Heckmann ORCID: 0000-0003-1264-9715

42 Alessa Pabst ORCID: 0000-0003-1938-3753

43 Charlotte Flory ORCID: 0000-0001-5049-6380

44 Maulana Ikhsan ORCID: 0000-0002-8756-4524

- 45 Johannes Boltze ORCID: 0000-0003-3956-4164
- 46 Amir Madany Mamlouk ORCID: 0000-0001-9709-1620
- 47 Marietta Zille ORCID: 0000-0002-0609-8956

48 **Abstract**

49 **Background:** Axonal degeneration (AxD) is a pathological hallmark of many neurodegenerative  
50 diseases. Deciphering the morphological patterns of AxD will help to understand the underlying  
51 mechanisms and to develop effective therapeutic interventions. Here, we evaluated the progression  
52 of AxD in cortical neurons using a novel microfluidic device in combination with a deep learning  
53 tool, the EntireAxon, that we developed for the enhanced-throughput analysis of AxD on  
54 microscopic images.

55 **Results:** The EntireAxon convolutional neural network sensitively and specifically segmented the  
56 features of AxD, including axons, axonal swellings, and axonal fragments, and its performance  
57 exceeded that of human expert raters. In an *in vitro* model of AxD in hemorrhagic stroke induced  
58 by the hemolysis product hemin, we detected the concentration- and time-dependent degeneration  
59 of axons leading to a decrease in axon area, while the axonal swelling and axonal fragment area  
60 increased. Time course analysis revealed that axonal swellings preceded axon fragmentation,  
61 suggesting that swellings may be reliable predictors of AxD. Using a recurrent neural network, we  
62 further identified four morphological patterns of AxD (granular, retraction, swelling, and transport  
63 degeneration) in cortical axons subjected to hemin.

64 **Conclusions:** These findings indicate a morphological heterogeneity of AxD under  
65 pathophysiologic conditions. The combination of the microfluidic device with the EntireAxon  
66 deep learning tool enable the systematic analysis of AxD but also unravel a so far unknown  
67 intricacy in which AxD can occur in a disease context.

68

69 **Keywords:** axon, brain hemorrhage, cell culture, machine learning, microfluidic, microscopy,  
70 stroke, time-lapse

## 71 **Introduction**

72 Axonal degeneration (AxD) is a process in which axons disintegrate physiologically during  
73 nervous system development and aging, or as a pathological element of degenerative nervous  
74 system diseases (Luo and O’Leary, 2005; Lingor et al., 2012; Salvadores et al., 2017). Apart from  
75 axonal fragments, axon swellings (also called axonal beadings, bubblings or spheroids) are a  
76 hallmark of degenerating axons (Saxena and Caroni, 2007; Lingor et al., 2012; Wang et al., 2012),  
77 containing disorganized cytoskeleton and organelles resulting from an interruption of axonal  
78 transport (Coleman, 2005; Nikić et al., 2011; Yong et al., 2019).

79 It is known that axons disintegrate in different ways depending on the biological context. During  
80 development and neural circuit assembly, inappropriately grown axons can undergo axonal  
81 retraction, axonal shedding or local AxD (Pease and Segal, 2014; Neukomm and Freeman, 2014).  
82 Axonal retraction is characterized by retraction bulb formation at the distal tip, and subsequent  
83 pullback (Pease and Segal, 2014). During axonal shedding, the axon retracts leaving behind small  
84 pieces of its distal part (axosomes) (Bishop et al., 2004). Local AxD is characterized by axon  
85 disintegration into separated axonal fragments (Neukomm and Freeman, 2014). Acutely and  
86 chronically injured axons may degenerate retrogradely (distal-to-proximal direction, dying-back),  
87 anterogradely (proximal-to-distal direction) or in a Wallerian degeneration pattern (distal part of  
88 the axon from injury site), ultimately resulting in the generation of axonal fragments (Cavanagh,  
89 1979; Coleman, 2005; Beirowski et al., 2005). However, AxD patterns have been mainly described  
90 in extracerebral axons in models of nutrient deprivation or axotomy.

91 Not much is known on AxD in cortical neurons subjected to a disease-specific cytotoxic  
92 micromilieu. A distinct pathological micromilieu has recently been observed for hemorrhagic  
93 stroke, after which the lysis of erythrocytes from the hematoma leads to the release of the cytotoxic  
94 product hemin (Robinson et al., 2009; Zille et al., 2017). Patients suffering from hemorrhagic  
95 stroke often experience AxD that is associated with worse motor and functional outcome

96 (Venkatasubramanian et al., 2013; Chen et al., 2018). Importantly, AxD occurs in the subacute  
97 stages of hemorrhagic stroke. Thus, addressing AxD may not only provide a new therapeutic  
98 target, but also a much wider time window for intervention. Since not much is known about the  
99 mechanisms, morphological patterns, and the temporal progression of AxD in the context of  
100 hemorrhagic stroke, we here sought to examine the progression of AxD and its associated  
101 morphological alterations.

102 As the disintegration of the axons endures from minutes to hours (Beirowski et al., 2005;  
103 Kerschensteiner et al., 2005), it is necessary to monitor the spatiotemporal progression of AxD  
104 and its morphological hallmarks continuously. However, conventional software solutions fail to  
105 automatically detect and quantify high axon numbers as well as axonal swellings and fragments in  
106 phase-contrast microscopic images. The reason may be two-fold: 1) Conventional software relies  
107 on image binarization (Sasaki et al., 2009; Becker and Madany, 2012), which can lead to  
108 information loss and low sensitivity as thin axons may not be recognized. 2) The analysis requires  
109 subjective and time-consuming manual annotations, e.g., thresholding and defining the region of  
110 interest (Pool et al., 2008; Ho et al., 2011; Li et al., 2014). So far, immunostained images were  
111 used to investigate morphological changes in AxD as the analysis of phase-contrast images has  
112 been limited by the lower target-to-background signal. Immunofluorescence images, however,  
113 entail certain disadvantages such as photobleaching and the requirement for cell fixation, which  
114 restricts observations to a single time point. Thus, a software tool for the automatized detection  
115 and quantification of the morphological patterns of AxD in long-term live cell imaging is required  
116 to improve both sensitivity and throughput to overcome current limitations in understanding AxD.

117 In this study, we demonstrate that cortical axons underwent AxD after the exposure to the  
118 hemolysis product hemin, with axonal swellings preceding axon fragmentation. Deep learning  
119 further detected the occurrence of four AxD patterns being characterized as granular, retraction,  
120 swelling, and transport degeneration. This may inform downstream AxD and neurodegeneration

121 research in health and disease. We also provide tools for the enhanced throughput analysis of AxD,  
122 including a microfluidic device containing 16 independent experimental units and the deep  
123 learning platform “EntireAxon” to analyze AxD, which will help augment our understanding of  
124 AxD and may also support the development of novel treatment approaches for neurodegenerative  
125 diseases.

## 126 **Results**

### 127 128 **An enhanced throughput microfluidic device and the EntireAxon deep learning tool allow** 129 **the longitudinal study of axonal degeneration**

130 The major limiting factor of commercially available microfluidic devices to study AxD is that they  
131 are single, individual systems and hence, can only be used to assess one condition, which is time-  
132 consuming and precludes high-throughput analyses. To enable the systematic analysis of AxD *in*  
133 *vitro*, we 1) manufactured a microfluidic device containing 16 individual microfluidic units (**Fig. 1**  
134 **and Supplementary Fig. S1**) that can be investigated in parallel and recorded simultaneously,  
135 and 2) trained a convolutional neural network (CNN), the EntireAxon, to segment all relevant  
136 features of AxD, i.e., axons, axonal swellings, and axonal fragments (**Fig. 2**).

137 While the EntireAxon CNN recognized the class ‘background’ better than the three axon classes  
138 ‘axon’, ‘axonal swelling’, and ‘axonal fragment’ (mean F1 score: 0.995), axon-specific  
139 segmentation revealed the highest mean F1 score for the class ‘axon’ (0.780), followed by the  
140 classes ‘axonal swelling’ (0.567), and ‘axonal fragment’ (0.301) (**Fig. 3A**). Next, we compared  
141 the performance of the EntireAxon CNN on the ground truth (human expert 1) with two additional  
142 human experts. The EntireAxon CNN reached higher mean F1 scores for all classes, except for  
143 the class ‘axonal fragment’, where human expert 2 outperformed the EntireAxon CNN (**Fig. 3B**).

144 This may have been due to the fact that the EntireAxon CNN was trained on images labeled by the  
145 same human expert (1) that labeled the ground truth. To assess whether its performance is more  
146 generalizable across the different experts, we compared the EntireAxon CNN to each of the human  
147 experts on the consensus labels of the two other human experts (**Fig. 3C-D**). Visual inspection of  
148 the labels showed a wide overlap between the different experts, but also that there was considerable  
149 uncertainty, especially for the classification of axonal fragments (**Fig. 3C**). When comparing the  
150 mean F1 scores for all classes, the EntireAxon reached similar or even higher scores than the other



151 three experts (**Fig. 3D**). Collectively, this suggests that the EntireAxon CNN sensitively and  
152 specifically recognizes axons and the morphological features of AxD.

153

#### 154 **Axonal integrity is lost over time with axonal swellings preceding axon fragmentation**

155 We then applied the EntireAxon CNN to assess AxD in the context of hemorrhagic stroke. We  
156 applied the hemolysis product hemin, a commonly used agent to mimic hemorrhagic stroke *in*  
157 *vitro* (Robinson et al., 2009; Zille et al., 2017; Chen and Regan, 2004), on primary cortical axons.  
158 Accordingly, isolated axons were exposed to the hemolysis product hemin and recorded by time-  
159 lapse microscopy for 24 hours. Hemin induced concentration- and time-dependent morphological  
160 changes leading to AxD compared to vehicle-treated axons (**Fig. 4 and Videos S1-4**). Area under  
161 the curve (AUC) analyses revealed a significant decrease in axon area in all three hemin  
162 concentrations (50  $\mu\text{M}$  vs. 0  $\mu\text{M}$ :  $P = 0.026$ ; 100  $\mu\text{M}$  vs. 0  $\mu\text{M}$ :  $P = 0.018$ , 200  $\mu\text{M}$  vs. 0  $\mu\text{M}$ :  
163  $P < 0.001$ ). The axonal swelling area also increased in all three concentrations (50  $\mu\text{M}$  vs. 0  $\mu\text{M}$ :  
164  $P = 0.012$ , 100  $\mu\text{M}$  vs. 0  $\mu\text{M}$ :  $P = 0.005$ , 200  $\mu\text{M}$  vs. 0  $\mu\text{M}$ :  $P = 0.016$ ), while the axonal fragment  
165 area was elevated only for axons treated with 100 and 200  $\mu\text{M}$  hemin (vs. 0  $\mu\text{M}$ :  $P = 0.004$ , **Fig. 5**  
166 **and Table S2**).

167 Comparing the time course of AxD between hemin- and vehicle-treated axons (0  $\mu\text{M}$ ), the axon  
168 area decreased starting at 11.5 hours at 200  $\mu\text{M}$  ( $P = 0.020$ , from 15 hours  $P < 0.001$ ), at 14 hours  
169 at 100  $\mu\text{M}$  ( $P = 0.040$ , from 18.5 hours  $P < 0.001$ ), and at 15 hours at 50  $\mu\text{M}$  ( $P = 0.018$ , from  
170 19 hours  $P < 0.001$ ). Hemin treatment also elevated the axonal fragment area starting at 9 hours at  
171 200  $\mu\text{M}$  ( $P = 0.037$ ) and at 17 hours at 100  $\mu\text{M}$  hemin ( $P = 0.044$ ). Interestingly, the axonal  
172 swelling area increased prior to the changes in axon and axonal fragment area, i.e., starting at  
173 6 hours at 200  $\mu\text{M}$  ( $P = 0.010$ ) and 100  $\mu\text{M}$  ( $P = 0.019$ ), and at 8 hours at 50  $\mu\text{M}$  hemin  
174 ( $P = 0.030$ ). For the highest hemin concentration, the increase was only transient (until

175 18.5 hours), suggesting that axonal swellings preceded the axon fragmentation (**Table S1**), which  
176 can also be seen in the time-lapse recordings (**Videos S2-4**).

177 The results of the time course analysis were further substantiated by live cell fluorescent staining  
178 (calcein AM), which indicated the starting point of AxD after hemin treatment between 8 and  
179 12 hours for 200  $\mu\text{M}$  hemin, between 12 and 16 hours for 100  $\mu\text{M}$  hemin and 16 and 20 hours for  
180 50  $\mu\text{M}$  hemin (**Supplementary Fig. S2**). Taken together, AxD progression depends on the severity  
181 of the insult and axonal swellings may be reliable predictors of AxD.

182

### 183 **Deep learning deciphers four patterns of AxD**

184 AxD time-lapse data revealed different morphological patterns of degeneration that can occur in  
185 the same axons over time (**Fig. 6** and **Videos S5-8**). We categorized these morphological patterns  
186 as:

- 187 i) Granular degeneration: AxD resulting in granular separated fragments.
- 188 ii) Retraction degeneration: AxD in which the distal part of the axon retracts ultimately  
189 resulting in granular degeneration.
- 190 iii) Swelling degeneration: AxD in which axonal swellings enlarge, followed by granular  
191 degeneration.
- 192 iv) Transport degeneration: AxD in which axonal swellings of constant size, which do not  
193 enlarge, are transported along the axon resulting in granular degeneration.

194 We trained a recurrent neural network (RNN), the EntireAxon RNN, to identify these  
195 morphological patterns based on changes in class segregation over time using a training dataset of  
196 AxD segmentation recordings (**Fig. 7A**). Given the four different classes (background, axon,  
197 axonal swelling, and axonal fragment), 16 different class pairs can occur between a segmentation  
198 at time step  $t$  and time step  $t+1$ . For example, a background pixel at  $t$  can either remain background

199 pixel at  $t+1$  or change into one of the other three classes, and the same is true for the other classes.  
200 Thus, in total, four times four class pairs are possible. We used a window size of 32x32, of which  
201 always the probability of a class pair in the central pixel relative to the previous time point was  
202 computed for each time point and across the entire image.

203 The RNN determined seven clusters (cluster 0-6) that were characterized by an idiosyncratic  
204 pattern of changes in class distribution over 24 hours (**Supplementary Fig. S3**). All clusters  
205 showed a decrease in the class ‘axon’ and an increase in the class ‘background’. Depending on the  
206 hemin concentration, the changes occurred at a different magnitude and at different time points,  
207 and with concomitant increases in either the class ‘axonal swelling’ and/or ‘axonal fragment’. In  
208 cluster 0, there was an early decrease in the class ‘axon’, which then continued more linearly as  
209 well as a later rise in the class ‘axonal fragment’. In contrast to cluster 0, cluster 1 showed no  
210 increase in the class ‘axonal fragment’ and a linear decrease in the class ‘axon’ from the start. In  
211 cluster 2, there was a strong increase in the class ‘axonal swelling’. Cluster 3 demonstrated an  
212 early and lasting high level of the class ‘axonal swelling’ with a later increase in the class ‘axonal  
213 fragment’. Cluster 4 showed a rapid decrease in the class ‘axon’ concomitant with an increase in  
214 the classes ‘background’ and ‘axonal swelling’. Cluster 5 was similar to cluster 1, but with an early  
215 drop in the class ‘axon’. Cluster 6 showed an increase in the class ‘axonal swelling’ similar to but  
216 to a greater extent than cluster 2.

217 The RNN categorized each cluster to one of the four morphological patterns (**Fig. 7B**): i) Granular  
218 degeneration was defined by clusters that describe the degeneration of axons into axonal  
219 fragments, i.e. clusters 0, 1, 3, and 5. ii) Retraction degeneration only included the clusters 1 and  
220 5, indicating the retraction of the axon followed by its fragmentation. iii) Swelling degeneration  
221 was characterized by the three clusters that included the class ‘axonal swelling, i.e., clusters 2, 3,  
222 and 6, as well as cluster 5 showing the exchange of the class ‘axon’ for ‘background’. iv) Transport  
223 degeneration was the only pattern that relied on cluster 4 and was also characterized partly on

224 clusters 0, 1, 2, and 6. Although some clusters overlap among morphological patterns, the unique  
225 combination of the different clusters allows to distinguish all four morphological patterns.

226 To validate the EntireAxon RNN, a 10-fold cross-validation was performed. Therefore, the dataset  
227 was randomly divided into 10 datasets and ten models were trained with 9 of the datasets leaving  
228 the remaining dataset for validation (not previously seen by the RNN). Based on the combined test  
229 samples, the RNN was able to distinguish between the four morphological patterns of AxD  
230 (**Fig. 7C**). These data confirm that the combination of the different AxD features as well as their  
231 spatiotemporal progression defines distinct morphological AxD patterns.

232

### 233 **The morphological patterns of AxD depend on the extent of AxD**

234 We then applied the EntireAxon RNN to quantify the occurrence of the four morphological  
235 patterns of AxD in the context of hemorrhagic stroke (**Fig. 8 and Video S9**). While all AxD  
236 patterns were detected (**Fig. 8A**), hemin concentration-dependently increased granular  
237 degeneration ( $P < 0.001$ ), swelling degeneration ( $P < 0.001$ ), and transport degeneration  
238 ( $P = 0.025$ , **Fig. 8B**). When comparing the slopes of the different AxD patterns under hemin  
239 exposure, granular and swelling degeneration were significantly different from transport  
240 degeneration ( $P = 0.005$  and  $P = 0.004$ , respectively, **Table S3**). Collectively, our data suggest that  
241 hemin concentration-dependently induces different morphological patterns of AxD in cortical  
242 axons.

## 243 **Discussion**

244 We here describe the occurrence of four morphological patterns of AxD under pathophysiological  
245 conditions: granular, retraction, swelling, and transport degeneration. These rely on time- and  
246 concentration-dependent changes of the morphological features of AxD, with axonal swellings  
247 preceding axon fragmentation. The herein introduced complementary tools, a novel microfluidic  
248 device and the EntireAxon, allow increasing the experimental yield, the in-depth enhanced  
249 throughput analysis of AxD as well as the longitudinal investigation of AxD.

250 We propose a novel monolithic microfluidic device consisting of 16 individual microfluidic units  
251 that enables the parallel and separated treatment and/or manipulation of axons and somata (**Fig. 1**).  
252 The currently available devices do not allow enhanced throughput experiments as they comprise  
253 only single microfluidic units (Park et al., 2006; Van Laar et al., 2019). Although some devices  
254 can harbor multiple experimental conditions, they employ a radial design with a single soma  
255 compartment, in which one experimental condition may influence another due to the potential of  
256 retrograde signaling (Hosmane et al., 2010; Biffi, 2015). Another option is the parallel use of  
257 multiple individual devices, which allows handling up to 12 devices in a conventional 12-well  
258 plate (Li et al., 2014). Compared to our device, this procedure is time-consuming in both the  
259 manufacturing and adjustment for recordings.

260 The extent of AxD has so far been mainly investigated with a focus on axon fragmentation as  
261 primary readout. To quantify axon fragmentation, Sasaki and colleagues introduced the AxD index  
262 as the ratio of fragmented axon area versus total axonal area (Sasaki et al., 2009). However, the  
263 AxD index did not include axonal swellings, which are a characteristic feature of degenerating  
264 axons (Yong et al., 2019; Cui et al., 2020). Although other analyses considered axonal swellings  
265 as a morphological feature of AxD (Nikić et al., 2011; Yong et al., 2019), the approaches were  
266 time-consuming and required manual annotations.

267 We herein adapted a standard u-net with ResNet-50 encoder (Ronneberger et al., 2015; He et al.,  
268 2015) and used a CNN ensemble, which combines predictions from multiple CNNs to generate a  
269 final output and is superior to individual CNNs (Dietterich, 2000; Huang et al., 2016; Vuola et al.,  
270 2019). The EntireAxon CNN performs an automatic segmentation and quantification of axons and  
271 morphological features relevant to AxD, including axonal swellings and fragments, on phase-  
272 contrast time-lapse microscopy images (**Fig. 2**). The EntireAxon CNN recognized the four classes  
273 ‘background’, ‘axon’, ‘axonal swelling’, and ‘axonal fragment’, with the highest mean F1 score  
274 for the class ‘background’ (**Fig. 3A**). The comparably lower performance of the CNN to recognize  
275 axonal fragments may be explained by the disproportional distribution of pixels in the training and  
276 validation data (‘background’ mean of 96.42 % of pixels, ‘axon’ 2.77%, ‘axonal swelling’ 0.58%,  
277 ‘axonal fragment’ 0.23 %). Hence, every individual segmentation error more strongly affects the  
278 false positive or false negative rate in these classes.

279 Comparison with human experts revealed that the EntireAxon CNN reached a similar performance  
280 level. As expected, its performance was slightly better than the human experts on the ground truth  
281 as both, ground truth and training data, were labeled by the same human expert (**Fig. 3B**).  
282 Interestingly, when comparing the EntireAxon CNN with a human expert on the consensus label  
283 of the other two human experts, not only was the EntireAxon CNN as good as or even better than  
284 the human expert, but the mean F1 scores were also higher than on the ground truth labels  
285 (**Fig. 3D**). This may be because pixels that were differentially assigned by the human expert, i.e.  
286 more difficult to classify, were excluded from the comparison. Taken together, these findings  
287 demonstrate that the EntireAxon CNN is suitable to automatically quantify AxD and its  
288 accompanying morphological changes in an enhanced throughput manner.

289 Conventional *in vitro* models of AxD rely mainly on nutrient deprivation or axotomy and focus on  
290 axons outside the brain. However, AxD is not only an active and commonly observed process in  
291 the brain, but it is also believed to be caused by more complex mechanisms given the different

292 microenvironments in which it may occur. For example, AxD has been demonstrated to occur in  
293 intracerebral hemorrhage (Venkatasubramanian et al., 2013; Tao et al., 2017). In this context,  
294 cortical axons are exposed to a cytotoxic microenvironment due to hemolysis leading to the release  
295 of blood breakdown products, whose effects on axons remain to be elucidated (Hemorrhagic  
296 Stroke Academia Industry (HEADS) Roundtable Participants, 2018). We therefore modeled  
297 hemorrhagic stroke by exposing axons from primary cortical neurons to the hemolysis product  
298 hemin and investigated the progression of AxD. Similar to previous results where 100  $\mu$ M hemin  
299 were sufficient to induce significant neuronal cell death in conventional cultures of somata and  
300 axons (Zille et al., 2017), we here observed that 100  $\mu$ M hemin led to a significant decrease in  
301 axon area and an increase in axonal swelling and fragment area (**Fig. 4**).

302 The progression of AxD undergoes a latent phase, during which the structural integrity of the axon  
303 is maintained, followed by a catastrophic phase with the rapid disintegration of the axon (Yong et  
304 al., 2019). In our model, the catastrophic phase of AxD started within 12 to 18 hours after the  
305 administration of hemin (**Fig. 4 and Supplementary Fig. S2**). Similar durations of the latent  
306 phases of AxD have been observed in other models. For instance, under circumstances of growth  
307 factor withdrawal, the transition to the catastrophic phase occurred at 12-24 hours (Nikolaev et al.,  
308 2009; Maor-Nof et al., 2016; Yong et al., 2019).

309 We further demonstrated that the relative axon area decreased at higher hemin concentrations,  
310 while the axonal fragment area increased. Our results are in accordance with other experimental  
311 conditions such as axotomy-mediated or paclitaxel-induced AxD, in which axonal fragments also  
312 increased (Sasaki et al., 2009; Pease-Raissi et al., 2017). As the axonal swelling area preceded the  
313 increase of axonal fragments and axon area loss, our findings are also in line with results reported  
314 in a model of experimental autoimmune encephalomyelitis indicating that axonal swelling  
315 anticipates fragmentation (Nikić et al., 2011). This suggests that axonal swelling may be a reliable  
316 predictor of AxD.

317 Interestingly, axonal swellings and axonal fragments were related to different morphological  
318 patterns of AxD. Specifically, we observed axons that showed signs of axonal retraction, enlarging  
319 of axonal swellings and axonal transport before degeneration (**Fig. 6**). We therefore trained the  
320 EntireAxon RNN to quantify the occurrence of four morphological patterns of AxD, i.e. granular,  
321 retraction, swelling, and transport degeneration, based on the clusters of unique changes of classes  
322 over time (**Fig. 7 and Supplementary Fig. S3**). These patterns have not been described to occur  
323 simultaneously in the same biological condition: Granular degeneration has previously been  
324 observed in retrograde, anterograde, Wallerian and local AxD after axotomy or trophic factor  
325 deprivation (Cavanagh, 1979; Coleman, 2005; Beirowski et al., 2005; Neukomm and Freeman,  
326 2014). Retraction degeneration has been described in axonal retraction and shedding in  
327 developmental AxD (Bishop et al., 2004; Pease and Segal, 2014). Swelling degeneration was  
328 previously reported in experimental autoimmune encephalitis and growth factor deprivation (Nikić  
329 et al., 2011; Yong et al., 2019). Transport degeneration has not been reported before. However,  
330 microtubule breaks have been demonstrated in a model of axonal stretch injury. Those developed  
331 into axonal swellings resulting in axonal transport interruption with AxD as a consequence (Tang-  
332 Schomer et al., 2012).

333 Our data demonstrate that all four morphological degeneration patterns can occur along cortical  
334 axons (**Fig. 8**). Interestingly, we also observed a concentration-dependent effect in the context of  
335 hemorrhagic stroke. Granular, swelling, and transport degeneration were significantly increased  
336 with increasing hemin concentrations, with granular and swelling degeneration being more  
337 strongly correlated. To what extent our model of hemin-induced AxD in hemorrhagic stroke is  
338 molecularly similar to developmental or pathophysiological AxD needs to be further investigated  
339 along with the underlying molecular mechanisms of the four patterns of AxD. This could be greatly  
340 facilitated by the EntireAxon RNN that is able to automatically detect the morphological patterns



341 in time-lapse recording due to its capacity to relate each output to previous images in the stacks by  
342 its current units.

343

### 344 **Limitations and outlook**

345 i) Our microfluidic device currently does not allow to investigate AxD at more proximal axonal  
346 parts to the soma such as the axonal initial segment. Shortening the length of the microgrooves or  
347 including a more proximal compartment, are possible modifications of the current design.

348 ii) Our results are based on unmyelinated axons. Co-culture with glia cells that may play a role in  
349 AxD is possible in the presented microfluidic device and the time course and morphological  
350 changes may be different under co-culture conditions. These studies are of high relevance to the  
351 field, but go beyond the scope of the present study.

352 iii) The observed effects of AxD in hemorrhagic stroke within this study were based on hemin  
353 toxicity, and we cannot exclude that other hemolysis products such as thrombin or bilirubin have  
354 different effects. Additional studies should investigate differences of hemolysis products to  
355 increase our understanding of the mechanisms of AxD in hemorrhagic stroke.

356 iv) The overall CNN performance may be further improved with more general inputs. For example,  
357 the segmentation of fragment pixels cannot be conducted accurately based on a single image at a  
358 specific time point as the whole process of AxD, ultimately resulting in the disintegration of the  
359 axons (i.e., the generation of axonal fragments), needs to be considered. CNNs using 3D  
360 convolutions could, in principle, perform a segmentation over an entire time-lapse recording and  
361 model temporal dependencies. However, we decided against the 3D approach, as it severely  
362 restricts general applicability due to its greatly increased effort to label suitable time series for  
363 training. In this context, the identification of the images that will yield the best results is crucial to

364 effectively reduce labeling costs, which we have previously described using an active learning  
365 method (Grüning, P. et al., 2020).

366

## 367 **Conclusion**

368 In combination with an advanced microfluidic device, the EntireAxon deep learning tool expands  
369 our possibilities to track AxD by detecting axons, axonal swellings, and axonal fragments. We  
370 further identified four morphological patterns of AxD, i.e., granular, retraction, swelling, and  
371 transport degeneration, under pathophysiological conditions in the context of hemorrhagic stroke.  
372 This approach will help to tackle the complex processes of AxD and may significantly enhance  
373 our understanding of AxD in health and disease to develop novel therapeutic strategies for brain  
374 diseases.

375

## 376 **Methods**

377 Chemicals and reagents are listed in **Tables S4-5**.

378

### 379 **Study design**

380 *Sample size:* Six mice. We did not perform a priori power analysis as this was an exploratory  
381 study. We did not change the number of the mice during the course of the study.

382 *Data inclusion/exclusion criteria:* Recordings that did not have any technical flaws, such as  
383 shifting of the microfluidic device in x, y, or z-axis were included. Recordings with minor x and  
384 y-axis shifts that we were able to correct by post-recording alignment (see **Image preprocessing**)  
385 were included. All data were processed using the same settings. The training and validation images  
386 for the deep learning tool were chosen to represent the testing data as best as possible.

387 *Outliers:* No outliers have been excluded in the study.

388 *Selection of endpoints:* Endpoints were the area of the axons, axonal swellings, and axonal  
389 fragments, respectively.

390 *Replicates:* Each individual mouse counted as a biological replicate (N = 6 biological replicate per  
391 experiment). Four different microfluidic units have been used for four experimental conditions (0,  
392 50, 100, 200  $\mu$ M hemin) per biological replicate.

393 *Research objectives:* The research objective was to examine the progression of axonal  
394 degeneration in primary cortical neurons upon hemin exposure. Therefore, a microfluidic device  
395 and deep learning tool to increase the experimental yield and to enable unbiased automatic analysis  
396 was developed. Our pre-specified hypothesis was to detect a concentration-dependent effect of  
397 hemin on axons. Our suggested hypothesis after conducting time-lapse recording was that there  
398 are four morphological patterns of axonal degeneration and that those depend on the severity of  
399 axonal degeneration by different hemin concentrations.

400 *Research subjects or units of investigation:* We employed primary cortical neurons from Crl:CD1  
401 (ICR) Swiss outbred mice.

402 *Experimental design:* Randomized controlled laboratory experiment with four different  
403 concentrations of hemin treatment to induce and record axonal degeneration by time-lapse  
404 microscopy and further validation by fluorescence microscopy.

405 *Randomization:* Microfluidic units have randomly been assigned to one of the four experimental  
406 conditions (0, 50, 100, 200  $\mu$ M hemin).

407 *Blinding:* The experimenter was not blinded when axons were treated with different hemin  
408 concentrations. The actual analysis was objective as being conducted solely by the deep learning  
409 tool.

410

## 411 **Fabrication of an enhanced throughput microfluidic device based on soft lithographic** 412 **replica molding**

413 Thirty-two wells were milled in a polymethyl methacrylate (PMMA) plate of the size of a  
414 conventional cell culture plate (**Fig. 1A and Supplementary Fig. S1**) using a universal milling  
415 machine (Mikron WF21C, Mikron Holding AG) with a 1 mm triple tooth cutter (HSS-CO8 Type  
416 N, Horex) at a precision of 0.01 mm. During the milling procedure, we applied a half-synthetic  
417 cooling lubricant (Opta Cool 600 HS, Wisura GmbH) on a mineral base to reduce the debris.  
418 Additionally, we milled screw holes in the intermediate spaces between each microfluidic unit to  
419 later detach the PMMA from the negative casting mold. To remove debris, we washed the PMMA  
420 plate by sonication (Sonicator Elmasonic S, Elma Schmidbauer GmbH) at room temperature for  
421 30 minutes. Next, we lasered the microgrooves on the PMMA plate to connect both milled  
422 compartments of each individual microfluidic unit by using an Excimerlaser (Excistar XS 193 nm,

423 Coherent). The PMMA plate was then washed again by sonication at room temperature for  
424 30 minutes.

425 Polydimethylsiloxane (PDMS) was prepared in a 1:10 ratio and mixed properly before inducing  
426 vacuum at 0.5 Torr in a vacuum desiccator (Jeio Tech VDC-31) for 30 minutes. After the PDMS  
427 was poured into an empty aluminum basin to cover the ground, we applied vacuum at 0.5 Torr for  
428 30 minutes to remove air bubbles. The PDMS was cured at room temperature for 48 hours. We  
429 put the PMMA plate on top of the PDMS ground with the milled and lasered structures showing  
430 upwards. Half of each well of the microfluidic units was filled with PDMS before curing at room  
431 temperature for 48 hours. We mixed the epoxy solution in a 1:1 ratio and poured it over the  
432 microfluidic device to cover its surface by at least 1 cm. Vacuum was applied at 0.5 Torr for  
433 10 minutes to remove all air bubbles located above the channel side of the microfluidic device.  
434 The epoxy was cured at room temperature for a minimum of 2 hours. We subsequently detached  
435 the epoxy from the PMMA plate via a metallic block that consisted of screw holes in the  
436 intermediate spaces between the individual systems. The epoxy represented a negative casting  
437 mold to produce the microfluidic devices using PDMS.

438 PDMS was prepared as described above. We poured the PDMS into the negative epoxy casting  
439 mold and applied vacuum at 0.5 Torr for 30 minutes. The liquid PDMS was cured at 75 °C for  
440 2 hours to induce the polymerization. We peeled the microfluidic devices from the casting mold  
441 and punched the wells with an 8 mm biopsy punch (DocCheck Shop GmbH) to ensure a sufficient  
442 amount of medium for cell culture. We cleaned customized 115 x 78 x 1 mm glass slides by  
443 sonication (Sonicator Elmasonic S, Elma Schmidbauer GmbH) and subsequently cleaned them by  
444 ethanol before plasma treatment (High Power Expanded Plasma Cleaner, Harrick Plasma). Plasma  
445 was applied at 45 W and 0.5 Torr for 2 minutes to activate the silanol groups of the glass slides  
446 and the microfluidic devices enabling firm attachment.

447 We washed the microfluidic devices with ethanol and then twice with distilled water to remove  
448 any debris. After aspirating the distilled water, except from the inside of the compartments,  
449 0.1 mg/mL of poly-d-lysine solution in 0.02 M borate buffer (0.25 % (w/v) borate acid, 0.38 %  
450 (w/v) sodium tetraborate in distilled water, pH 8.5) was used for coating at 4 °C overnight. We  
451 aspirated the poly-d-lysine the next morning, not removing it from the compartments, and added  
452 50 µg/mL of laminin as a second coating surface for incubation at 4 °C overnight. At the day of  
453 neuron isolation, the microfluidic devices were washed twice with pre-warmed medium after  
454 aspirating the laminin. Immediately prior to cell seeding, we aspirated the medium from the wells  
455 without removing it from the compartments.

456

#### 457 **Experimental animals**

458 Crl:CD1 (ICR) Swiss outbred mice (Charles River) were used. The animals were kept at 20-22 °C,  
459 30-70 % humidity in a 12-hour/12-hour light/dark cycle and were fed a standard chow diet  
460 (Altromin Spezialfutter GmbH) *ad libitum*. Animal experiments followed the protocol of the “NIH  
461 Guide for the care and use of laboratory animals” and were approved by the Schleswig-Holstein  
462 Ministry for Energy Transition, Agriculture, Environment, Nature and Digitalization (under the  
463 prospective contingent animal license number 2017-07-06 Zille).

464

#### 465 **Isolation and culture of primary cortical neurons**

466 We isolated primary cortical neurons from murine E14 embryos after decapitation as previously  
467 described (Zille et al., 2017). We seeded the neurons at a density of 10,000 cells/mm<sup>2</sup> in 5 µL  
468 MEM+Glutamax medium into one compartment (soma compartment) of each microfluidic unit of  
469 the device. The cells were allowed to adhere at 37 °C for 30 minutes. In order to promote  
470 directional axon growth into the other compartment (axonal compartment) by medium microflux,

471 150  $\mu$ L of MEM+Glutamax medium were applied to the well of the soma compartment, while  
472 100  $\mu$ L were added to the well of the axonal compartment (**Fig. 1B**). Neurons were cultured at  
473 37 °C in a humidified 5 % CO<sub>2</sub> atmosphere. The next day, we changed from MEM+Glutamax  
474 medium to Neurobasal Plus Medium containing 2 % B-27 Plus Supplement, 1 mM sodium  
475 pyruvate and 1 % penicillin/streptomycin. The volume differences among the wells ensured the  
476 microflux for the directional axonal growth over the following days.

477

## 478 **Immunofluorescence**

479 Soma and axonal compartments in the microfluidic units were fixed at room temperature for 1 hour  
480 in 4 % formaldehyde solution in phosphate buffered saline (PBS). They were washed twice with  
481 PBS and permeabilized with blocking solution (2 % BSA, 0.5% Triton-X-100 and 1x PBS) at  
482 room temperature for 1 hour. We incubated the neurons/axons on both compartments with primary  
483 antibodies against synaptophysin (1:250) and MAP2 (1:4000) at 4 °C overnight. The next day,  
484 both compartments were washed three times with PBS and incubated with the secondary  
485 antibodies anti-mouse Alexa Fluor 546 (1:500) and anti-rabbit Alexa Fluor 488 (1:500) at room  
486 temperature for 1 hour. After washing three times with PBS, both compartments were incubated  
487 with DAPI (1  $\mu$ g/mL) for nuclear counterstaining at room temperature for 10 minutes. Both  
488 compartments were washed three times with PBS prior to fluorescence microscopy. An Olympus  
489 IX81 time-lapse microscope (Olympus Deutschland GmbH) with a 10X objective (0.3 NA Ph1)  
490 and camera F-View soft Imaging system was used at room temperature. Images were acquired  
491 with Cell<sup>M</sup> software (Olympus Deutschland GmbH) and further processed via ImageJ (see **Image**  
492 **preprocessing**).

493

## 494 **Selection of microfluidic units for hemin treatment and time-lapse recording**

495 At six or seven days in culture, microfluidic devices were considered for recording if they met the  
496 following inclusion criteria: i) axon growth through at least 80 % of all microgrooves and ii) axon  
497 length of at least 150  $\mu\text{m}$  from the end of the microgrooves. All included microfluidic units were  
498 randomly assigned to the experimental conditions.

499

### 500 **Time-lapse recording of axonal degeneration**

501 Axons were treated with 0 (vehicle), 50, 100, and 200  $\mu\text{M}$  hemin. For the treatment, the medium  
502 was removed from the wells of the microfluidic units; hemin was diluted in the collected media  
503 and added back to the respective wells. The media volume between the two wells was equalized  
504 during the treatment to prevent any microflux. All microfluidic units were recorded immediately  
505 after each other. We started the recordings at 1 hour after treatment to allow for the adjustment of  
506 the well plates to the humidity of the incubation chamber of the microscope and the setup of the  
507 recording positions. We recorded AxD in Neurobasal Plus Medium containing 2 % B-27 Plus  
508 Supplement, 1 mM sodium pyruvate and 1 % penicillin/streptomycin with a 30-minutes interval  
509 for 24 hours using an Olympus IX81 time-lapse microscope (see **Immunofluorescence**) at 37 °C,  
510 5 %  $\text{CO}_2$  and 65 % humidity.

511

### 512 **Live cell fluorescent staining**

513 To evaluate axonal vitality, we washed the axonal compartment once with PBS and incubated the  
514 axonal compartment with calcein AM (4  $\mu\text{M}$ ) in PBS for 30 minutes at 37 °C at the end of the  
515 time-lapse recording or in 4-hour intervals upon hemin treatment. An Olympus IX81 time-lapse  
516 microscope (see **Immunofluorescence**) was used to record the respective images at 37 °C, 5 %  
517  $\text{CO}_2$  and 65 % humidity.

518



519 **Training of the EntireAxon CNN for the segmentation of phase-contrast microscopic images**

520 We trained the EntireAxon CNN for the image-wise semantic segmentation of AxD features in a  
521 supervised manner (**Fig. 2B**). To this end, we adapted a standard u-net with ResNet-50 encoder  
522 (Ronneberger et al., 2015) to automatically determine the class probability for each pixel of an  
523 input image. Our segmentation aimed to classify each pixel of a microscopic image of a time-lapse  
524 recording into one of four classes: ‘background’, ‘axon’, ‘axonal swelling’, and ‘axonal fragment’.  
525 For the training dataset, we selected 33 images and created corresponding image labels (masks)  
526 using GIMP (v.2.10.14, RRID:SCR\_003182). For each image, a label image with the same height  
527 and width was created, in which each pixel value denotes a pixel class. Specifically, the classes  
528 ‘background’, ‘axon’, ‘axonal swelling’, and ‘axonal fragment’ had the values 0, 1, 2, and 3,  
529 respectively. For each pixel of the input image, we retained 4 values that reflect the probability  
530 distribution of the pixel over the four classes. We assigned each pixel the most probable class to  
531 create a segmentation map. During training, the CNN observed an input image, produced an output  
532 and compared this output to the label. The weights of the network were adapted via  
533 backpropagation so that the output better fitted the label. The weight changes were derived from a  
534 pixelwise loss function, i.e. the cross-entropy loss:

535 
$$Loss(P, Y) = -\sum_{x,y,c} Y(x, y, c) \log(P(x, y, c));$$

536 with  $P(x, y, c)$  and  $Y(x, y, c)$  being the probability of class  $c$  at pixel  $(x, y)$  for the prediction and  
537 ground truth of the network, respectively.

538  
539 We trained a mean ensemble consisting of eight neural networks for 180 epochs using the Adam  
540 optimizer, a batch size of four and a learning rate of 0.001 that decreased by a factor of ten after  
541 every 60 epochs. The input images were standardized by the image-net mean and standard

542 deviation (Deng et al., 2009). For data augmentation, we used random cropping (size 512 x 512),  
543 image flipping along the horizontal axis and rotation by a random angle between -90° and +90°.

544

### 545 **Validation of the EntireAxon CNN compared to human experts**

546 To measure how well the EntireAxon CNN segments unknown images (**Fig. 2C**), we used a second  
547 validation set comprising eight images that were labeled by three human experts (A. Palumbo,  
548 S.K.L., L.E.H.). Importantly, the EntireAxon CNN did not update its parameters during training  
549 to fit the validation set, but only used the training set.

550 For each image, the EntireAxon CNN inferred a segmentation. We generated a binary mask from  
551 the prediction of the network, where 1 denotes the respective class and 0 all other classes. We  
552 computed a binary label mask in the same manner. We counted the true positive (TP), false positive  
553 (FP), and false negative (FN) pixels and computed the recall (sensitivity) and precision (Forman  
554 and Scholz, 2010):

$$555 \quad \text{Recall} = \frac{TP}{TP + FN}$$

$$556 \quad \text{Precision} = \frac{TP}{TP + FP}$$

557 Recall and precision were calculated for each class separately on each validation image. The mean  
558 recall and precision over all eight validation images were determined subsequently.

559 A mean of 96.42 % of pixels in the axonal images were ‘background’ pixels, while only 2.77 %  
560 represented the class ‘axon’, 0.58 % ‘axonal swelling’, and 0.23 % ‘axonal fragment’ pixels. This  
561 reflects a challenging degree of class imbalance, where the probability of having any positives for  
562 a class in a validation image is low. Thus, we did not use the computed recall and precision of the  
563 individual images or the mean recall and precision to compute the mean F1 score, i.e., the harmonic  
564 mean of recall and precision. This has been shown to lead to bias, especially when a high degree

565 of class imbalance is present in the dataset (Forman and Scholz, 2010) as it may result in undefined  
566 values for an image for recall (due to the absence of TP), precision (in case the CNN does not  
567 recognize the few positives), and F1 score (in case either recall or precision are undefined). To  
568 avoid bias, we computed the total TP, FP, and FN of all validation images from which we  
569 calculated the mean F1 score (Forman and Scholz, 2010):

$$570 \quad \text{mean F1 score} = \frac{2 * TP_{total}}{2 * TP_{total} + FP_{total} + FN_{total}}$$

571 In addition, we computed a consensus label between human expert 1 and 2, 1 and 3 as well as 2  
572 and 3 and compared the EntireAxon CNN versus the remaining expert (human expert 3, 2, and 1,  
573 respectively) to the consensus labels. Mean F1 scores for all classes were computed as described  
574 above.

575

## 576 **Image preprocessing**

577 Prior to the analysis of AxD after hemin exposure, we preprocessed the time-lapse recordings in  
578 ImageJ (v1.52a, RRID: RRID:SCR\_003070) using a custom-written macro. Specifically, each  
579 individual recording was converted from a 16-bit into an 8-bit recording to make it compatible  
580 with the ImageNet (8-bit) pre-trained ResNet-50. The recording was aligned automatically with  
581 the ImageJ plug-in “Linear Stack Alignment with SIFT” as described previously (Lowe, 2004).  
582 The following settings were used: initial Gaussian blur of 1.6 pixel, 3 steps per scale octave,  
583 minimum image size of 64 pixel, maximum image size of 1024 pixel, feature descriptor size of 4,  
584 8 feature descriptor orientation bins, closest/next closest ratio of 0.92, maximal alignment error of  
585 25 pixel; inlier ratio of 0.05, expected transformation as rigid, “interpolate” and “show info”  
586 checked. Black edges appearing on the recording after alignment were cropped.

587

## 588 **AxD analysis using the EntireAxon CNN**

589 All recordings of AxD after hemin exposure were automatically analyzed by the trained  
590 EntireAxon CNN, which classified each pixel as one of the four different classes ‘background’,  
591 ‘axon’, ‘axonal swelling’, and ‘axonal fragment. For each experimental condition (i.e. hemin  
592 concentration), the sum percentage of all pixels per class on all images of that experimental day  
593 were added at each time point (‘Axon<sub>t1.5-24h</sub>, Axonal swelling<sub>t1.5-24h</sub>, Axonal fragment<sub>t1.5-24h</sub>). To  
594 determine the changes for the classes ‘axon’, ‘axonal swelling’, and ‘axonal fragment’ over time,  
595 we calculated the sum percentage of pixels for all given time points ( $t_i$  with  $I = 1.5$  to 24 hours) of  
596 the corresponding class over the sum of the pixels of all three classes at baseline:

$$\begin{aligned} 597 \quad & \text{normalized 'class' area } (t_i) \\ 598 \quad & = \frac{\text{'Class' }_{t_i}}{\text{Axon}_{t1.5h} + \text{Axonal swelling}_{t1.5h} + \text{Axonal fragments}_{t1.5h}} * 100 \end{aligned}$$

599

## 600 **Classification of the morphological patterns of AxD using attention-based RNN**

601 We used the segmentation videos derived from the original microscopic images using the CNN to  
602 identify four morphological patterns of AxD: granular, retraction, swelling, and transport  
603 degeneration (**Fig 7A**). To reduce the dimensions of the input, the segmentation video was  
604 converted into a series of normalized histograms ( $H$ ), one for each (time) frame. Thus, the RNN  
605 did not operate on the microscopic images directly, but rather on more efficient representations of  
606 the data. To compute a histogram for a frame  $t_i$ , we compared the pixels of the frames  $t_i$  and  $t_{i+1}$ .  
607 Each pixel was assigned into one of 16 classes that consisted of pairs  $(c_1, c_2) \in \{0,1,2,3\}^2$  of the  
608 four segmentation classes (i.e., four times four possible configurations, 16 class pairs). For  
609 example, the class (background, axon) means that in frame  $t_i$ , the pixel was classified as  
610 background, while in frame  $t_{i+1}$ , it was an axon pixel. For  $T$  time steps, we therefore computed  $T-1$   
611 histograms.  $H_0(t_i, (c_1, c_2))$  is the number of pixels that belong to class  $c_1$  at time-frame  $t_i$  and

612 that belong to  $c_2$  at time-frame  $t_{i+1}$ . Additionally, we normalized each histogram to sum up to 1  
 613 (i.e. we divided by the sum over all pairs):

$$614 \quad H(t_i, (c_1, c_2)) = H_0(t_i, (c_1, c_2)) / \sum_{a,b} H_0(t_i, (a, b))$$

615 Of note, the histograms were computed over small patches (height and width < 90 pixels) during  
 616 training and during inference on windows of size 32x32 pixels.

617 We used an encoder-decoder RNN with attention (Bahdanau et al., 2016). The encoder  $f_{enc}$   
 618 consisted of a gated recurrent unit (GRU) that obtained the histogram time sequence  $H$  as input.  
 619 The encoder computed the hidden representation of the histograms:

$$620 \quad V = f_{enc}(H); V \in \mathbb{R}^T \times d, H \in \mathbb{R}^T \times 16$$

621 For our purpose, we used an architecture that was able to base the decision for a degeneration class  
 622 on the previous class predictions. To this end, the output  $\vec{o}_i$  was computed iteratively in  $C+1$  steps  
 623 as a sum of the previous output and the output of the decoder  $f_{dec}$ :

$$624 \quad \vec{o}_i = \vec{o}_{i-1} + f_{dec}(\sigma(\vec{o}_{i-1}), \vec{s}_{i-1}); \vec{o} \in \mathbb{R}^C, \vec{s}_{i-1} \in \mathbb{R}^d$$

$$625 \quad f_{dec}(\sigma(\vec{o}_{i-1}), \vec{s}_{i-1}) = W_{out} \vec{z}_i; W_{out} \in \mathbb{R}^{C \times d}$$

626  $C$  is the number of degeneration classes (4) and  $d$  is the hidden dimension (we used 256);  $i =$   
 627  $1, I, C + 1$ .  $\sigma$  is the sigmoid function. The decoder employed a GRU that depended on the context  
 628 vector  $\vec{c}_i$  and the hidden state vector  $\vec{s}_{i-1}$ :

$$629 \quad \vec{z}_i, \vec{s}_i = GRU(\vec{c}_i, \vec{s}_{i-1}); \vec{z}_i \in \mathbb{R}^d$$

630 The entries of the initial hidden vector  $\vec{s}_1$  were all zero. The context vector is a weighted sum of  
 631 the encoder representations. At each iteration, these weights can change, enabling the network to  
 632 focus on different time-steps. We assumed that a specific pattern of degeneration happened only

633 in a limited number of time frames that were fewer than the whole input video. The weights  
634 depended on the current state of the decoder and the current output:

$$635 \quad \vec{c}_i = V^T \vec{\alpha}_i; \vec{\alpha}_i \in \mathbb{R}^T$$

$$636 \quad \vec{\alpha}_i = \text{Softmax}(W_{att} [\vec{s}_{i-1}, \text{ReLU}(W_{in} \vec{o}_{i-1})]); W_{att} \in \mathbb{R}^{T \times 2d}, W_{in} \in \mathbb{R}^{d \times c}$$

637 Here,  $[\vec{a}, \vec{b}]$  is the concatenation of two vectors. The final output  $y$  is normalized by the sigmoid  
638 function:

$$639 \quad y = \sigma(\vec{o}_{C+1}) \in [0, 1]^c.$$

640 Apart from the weights used by the GRUs,  $W_{in}$ ,  $W_{att}$ , and  $W_{out}$  are learnable weights.

641 The EntireAxon RNN was trained with 162 images for 60 epochs using the lamb optimizer (You  
642 et al., 2020) with a batch size of 128. We used a learning rate of 0.01 that was reduced by a factor  
643 of ten every 15 epochs and an additional weight decay of 0.0001. The two GRUs (encoder and  
644 decoder) contained three layers, and we used dropout with a p-value of 0.9. To increase the RNN  
645 robustness against varying axon thickness, we also added eroded versions of the segmentation data  
646 using a cross-shape as kernel with the sizes three, five, and seven. Accordingly, each image existed  
647 six times in the dataset: three eroded versions and three unchanged copies, to keep a 50 % chance  
648 of having the original image for training.

649

## 650 **RNN cluster analysis**

651 The unnormalized class output  $\vec{o}_{C+1}$  was computed by the matrix-vector product  $W_{out} \vec{z}_{C+1}$ . Where  
652  $\vec{z}_{C+1}$  was a 256-dimensional vector representation of the input sample, computed by the model.  
653 For the classes to be linearly separable, the vector representations of each class needed to be close  
654 to each other in the 256-dimensional space. To visualize the relationships of the specific samples,

655 we employed t-distributed stochastic neighborhood embedding (T-SNE) to compute a 2-  
656 dimensional representation of the high-dimensional data.

657

### 658 **Ten-fold cross-validation of the RNN**

659 To validate the RNN, we used ten-fold cross-validation (Hastie et al., 2009). The dataset  $S$  was  
660 divided into 10 subsets, ensuring that each subset included at least one sample of each class:  $S =$   
661  $\bigcup_{i=1}^{10} S_i$ ;  $S_i \cap S_j = \emptyset, i \neq j$ . We trained ten models for  $i=1, \dots, 10$  on  $Train_i = S / S_i$  and test  
662 them on  $Test_i = S_i$ . Subsequently, we combined and evaluated all test samples  $Test =$   
663  $\bigcup_{i=1}^{10} Test_i$ . Mean recall, precision, and F1 score were determined as described above.

664

### 665 **Analysis of morphological pattern of AxD using the EntireAxon RNN**

666 All AxD segmentations after hemin exposure were automatically analyzed with the trained  
667 EntireAxon RNN, which predicted the occurrence of the four morphological patterns of AxD in a  
668 pixel-wise manner. Of note, a pixel can be predicted to belong to 0, 1 or multiple morphological  
669 patterns. Only pixels previously identified as degenerated over time were considered by applying  
670 a ‘fragmentation mask’ that included all no-background pixels that changed to either background  
671 or fragment during the recording time.

672 For each experimental condition (i.e., hemin concentration), the percentage of the occurrence of  
673 each morphological pattern was calculated as the sum of all pixels per morphological pattern on  
674 all images of that experimental day divided by the ‘fragmentation mask’ as follows:

675 
$$'morphological\ pattern'[\%]$$

$$676 = \frac{\sum pixel\ of\ morphological\ pattern_i}{\sum pixel\ no\ background \rightarrow background\ or\ fragment} * 100$$

677

## 678 **Statistical analysis**

679 Six biological replicates for each concentration were employed in each experiment to assess  
680 hemin-induced AxD. We did not perform a priori power analysis as this was an exploratory study.  
681 Normality was evaluated with the Kolmogorov-Smirnov test, variance homogeneity using the  
682 Levené test, and sphericity by the Mauchly test. When the data were normally distributed and  
683 variance homogeneity was met, one-way ANOVA followed by the Bonferroni post hoc test was  
684 performed. In case the data were not normally distributed, the Kruskal-Wallis test was performed  
685 for multiple comparisons of independent groups followed by the post hoc Mann-Whitney U test  
686 with  $\alpha$ -correction according to Bonferroni to adjust for the inflation of type I error due to multiple  
687 testing. For the repeated testing with covariates, a repeated measures ANOVA was performed with  
688 Greenhouse-Geisser adjustment if sphericity was not given. Linear regressions were performed  
689 for AxD patterns. Data are represented as mean  $\pm$  95 % confidence interval (CI) except for the  
690 nonparametric data of the AUC for axonal fragments, where medians are given. A value of  
691  $P < 0.05$  was considered statistically significant. For the Kruskal-Wallis test followed by Mann-  
692 Whitney U,  $P = 0.05/k$  was used, with  $k$  as the number of single hypotheses.  $K = 3$  for AUC  
693 analyses (comparison of three different concentrations of hemin vs. 0  $\mu$ M hemin), thus  $\alpha = 0.0167$   
694 was considered statistically significant.  $K = 6$  for the comparison of the linear regression slopes  
695 (comparison of the four AxD patterns against each other), thus  $\alpha = 0.0083$  was considered  
696 statistically significant. The detailed statistical analyses can be found in **Tables S1-3**. All statistical  
697 analyses were performed with IBM SPSS version 23 (RRID:SCR\_002865), except linear  
698 regressions that were performed with GraphPad Prism version 8 (RRID:SCR\_002798).



699 **List of abbreviations**

|     |      |                              |
|-----|------|------------------------------|
| 700 | AxD  | axonal degeneration          |
| 701 | CNN  | convolutional neural network |
| 702 | FP   | false positive               |
| 703 | FN   | false negative               |
| 704 | GRU  | gated recurrent unit         |
| 705 | PBS  | phosphate buffered saline    |
| 706 | PDMS | polydimethylsiloxane         |
| 707 | PMMA | polymethyl methacrylate      |
| 708 | RNN  | recurrent neural network     |
| 709 | TP   | true positive                |

710

## 711 **Declarations**

712

## 713 **Acknowledgments**

714 This research was supported by a Fraunhofer MEF grant of the Fraunhofer Society (project number  
715 600199) and by the Joachim Herz Stiftung (project number 850022) to M.Z. We would like to  
716 thank Sebastian Kärst for his technical assistance regarding the choice of materials for the  
717 prototype of the microfluidic device. We would like to thank Dennis Wendt for his help in  
718 designing the blueprint of the prototype of the microfluidic device.

719

## 720 **Authors' contributions**

721 M.Z. designed the experiments. A. Palumbo, A. Pabst and M.Z. designed the device. A. Palumbo,  
722 A. Pabst, S.P., R.S., C.K., and N.K. carried out the fabrication of the device. S.K.L. performed the  
723 immunostaining of the somata and axons and analyzed the respective data. P.G. and A.M.M.  
724 developed the deep learning tool, P.G., L.E.H., and L.B. developed the algorithms to retrieve the  
725 output. A. Palumbo, S.K.L. and L.E.H. labeled the images for the deep learning training and  
726 validation. A. Palumbo and C.F. performed the time-lapse recordings of AxD. A. Palumbo  
727 conducted the live cell imaging, the determination of the morphological patterns of AxD and  
728 analyzed the data for the respective experiments. A. Palumbo, P.G., A.M.M., J.B., and M.Z.  
729 discussed and interpreted the data. M.Z. performed the statistical analysis. A. Palumbo, M.I. and  
730 M.Z. performed the graphical artwork. A. Palumbo, P.G., and M.Z wrote the manuscript. All  
731 authors discussed and commented on the final version of the manuscript.

732

## 733 **Ethics approval**

734 Animal experiments followed the protocol of the “NIH Guide for the care and use of laboratory  
735 animals” and were approved by the Schleswig-Holstein Ministry for Energy Transition,

736 Agriculture, Environment, Nature and Digitalization (under the prospective contingent animal  
737 license number 2017-07-06 Zille).

738

739 **Data availability statement**

740 All data needed to evaluate the conclusions in the paper are present in the paper and/or the

741 **Supporting information.** The time-lapse data and code are available upon reasonable request to

742 the corresponding authors. We plan to launch a website to enable other researchers to use the tool.

743

744 **Competing interests**

745 A. Palumbo, P.G., and M.Z. declare that they have filed a patent for the microfluidic device and

746 the EntireAxon deep learning algorithm to quantify axonal degeneration (European Patent Office,

747 file number: 20152016.0, in revision). All other authors declare that they have no competing

748 interests.

## 749 **References**

- 750 Bahdanau, D., K. Cho, and Y. Bengio. 2016. Neural Machine Translation by Jointly Learning to  
751 Align and Translate. *arXiv:1409.0473 [cs, stat]*.
- 752 Becker, T., and A. Madany. 2012. Morphology-based Features for Adaptive Mitosis Detection of  
753 In Vitro Stem Cell Tracking Data. *Methods Inf Med.* 51:449–456. doi:10.3414/ME11-02-  
754 0038.
- 755 Beirowski, B., R. Adalbert, D. Wagner, D.S. Grumme, K. Addicks, R.R. Ribchester, and M.P.  
756 Coleman. 2005. The progressive nature of Wallerian degeneration in wild-type and slow  
757 Wallerian degeneration (WldS) nerves. *BMC Neurosci.* 6:6. doi:10.1186/1471-2202-6-6.
- 758 Biffi, E. 2015. Microfluidic and Compartmentalized Platforms for Neurobiological Research.
- 759 Bishop, D.L., T. Misgeld, M.K. Walsh, W.-B. Gan, and J.W. Lichtman. 2004. Axon Branch  
760 Removal at Developing Synapses by Axosome Shedding. *Neuron.* 44:651–661.  
761 doi:10.1016/j.neuron.2004.10.026.
- 762 Cavanagh, J.B. 1979. The “dying back” process. A common denominator in many naturally  
763 occurring and toxic neuropathies. *Arch. Pathol. Lab. Med.* 103:659–664.
- 764 Chen, J., and R.F. Regan. 2004. Heme oxygenase-2 gene deletion increases astrocyte  
765 vulnerability to hemin. *Biochemical and Biophysical Research Communications.* 318:88–  
766 94. doi:10.1016/j.bbrc.2004.03.187.
- 767 Chen, X., X. Chen, Y. Chen, M. Xu, T. Yu, and J. Li. 2018. The Impact of Intracerebral  
768 Hemorrhage on the Progression of White Matter Hyperintensity. *Front. Hum. Neurosci.*  
769 12:471. doi:10.3389/fnhum.2018.00471.
- 770 Coleman, M.P. 2005. Axon degeneration mechanisms: commonality amid diversity. *Nat Rev*  
771 *Neurosci.* 6:889–898. doi:10.1038/nrn1788.
- 772 Cui, Y., X. Jin, D.-J. Choi, J.Y. Choi, H.S. Kim, D.H. Hwang, and B.G. Kim. 2020. Axonal  
773 degeneration in an in vitro model of ischemic white matter injury. *Neurobiology of*  
774 *Disease.* 134:104672. doi:10.1016/j.nbd.2019.104672.
- 775 Deng, J., W. Dong, R. Socher, L.-J. Li, Kai Li, and Li Fei-Fei. 2009. ImageNet: A large-scale  
776 hierarchical image database. *In* 2009 IEEE Conference on Computer Vision and Pattern  
777 Recognition. IEEE, Miami, FL. 248–255.
- 778 Dietterich, T.G. 2000. Ensemble Methods in Machine Learning. *In* Multiple Classifier Systems.  
779 Springer Berlin Heidelberg, Berlin, Heidelberg. 1–15.
- 780 Forman, G., and M. Scholz. 2010. Apples-to-apples in cross-validation studies: pitfalls in  
781 classifier performance measurement. *SIGKDD Explor. Newsl.* 12:49.  
782 doi:10.1145/1882471.1882479.
- 783 Grüning, P., Palumbo, A., Zille, M., Barth, E., and Madany Mamlouk, Amir. 2020. A task-  
784 dependent active learning method for axon segmentation with CNNs. *Proc AUTOMED.*  
785 1. doi:10.18416/AUTOMED.2020.

- 786 Hastie, T., R. Tibshirani, and J. Friedman. 2009. *The Elements of Statistical Learning*. Springer  
787 New York, New York, NY.
- 788 He, K., X. Zhang, S. Ren, and J. Sun. 2015. Deep Residual Learning for Image Recognition.  
789 *arXiv:1512.03385 [cs]*.
- 790 Hemorrhagic Stroke Academia Industry (HEADS) Roundtable Participants. 2018. Basic and  
791 Translational Research in Intracerebral Hemorrhage: Limitations, Priorities, and  
792 Recommendations. *Stroke*. 49:1308–1314. doi:10.1161/STROKEAHA.117.019539.
- 793 Ho, S.-Y., C.-Y. Chao, H.-L. Huang, T.-W. Chiu, P. Charoenkwan, and E. Hwang. 2011.  
794 NeurphologyJ: An automatic neuronal morphology quantification method and its  
795 application in pharmacological discovery. *BMC Bioinformatics*. 12:230.  
796 doi:10.1186/1471-2105-12-230.
- 797 Hosmane, S., I.H. Yang, A. Ruffin, N. Thakor, and A. Venkatesan. 2010. Circular  
798 compartmentalized microfluidic platform: Study of axon–glia interactions. *Lab Chip*.  
799 10:741. doi:10.1039/b918640a.
- 800 Huang, H.-K., C.-F. Chiu, C.-H. Kuo, Y.-C. Wu, N.N.Y. Chu, and P.-C. Chang. 2016. Mixture  
801 of deep CNN-based ensemble model for image retrieval. *In* 2016 IEEE 5th Global  
802 Conference on Consumer Electronics. IEEE, Kyoto, Japan. 1–2.
- 803 Kerschensteiner, M., M.E. Schwab, J.W. Lichtman, and T. Misgeld. 2005. In vivo imaging of  
804 axonal degeneration and regeneration in the injured spinal cord. *Nat Med*. 11:572–577.  
805 doi:10.1038/nm1229.
- 806 Li, Y., M. Yang, Z. Huang, X. Chen, M.T. Maloney, L. Zhu, J. Liu, Y. Yang, S. Du, X. Jiang,  
807 and J.Y. Wu. 2014. AxonQuant: A Microfluidic Chamber Culture-Coupled Algorithm  
808 That Allows High-Throughput Quantification of Axonal Damage. *Neurosignals*. 22:14–  
809 29. doi:10.1159/000358092.
- 810 Lingor, P., J.C. Koch, L. Tönges, and M. Bähr. 2012. Axonal degeneration as a therapeutic target  
811 in the CNS. *Cell Tissue Res*. 349:289–311. doi:10.1007/s00441-012-1362-3.
- 812 Lowe, D.G. 2004. Distinctive Image Features from Scale-Invariant Keypoints. *International*  
813 *Journal of Computer Vision*. 60:91–110. doi:10.1023/B:VISI.0000029664.99615.94.
- 814 Luo, L., and D.D.M. O’Leary. 2005. Axon Retraction and Degeneration in Development and  
815 Disease. *Annu. Rev. Neurosci*. 28:127–156.  
816 doi:10.1146/annurev.neuro.28.061604.135632.
- 817 Maor-Nof, M., E. Romi, H. Sar Shalom, V. Ulisse, C. Raanan, A. Nof, D. Leshkowitz, R. Lang,  
818 and A. Yaron. 2016. Axonal Degeneration Is Regulated by a Transcriptional Program  
819 that Coordinates Expression of Pro- and Anti-degenerative Factors. *Neuron*. 92:991–  
820 1006. doi:10.1016/j.neuron.2016.10.061.
- 821 Neukomm, L.J., and M.R. Freeman. 2014. Diverse cellular and molecular modes of axon  
822 degeneration. *Trends in Cell Biology*. 24:515–523. doi:10.1016/j.tcb.2014.04.003.
- 823 Nikić, I., D. Merkler, C. Sorbara, M. Brinkoetter, M. Kreutzfeldt, F.M. Bareyre, W. Brück, D.  
824 Bishop, T. Misgeld, and M. Kerschensteiner. 2011. A reversible form of axon damage in

- 825 experimental autoimmune encephalomyelitis and multiple sclerosis. *Nat Med.* 17:495–  
826 499. doi:10.1038/nm.2324.
- 827 Nikolaev, A., T. McLaughlin, D.D.M. O’Leary, and M. Tessier-Lavigne. 2009. APP binds DR6  
828 to trigger axon pruning and neuron death via distinct caspases. *Nature.* 457:981–989.  
829 doi:10.1038/nature07767.
- 830 Park, J.W., B. Vahidi, A.M. Taylor, S.W. Rhee, and N.L. Jeon. 2006. Microfluidic culture  
831 platform for neuroscience research. *Nat Protoc.* 1:2128–2136.  
832 doi:10.1038/nprot.2006.316.
- 833 Pease, S.E., and R.A. Segal. 2014. Preserve and protect: maintaining axons within functional  
834 circuits. *Trends in Neurosciences.* 37:572–582. doi:10.1016/j.tins.2014.07.007.
- 835 Pease-Raissi, S.E., M.F. Pazyra-Murphy, Y. Li, F. Wachter, Y. Fukuda, S.J. Fenstermacher, L.A.  
836 Barclay, G.H. Bird, L.D. Walensky, and R.A. Segal. 2017. Paclitaxel Reduces Axonal  
837 Bclw to Initiate IP3R1-Dependent Axon Degeneration. *Neuron.* 96:373–386.e6.  
838 doi:10.1016/j.neuron.2017.09.034.
- 839 Pool, M., J. Thiemann, A. Bar-Or, and A.E. Fournier. 2008. NeuriteTracer: A novel ImageJ  
840 plugin for automated quantification of neurite outgrowth. *Journal of Neuroscience*  
841 *Methods.* 168:134–139. doi:10.1016/j.jneumeth.2007.08.029.
- 842 Robinson, S.R., T.N. Dang, R. Dringen, and G.M. Bishop. 2009. Hemin toxicity: a preventable  
843 source of brain damage following hemorrhagic stroke. *Redox Report.* 14:228–235.  
844 doi:10.1179/135100009X12525712409931.
- 845 Ronneberger, O., P. Fischer, and T. Brox. 2015. U-Net: Convolutional Networks for Biomedical  
846 Image Segmentation. *arXiv:1505.04597 [cs]*.
- 847 Salvadores, N., M. Sanhueza, P. Manque, and F.A. Court. 2017. Axonal Degeneration during  
848 Aging and Its Functional Role in Neurodegenerative Disorders. *Front. Neurosci.* 11:451.  
849 doi:10.3389/fnins.2017.00451.
- 850 Sasaki, Y., B.P.S. Vohra, F.E. Lund, and J. Milbrandt. 2009. Nicotinamide Mononucleotide  
851 Adenylyl Transferase-Mediated Axonal Protection Requires Enzymatic Activity But Not  
852 Increased Levels of Neuronal Nicotinamide Adenine Dinucleotide. *Journal of*  
853 *Neuroscience.* 29:5525–5535. doi:10.1523/JNEUROSCI.5469-08.2009.
- 854 Saxena, S., and P. Caroni. 2007. Mechanisms of axon degeneration: From development to  
855 disease. *Progress in Neurobiology.* 83:174–191. doi:10.1016/j.pneurobio.2007.07.007.
- 856 Tang-Schomer, M.D., V.E. Johnson, P.W. Baas, W. Stewart, and D.H. Smith. 2012. Partial  
857 interruption of axonal transport due to microtubule breakage accounts for the formation  
858 of periodic varicosities after traumatic axonal injury. *Experimental Neurology.* 233:364–  
859 372. doi:10.1016/j.expneurol.2011.10.030.
- 860 Tao, C., X. Hu, H. Li, and C. You. 2017. White Matter Injury after Intracerebral Hemorrhage:  
861 Pathophysiology and Therapeutic Strategies. *Front. Hum. Neurosci.* 11:422.  
862 doi:10.3389/fnhum.2017.00422.

- 863 Van Laar, V., B. Arnold, and S. Berman. 2019. Primary Embryonic Rat Cortical Neuronal  
864 Culture and Chronic Rotenone Treatment in Microfluidic Culture Devices. *BIO-*  
865 *PROTOCOL*. 9. doi:10.21769/BioProtoc.3192.
- 866 Venkatasubramanian, C., J.T. Kleinman, N.J. Fischbein, J. Olivot, A.D. Gean, I. Eyngorn, R.W.  
867 Snider, M. Mlynash, and C.A.C. Wijman. 2013. Natural History and Prognostic Value of  
868 Corticospinal Tract Wallerian Degeneration in Intracerebral Hemorrhage. *JAHA*. 2.  
869 doi:10.1161/JAHA.113.000090.
- 870 Vuola, A.O., S.U. Akram, and J. Kannala. 2019. Mask-RCNN and U-Net Ensembled for Nuclei  
871 Segmentation. In 2019 IEEE 16th International Symposium on Biomedical Imaging  
872 (ISBI 2019). IEEE, Venice, Italy. 208–212.
- 873 Wang, J.T., Z.A. Medress, and B.A. Barres. 2012. Axon degeneration: Molecular mechanisms of  
874 a self-destruction pathway. *J Cell Biol*. 196:7–18. doi:10.1083/jcb.201108111.
- 875 Yong, Y., K. Gamage, I. Cheng, K. Barford, A. Spano, B. Winckler, and C. Deppmann. 2019.  
876 p75NTR and DR6 Regulate Distinct Phases of Axon Degeneration Demarcated by  
877 Spheroid Rupture. *J. Neurosci*. 39:9503–9520. doi:10.1523/JNEUROSCI.1867-19.2019.
- 878 You, Y., J. Li, S. Reddi, J. Hseu, S. Kumar, S. Bhojanapalli, X. Song, J. Demmel, K. Keutzer,  
879 and C.-J. Hsieh. 2020. Large Batch Optimization for Deep Learning: Training BERT in  
880 76 minutes. *arXiv:1904.00962 [cs, stat]*.
- 881 Zille, M., S.S. Karuppagounder, Y. Chen, P.J. Gough, J. Bertin, J. Finger, T.A. Milner, E.A.  
882 Jonas, and R.R. Ratan. 2017. Neuronal Death After Hemorrhagic Stroke In Vitro and In  
883 Vivo Shares Features of Ferroptosis and Necroptosis. *Stroke*. 48:1033–1043.  
884 doi:10.1161/STROKEAHA.116.015609.
- 885



886 **Figure legends**

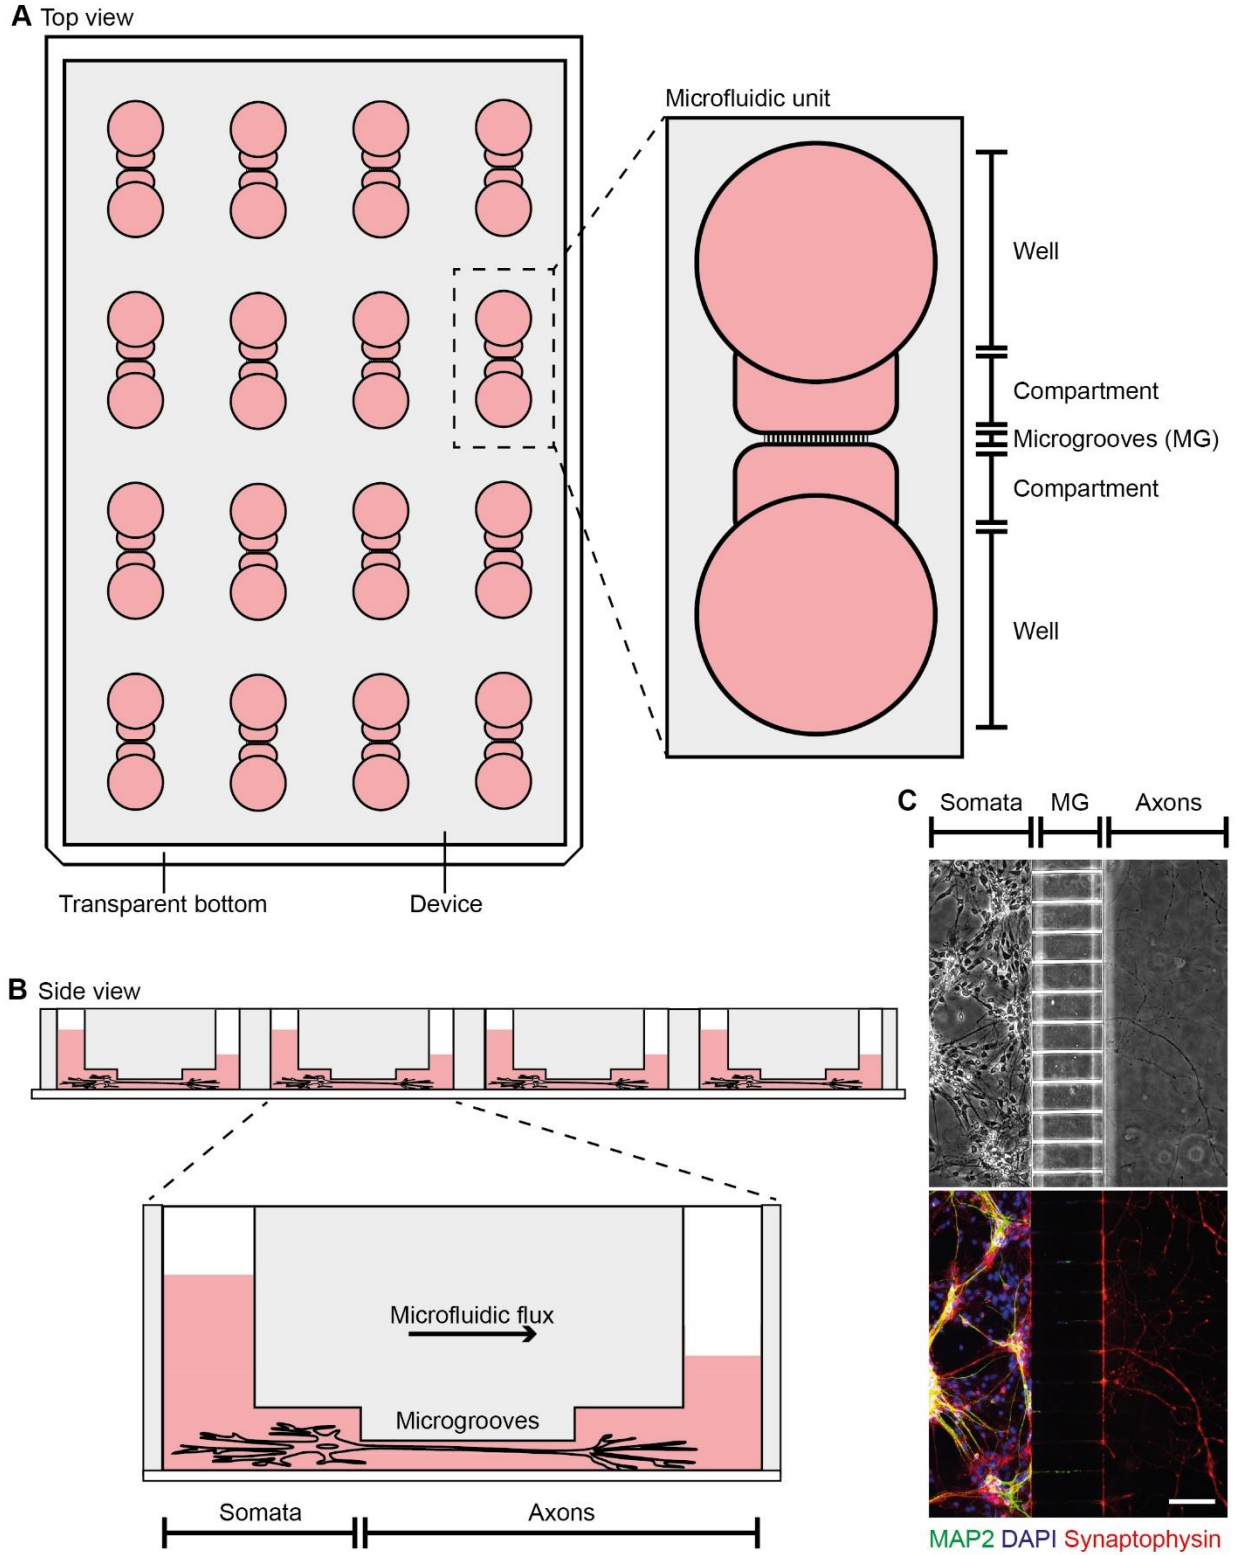

887

888 **Figure 1. Microfluidic device for the enhanced throughput cultivation of axons.** (A) The microfluidic device  
889 incorporates 16 individual microfluidic units for axon cultivation. One microfluidic unit consists of two wells that are  
890 connected through compartments and microgrooves (MG). (B) Primary cortical neurons are seeded into the soma



891 compartment from which their axons grow through the MG into the axon compartment. Directed growth is supported  
892 by culture medium microflux due to different medium volumes between the two wells. (C) Phase-contrast image of  
893 primary cortical axons that were spatially separated from their somata by the MG at day *in vitro* 7, which we confirmed  
894 by immunofluorescence staining of dendrites using microtubule-associated protein 2 (MAP2, green, 1:4000) and  
895 axons using synaptophysin (red, 1:250). DAPI (blue, 1:1000) was used for nuclear counterstaining (top). Scale  
896 bar: 100  $\mu$ m.

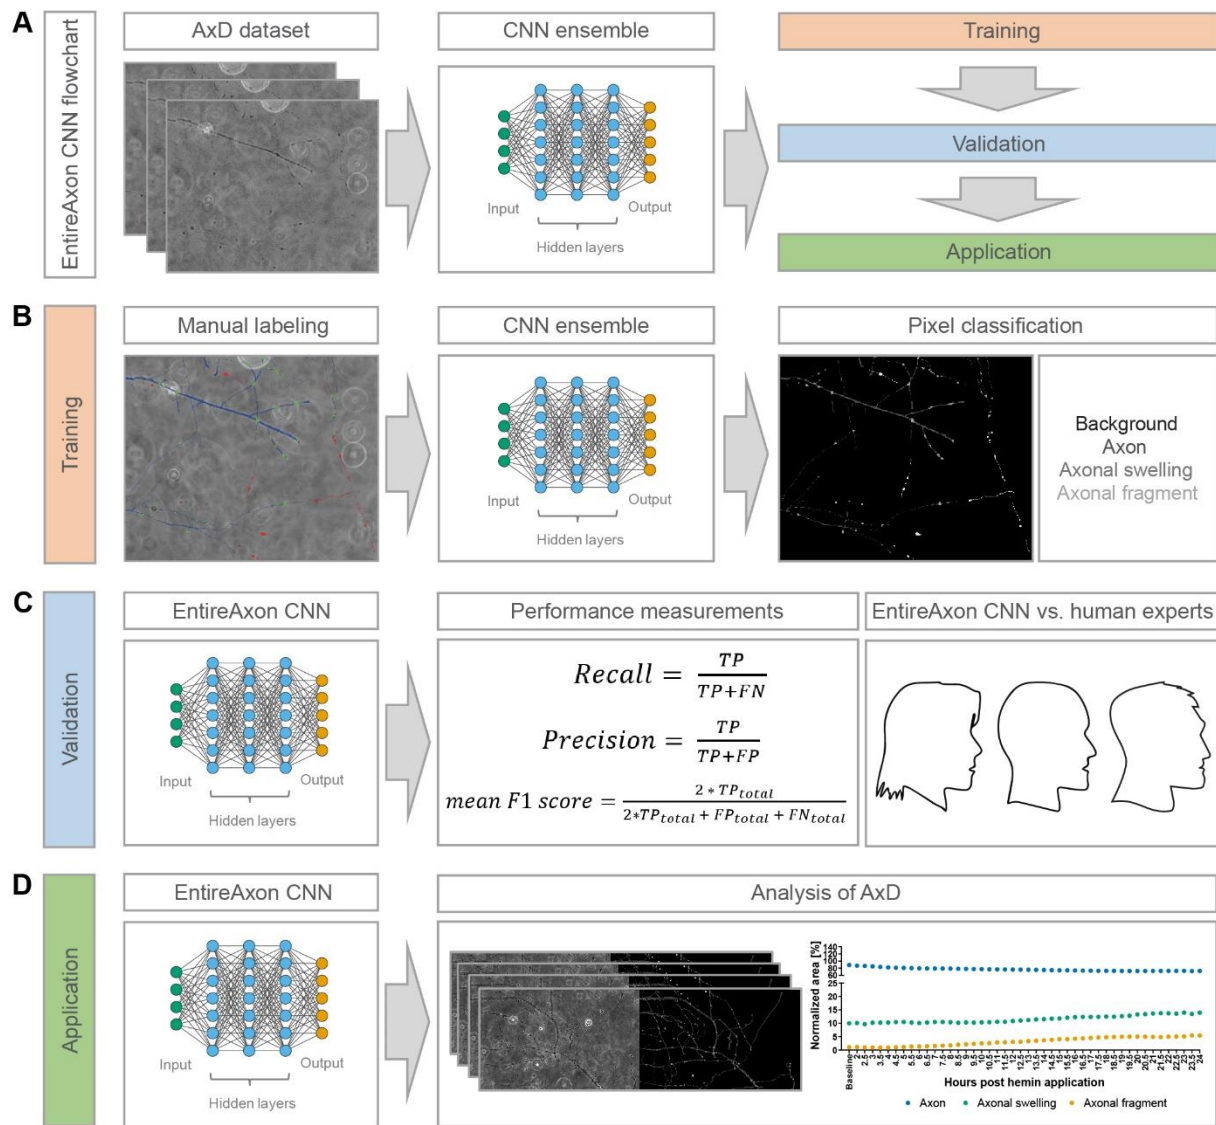

897

898 **Figure 2. EntireAxon CNN for the enhanced throughput analysis of AxD.** (A) The flow chart of the EntireAxon  
 899 CNN. The AxD data was separated into training, validation, and testing data. We adapted a standard u-net with  
 900 ResNet-50 encoder (Ronneberger et al., 2015; He et al., 2015) and used a CNN ensemble, which combines predictions  
 901 from multiple CNNs to generate a final output and is superior to individual CNNs (Dietterich, 2000; Huang et al.,  
 902 2016; Vuola et al., 2019). (B) We manually labeled the training data to segment each pixel into the four classes  
 903 ‘background’, ‘axon’, ‘axonal swelling’, and ‘axonal fragment’, which are displayed in the output image in black,  
 904 dark grey, intermediate grey, and light grey, respectively. We trained an ensemble comprising 8 CNNs to segment the  
 905 four classes. (C) The EntireAxon CNN was validated with a separate validation dataset to assess its performance  
 906 (recall, precision, and mean F1 score), which was compared to human experts (ground truth was labeled by human  
 907 expert 1). (D) The EntireAxon CNN was applied to data on AxD induced by the exposure of hemin, which is used to  
 908 model of hemorrhagic stroke *in vitro*.

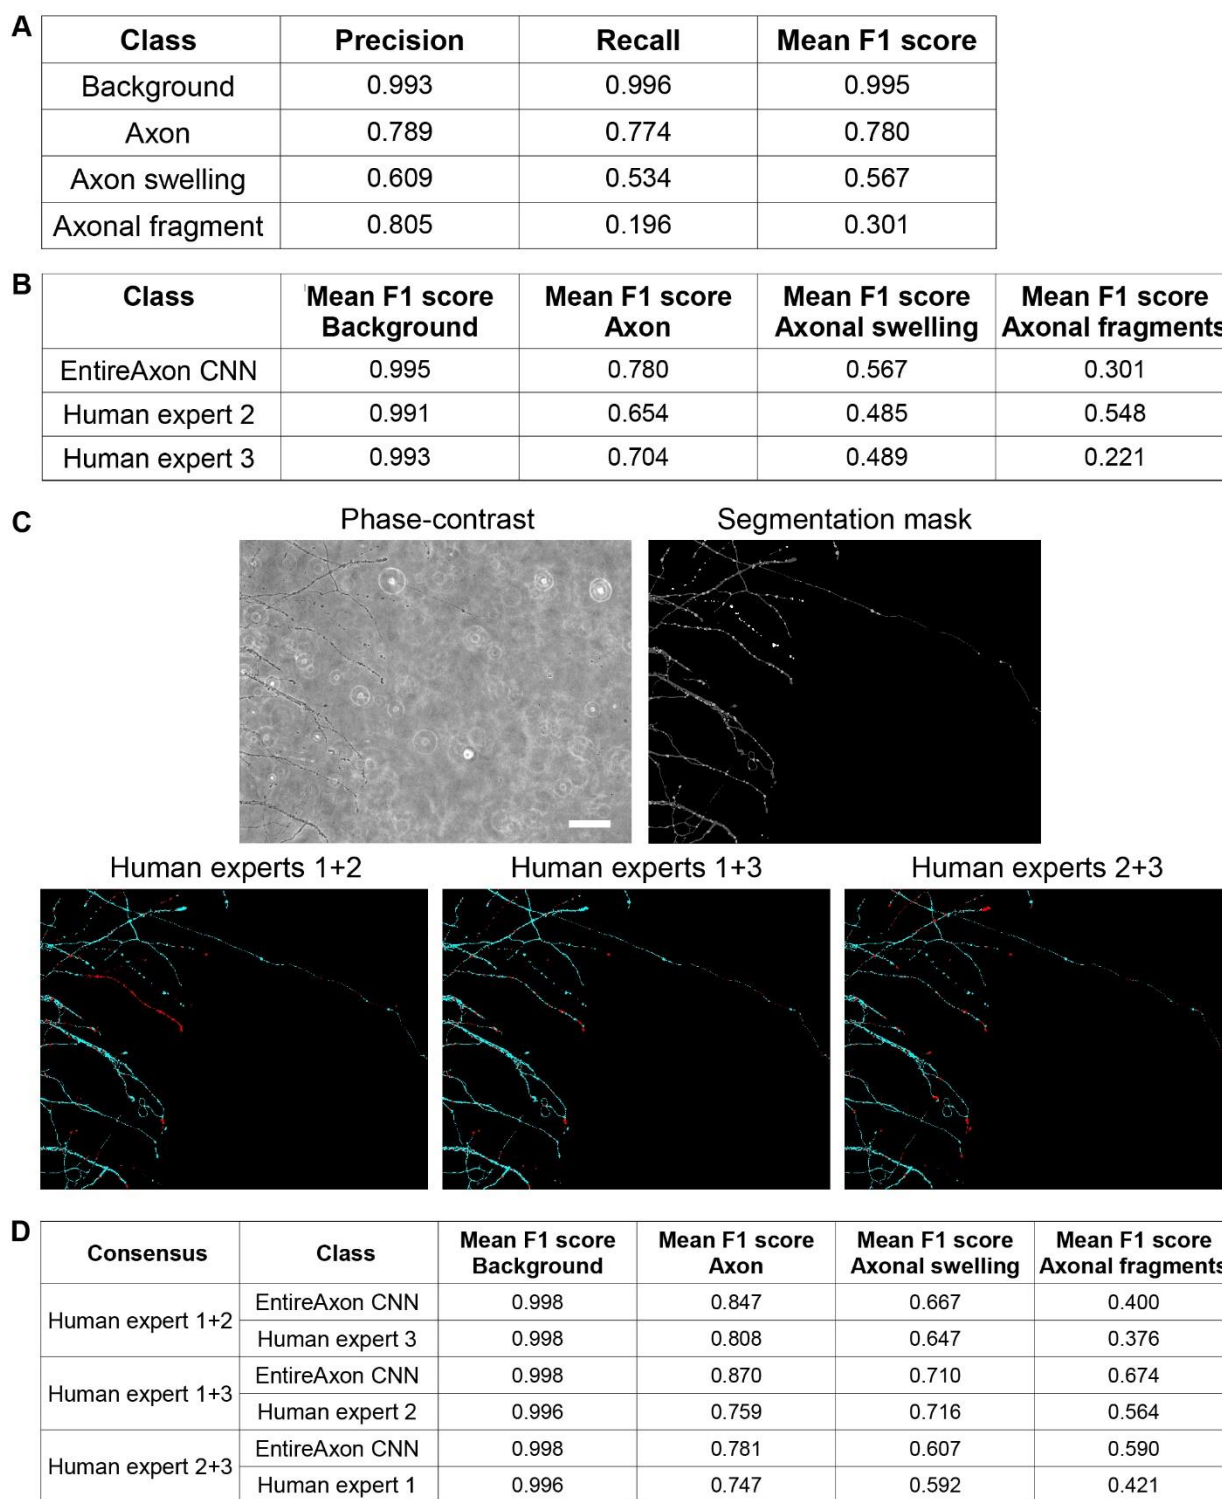

909

910 **Figure 3. Performance of the EntireAxon CNN compared to human experts. (A)** Validation of the EntireAxon  
 911 CNN performance for all four classes ‘background’, ‘axon’, ‘axonal swelling’ and ‘axonal fragment’ in before unseen  
 912 phase-contrast microscopic images. **(B)** Comparison of the mean F1 scores between the EntireAxon CNN and two  
 913 human experts on the ground truth (human expert 1 who also labeled the training images) to recognize background,  
 914 axon, axonal swelling and axonal fragments. **(C)** Phase-contrast validation image, its EntireAxon CNN segmentation

915 mask, and the consensus labeling masks of two human experts that show the segmentation overlap (cyan) or difference  
916 (red) between the labels. Scale bar: 100  $\mu\text{m}$ . **(D)** Comparison of the mean F1 scores between the EntireAxon CNN  
917 and the human expert on the consensus labeling of the other two human experts.

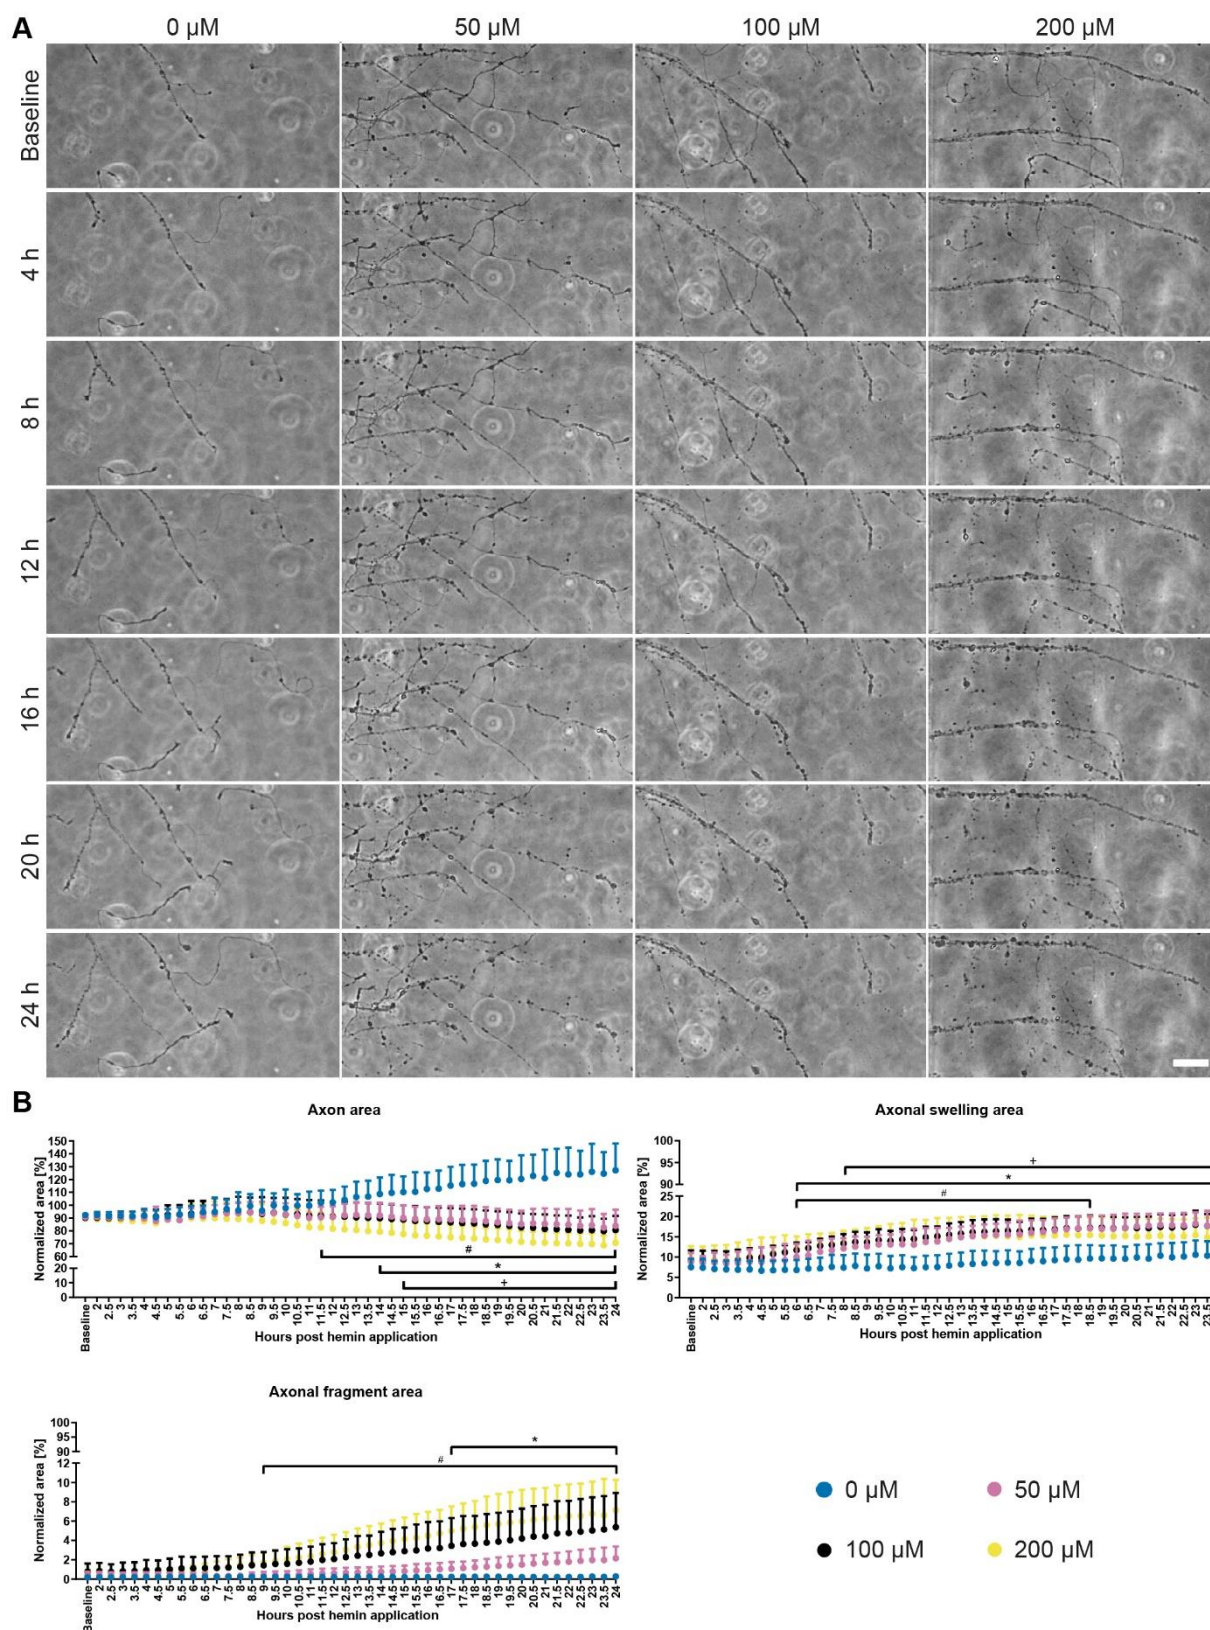

918  
 919 **Figure 4. Time- and concentration-dependent hemin-induced AxD.** (A) Primary cortical axons treated with hemin  
 920 (50, 100, 200  $\mu\text{M}$ ) degenerated compared to vehicle-treated axons (0  $\mu\text{M}$ ) that continued to grow. Scale bar: 50  $\mu\text{m}$ .  
 921 For complete time-lapse videos including segmentation, refer to **Video S1-4.** (B) Quantification of AxD over 24 hours



922 in phase-contrast images. To determine the time course, the sum of pixels in each class and hemin concentration over  
923 time was normalized to the baseline of that class and condition. The quantification of the phase-contrast images over  
924 24 hours revealed significantly smaller axon areas starting at 11.5 hours after 200  $\mu\text{M}$  ( $P = 0.020$ ), at 14 hours after  
925 100  $\mu\text{M}$  ( $P = 0.040$ ), and at 15 hours after 50  $\mu\text{M}$  ( $P = 0.018$ ) hemin treatment compared to control (0  $\mu\text{M}$ ). The axonal  
926 fragment area significantly increased from 9.5 hours onwards in 200  $\mu\text{M}$  hemin ( $P = 0.037$ ) and from 17.5 hours in  
927 100  $\mu\text{M}$  hemin ( $P = 0.044$ ), while the axonal swelling area increased from 6 hours onwards in 100  $\mu\text{M}$  hemin  
928 ( $P = 0.019$ ) and 200  $\mu\text{M}$  hemin ( $P = 0.010$ ) and from 8 hours in 50  $\mu\text{M}$  hemin ( $P = 0.030$ ).  $N = 6$  independent cultures  
929 of primary cortical neurons. Means + 95 % CI are given. One-way ANOVA with Greenhouse-Geisser correction. +,  
930 \*, #  $P < 0.05$ ; + = 50  $\mu\text{M}$  vs. 0  $\mu\text{M}$ , \* = 100  $\mu\text{M}$  vs. 0  $\mu\text{M}$ , # = 200  $\mu\text{M}$  vs. 0  $\mu\text{M}$ . For detailed statistical information,  
931 refer to **Table S1**.

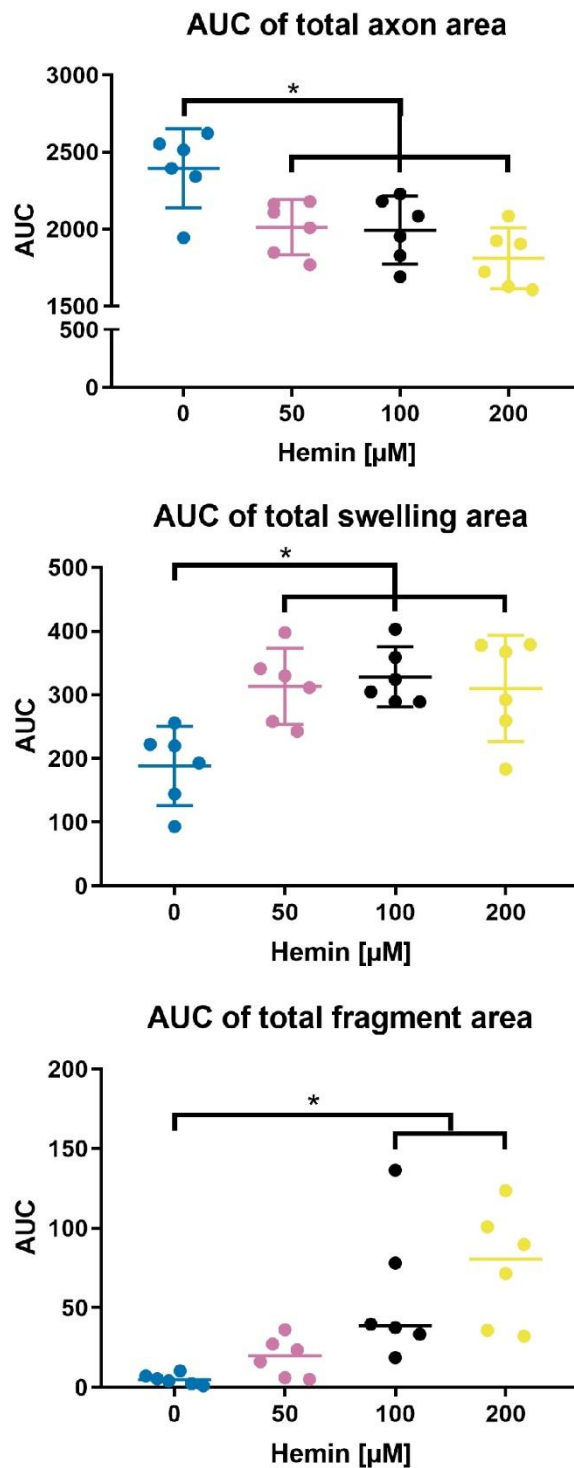

932  
933 **Figure 5. Area under the curve (AUC) analysis of hemin-induced AxD.** While axons exposed to hemin showed a  
934 decline in axon area, axonal swelling and axonal fragment area increased. N = 6 independent cultures of primary  
935 cortical neurons. Means  $\pm$  95 % CI are given for axon and axonal swelling area, medians for fragment area. \*  $P < 0.05$   
936 vs. 0  $\mu\text{M}$  for axon and swelling area, \*  $P < 0.0167$  for fragment area due to manual Bonferroni correction for  
937 nonparametric data. For exact  $p$  values, refer to **Table S2**.

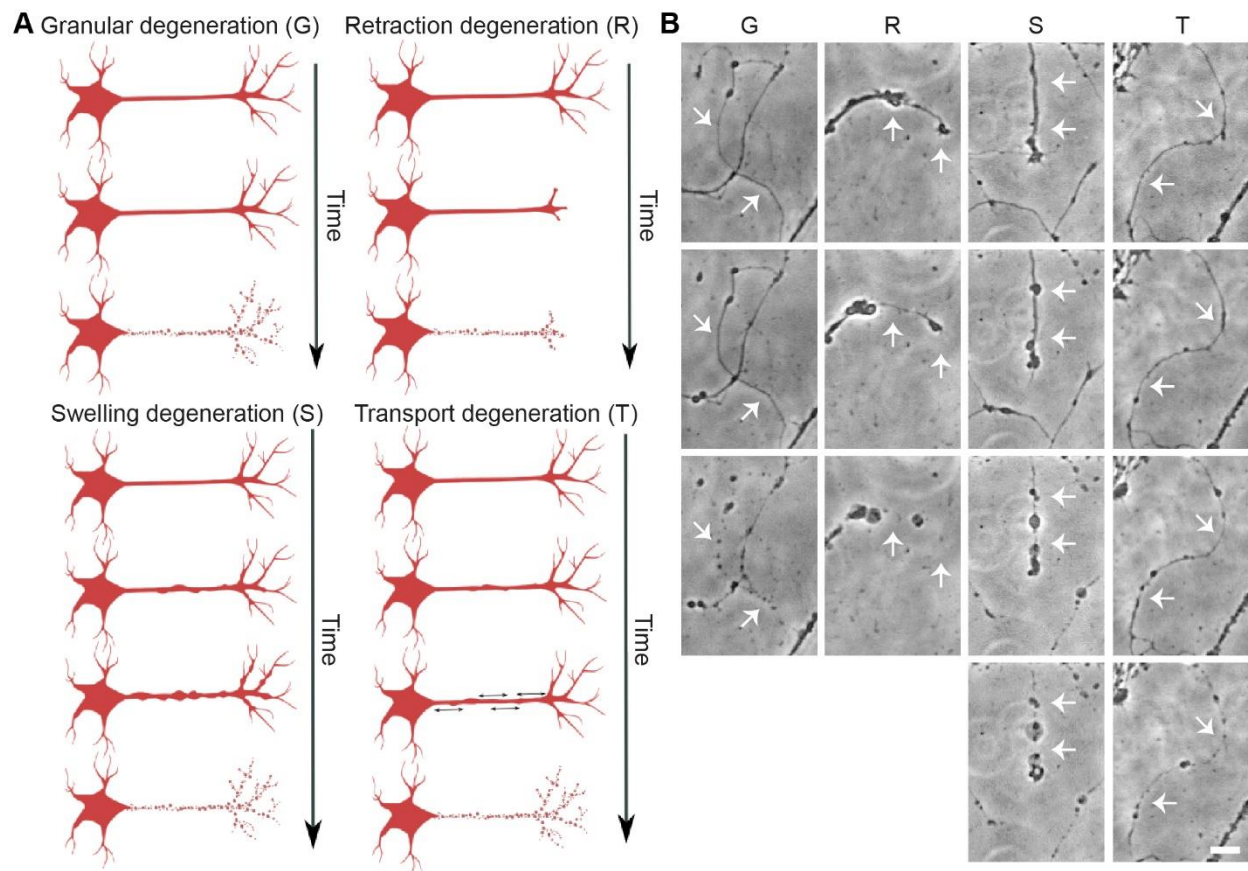

938

939 **Figure 6. Four morphological patterns of AxD.** (A) Schematic overview of the proposed AxD morphological  
940 patterns: granular degeneration, retraction degeneration, swelling degeneration, and transport degeneration. (B) Phase-  
941 contrast recordings of the four morphological patterns of AxD in primary cortical axons. Granular degeneration (G)  
942 is characterized by the fragmentation of the axon (white arrows). During retraction degeneration (R), the axonal  
943 growth cone retracts in the proximal direction and the part of the axon in proximity of the growth cone disintegrates  
944 accompanied by axonal swellings (white arrows). During swelling degeneration (S), many axonal swellings enlarge  
945 resulting in axonal fragments (white arrows). During transport degeneration (T), axonal swellings are transported  
946 along the axon prior to the degeneration of the axon (white arrows). Scale bar: 20  $\mu\text{m}$ . For complete time-lapse videos  
947 including segmentation, refer to **Videos S5-8**.



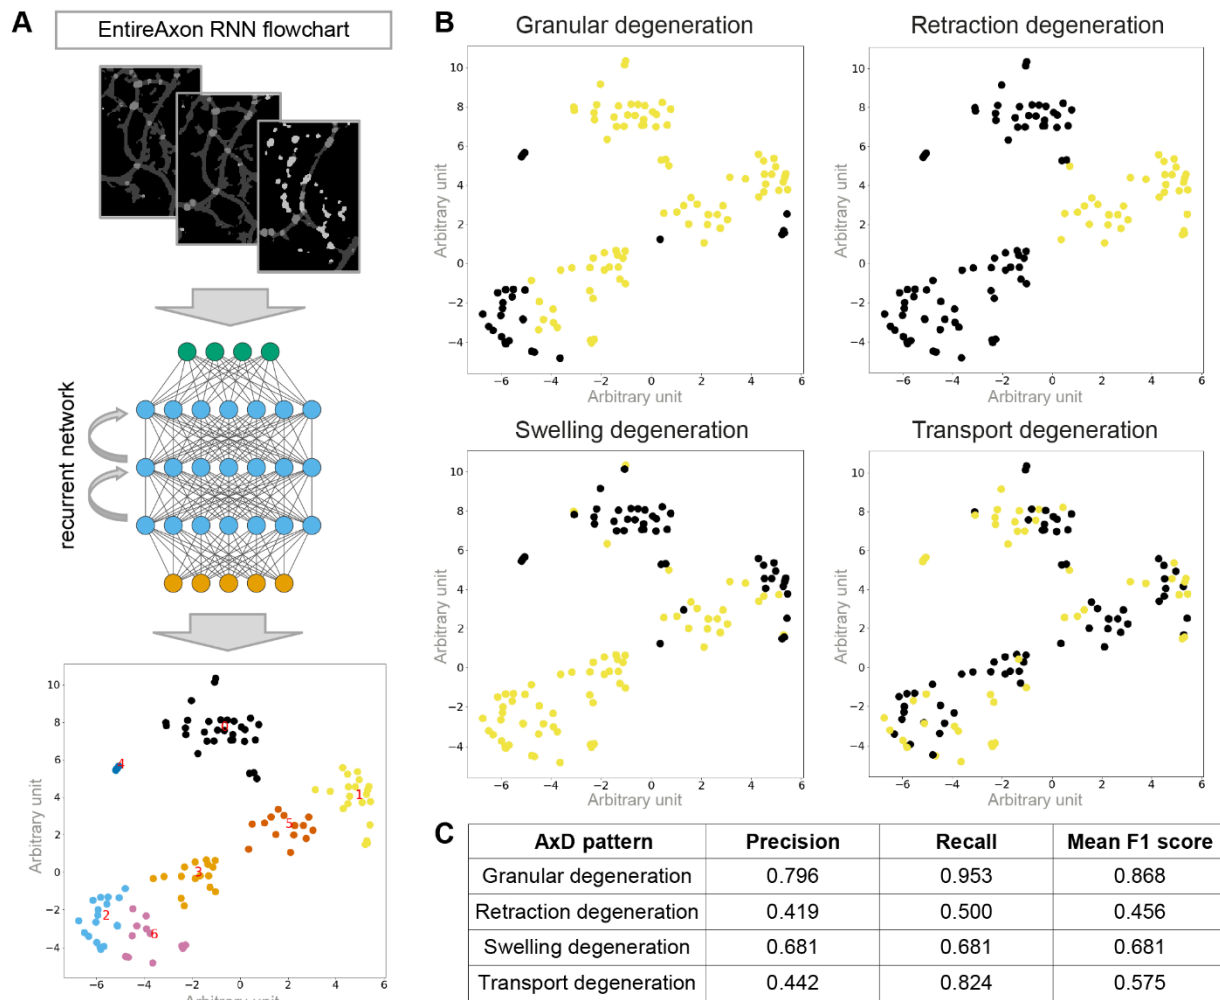

948  
 949 **Figure 7. Recognition of four morphological patterns of AxD by the EntireAxon RNN.** (A) Schematic workflow  
 950 of the RNN to recognize and quantify morphological patterns of AxD based on the identification of seven clusters.  
 951 The EntireAxon CNN segmentation masks were used for the RNN training, which determined the change in class  
 952 over time. Based on the 16 different possible class pairs, the RNN determined seven clusters (cluster 0-6). To visualize  
 953 the relationships of the specific samples, we employed t-distributed stochastic neighborhood embedding (T-SNE) to  
 954 compute a 2-dimensional representation of the high-dimensional data. (B) The clusters classify the four morphological  
 955 patterns of AxD with yellow indicating included and purple indicating excluded clusters: granular (G), retraction (R),  
 956 swelling (S), and transport degeneration (T). Clusters of granular degeneration overlap with recognized clusters of  
 957 other morphological patterns (retraction, swelling, and transport degeneration). For more details on the morphological  
 958 changes underlying the cluster analysis, refer to **Supplementary Fig. S3**. (C) 10-fold cross-validation of the four  
 959 morphological patterns of AxD.

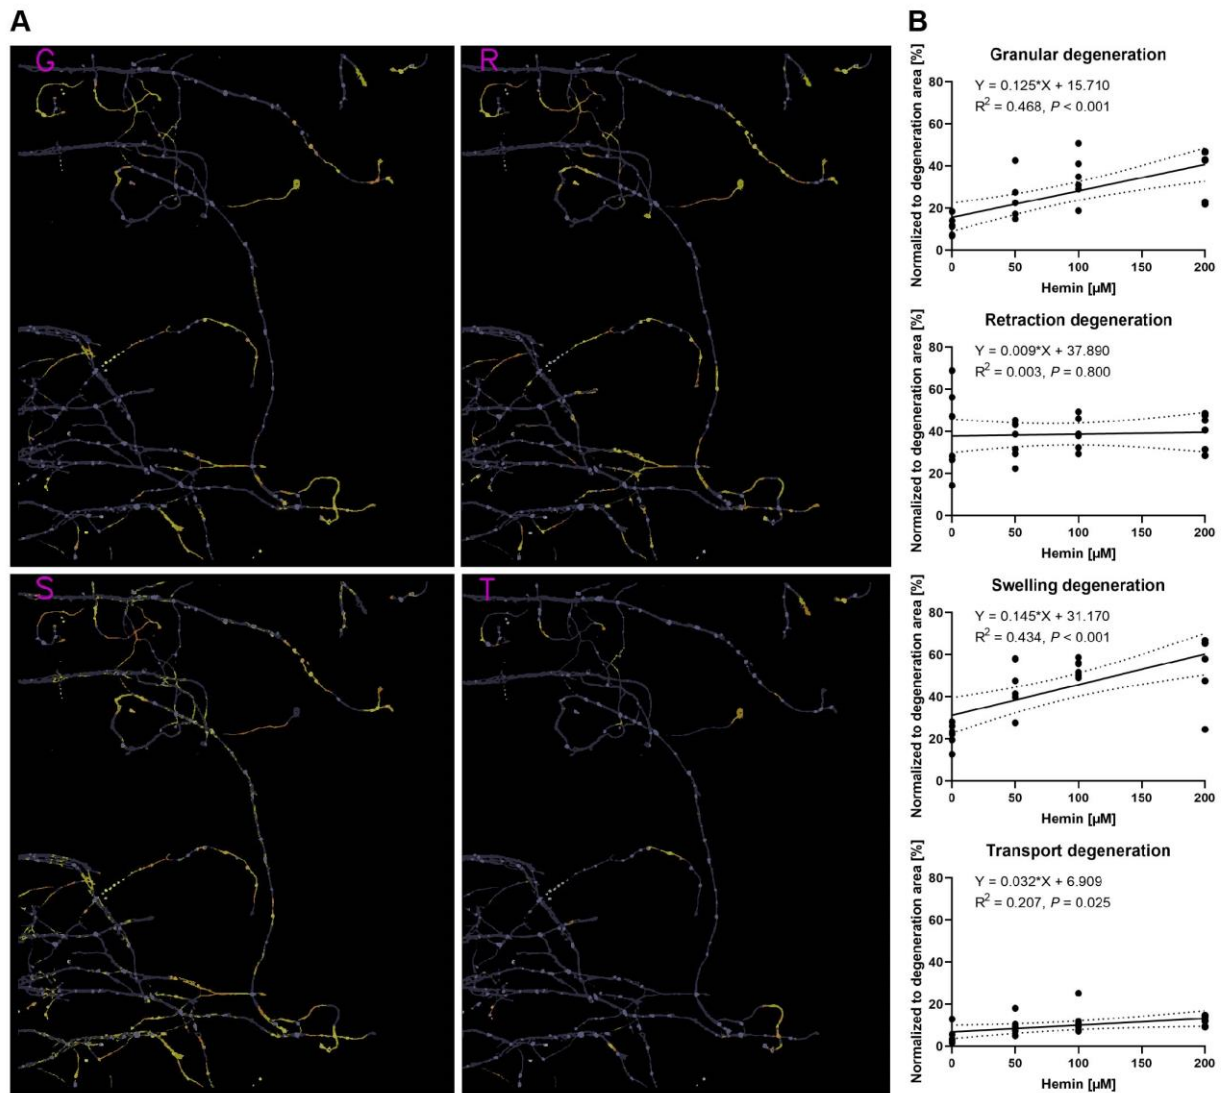

960  
961 **Figure 8. Concentration-dependent differences in the morphological patterns of hemin-induced AxD.** (A) The  
962 classification of granular (G), retraction (R), swelling (S), and transport degeneration (T) in primary cortical axons  
963 treated with 200  $\mu\text{M}$  hemin. For the complete time-lapse video including segmentation, refer to **Video S9**. (B) Linear  
964 regressions of the four morphological patterns of AxD in hemin-induced AxD. The area classified for each AxD  
965 pattern was normalized to the total degeneration area. Dotted lines show 95 % confidence bands. N = 6 independent  
966 cultures of primary cortical neurons. Granular degeneration:  $F(1,22) = 19.330, P < 0.001$ . Retraction degeneration:  
967  $F(1,22) = 0.066, P = 0.800$ . Swelling degeneration:  $F(1,22) = 16.900, P < 0.001$ . Transport degeneration:  
968  $F(1,22) = 5.757, P = 0.025$ . For the comparison of the slopes between the different AxD patterns, refer to **Table S3**.
